# Supplementary material for: Cylindrospermopsin- and Deoxycylindrospermopsin-Producing Raphidiopsis raciborskii and Microcystin-Producing Microcystis spp. in Meiktila Lake, Myanmar
Source: MDPI journal article supplement (doi:10.3390/toxins12040232), 2020-04-07
Supplement: s1 [file s1]

# Supplementary Materials: Cyindrospermopsin- and Deoxycyindrospermopsin-Producing *Raphidiopsis raciborskii* and Microcystin-Producing *Microcystis* spp. in Meiktila Lake, Myanmar

Andreas Ballot, Thida Swe, Marit Mjelde, Leonardo Cerasino, Vladyslava Hostyeva and Christopher O. Miles

| Table of Contents |                                                                                                                             | Page   |
|-------------------|-----------------------------------------------------------------------------------------------------------------------------|--------|
| Figure S1         | LC-HRMS/MS spectra of [D-Asp <sup>3</sup> ]MC-RR (1) and MC-RR (3)                                                          | S3     |
| Figure S2         | LC-HRMS/MS spectra of [D-Asp <sup>3</sup> ]MC-ER (4), MC-ER (9), [D-Asp <sup>3</sup> ]MC-RE (24), and MC-RE (27)            | S4     |
| Figure S3         | LC-HRMS/MS spectra of MC-(H2)YR (6), MC-LR (17), and MC-(H4)YR (11)                                                         | S5     |
| Figure S4         | LC-HRMS/MS spectra of MC-HilR (21), MC-LR (17), and [D-Asp <sup>3</sup> ]MC-(H2)YR (7)                                      | S6     |
| Figure S5–7       | LC-HRMS/MS spectra of MC-ER (9) and MC-LR (17)                                                                              | S7–9   |
| Figure S8         | LC-HRMS/MS spectra of [Mser <sup>7</sup> ]MC-LR (12), MC-MR (15), and MC-RM (31)                                            | S10    |
| Figure S9         | LC-HRMS/MS spectra of [D-Asp <sup>3</sup> ]MC-LR (13) and MC-LR (17)                                                        | S11    |
| Figure S10        | LC-HRMS/MS spectra of MC-LR (17) and MC-YR (14)                                                                             | S12    |
| Figure S11        | LC-HRMS/MS spectra of MC-MR (15) and MC-M(O)R                                                                               | S13    |
| Figure S12        | LC-HRMS/MS spectra of unidentified MCs 19 and 22, and MC-OiaR (23)                                                          | S14    |
| Figure S13        | LC-HRMS/MS spectra of MC-LR (17) and MC-KynR (20)                                                                           | S15    |
| Figure S14        | LC-HRMS/MS spectra of MC-FR (25), MC-M(O)R and MC-RM(O)                                                                     | S16    |
| Figure S15        | LC-HRMS/MS spectra of MC-RM (31), MC-RA (28), and MC-RE (27)                                                                | S17    |
| Figure S16        | LC-HRMS/MS spectra of MC-RA (28) and MC-RABu (29)                                                                           | S18    |
| Figure S17        | LC-HRMS/MS spectra of MC-(H2)YG (30), MC-LA (41), and MC-(H2)YG (32)                                                        | S19    |
| Figure S18        | LC-HRMS/MS spectra of MC-LA (41) and unidentified MC 33                                                                     | S20    |
| Figure S19        | LC-HRMS/MS spectra of MC-LA (41) and unidentified MCs 33 and 34                                                             | S21    |
| Figure S20        | LC-HRMS/MS spectra of MC-LA (41) and unidentified MC 35                                                                     | S22    |
| Figure S21–26     | LC-HRMS/MS spectra of [D-Asp <sup>3</sup> ]MC-LE (38), [D-Asp <sup>3</sup> ]MC-LA (39), and [D-Asp <sup>3</sup> ]MC-EE (36) | S19–28 |
| Figure S27        | LC-HRMS/MS spectra of MC-EE (37), [D-Asp <sup>3</sup> ]MC-EE (36), MC-LE (40), and [D-Asp <sup>3</sup> ]MC-LE (38)          | S29    |
| Figure S28–33     | LC-HRMS/MS spectra of MC-LE (40), MC-LA (41), and MC-EE (37)                                                                | S30–35 |
| Figure S34–36     | LC-HRMS/MS spectra of MC-HilA (42), MC-LA (41), and MC-LABu (45)                                                            | S36–38 |
| Figure S37–39     | LC-HRMS/MS spectra of MC-FA (44), MC-LA (41), and MC-WA (43)                                                                | S39–41 |
| Figure S40–42     | LC-HRMS/MS spectra of MC-HilA (42), MC-LA (41), and MC-HilABu (46)                                                          | S42–44 |
| Figure S43–45     | LC-HRMS/MS spectra of MC-FABu (48), MC-LABu (45), and MC-WABu (47)                                                          | S45–47 |
| Figure S46–48     | LC-HRMS/MS spectra of MC-LL (50), MC-LA (41), and MC-LV (49)                                                                | S48–50 |
| Figure S49–51     | LC-HRMS/MS spectra of MC-FV (51), MC-LV (49), and MC-WV (53)                                                                | S51–53 |
| Figure S52–54     | LC-HRMS/MS spectra of <i>iso</i> -MC-LL (52), MC-LL (50), and MC-WL (54)                                                    | S54–56 |
| Figure S55        | LC-HRMS/MS spectra of MC-FV (51), and <i>iso</i> -MC-FV (55)                                                                | S57    |
| Figure S56        | LC-HRMS/MS spectra of MC-WL (54), and <i>iso</i> -MC-WL (56)                                                                | S58    |
| Figure S57–59     | LC-HRMS/MS spectra of MC-WL (54), and standard of MC-LW                                                                     | S59–61 |
| Figure S60        | LC-HRMS spectra of unidentified MCs 33–35                                                                                   | S62    |
| Table S1          |                                                                                                                             | S63    |

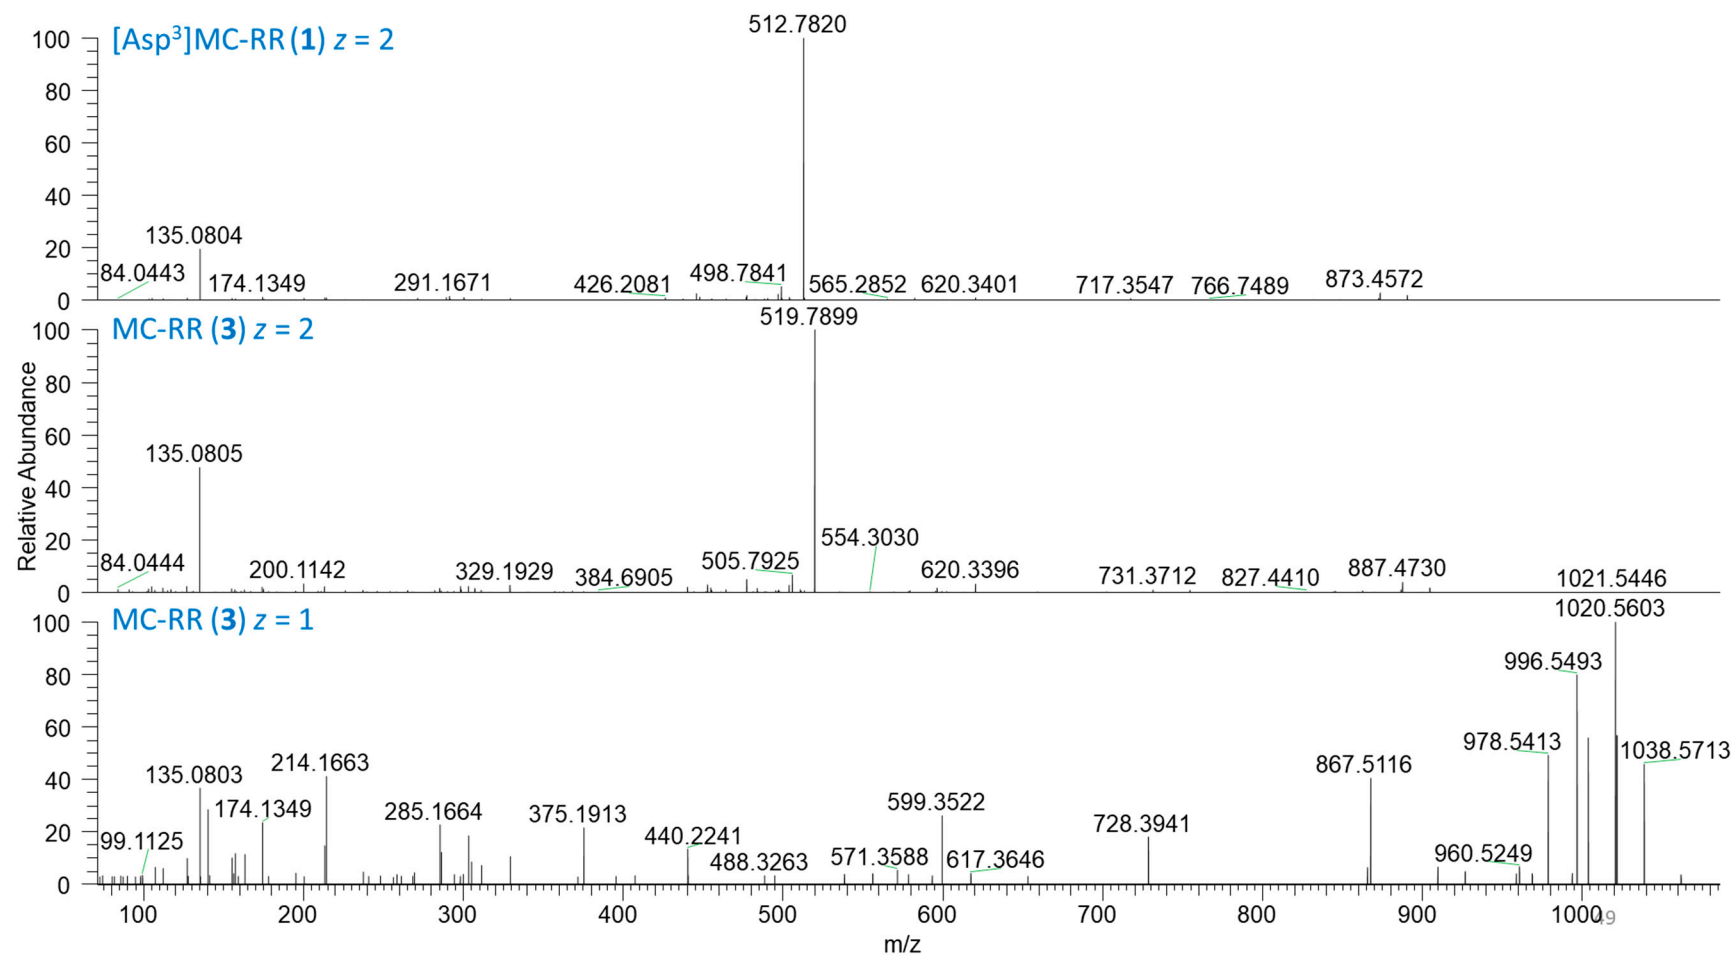

**Figure S1.** LC-HRMS/MS spectra of  $[M+2H]^{2+}$  of [D-Asp<sup>3</sup>]MC-RR (1) and MC-RR (3), and of  $[M+H]^+$  of 3.

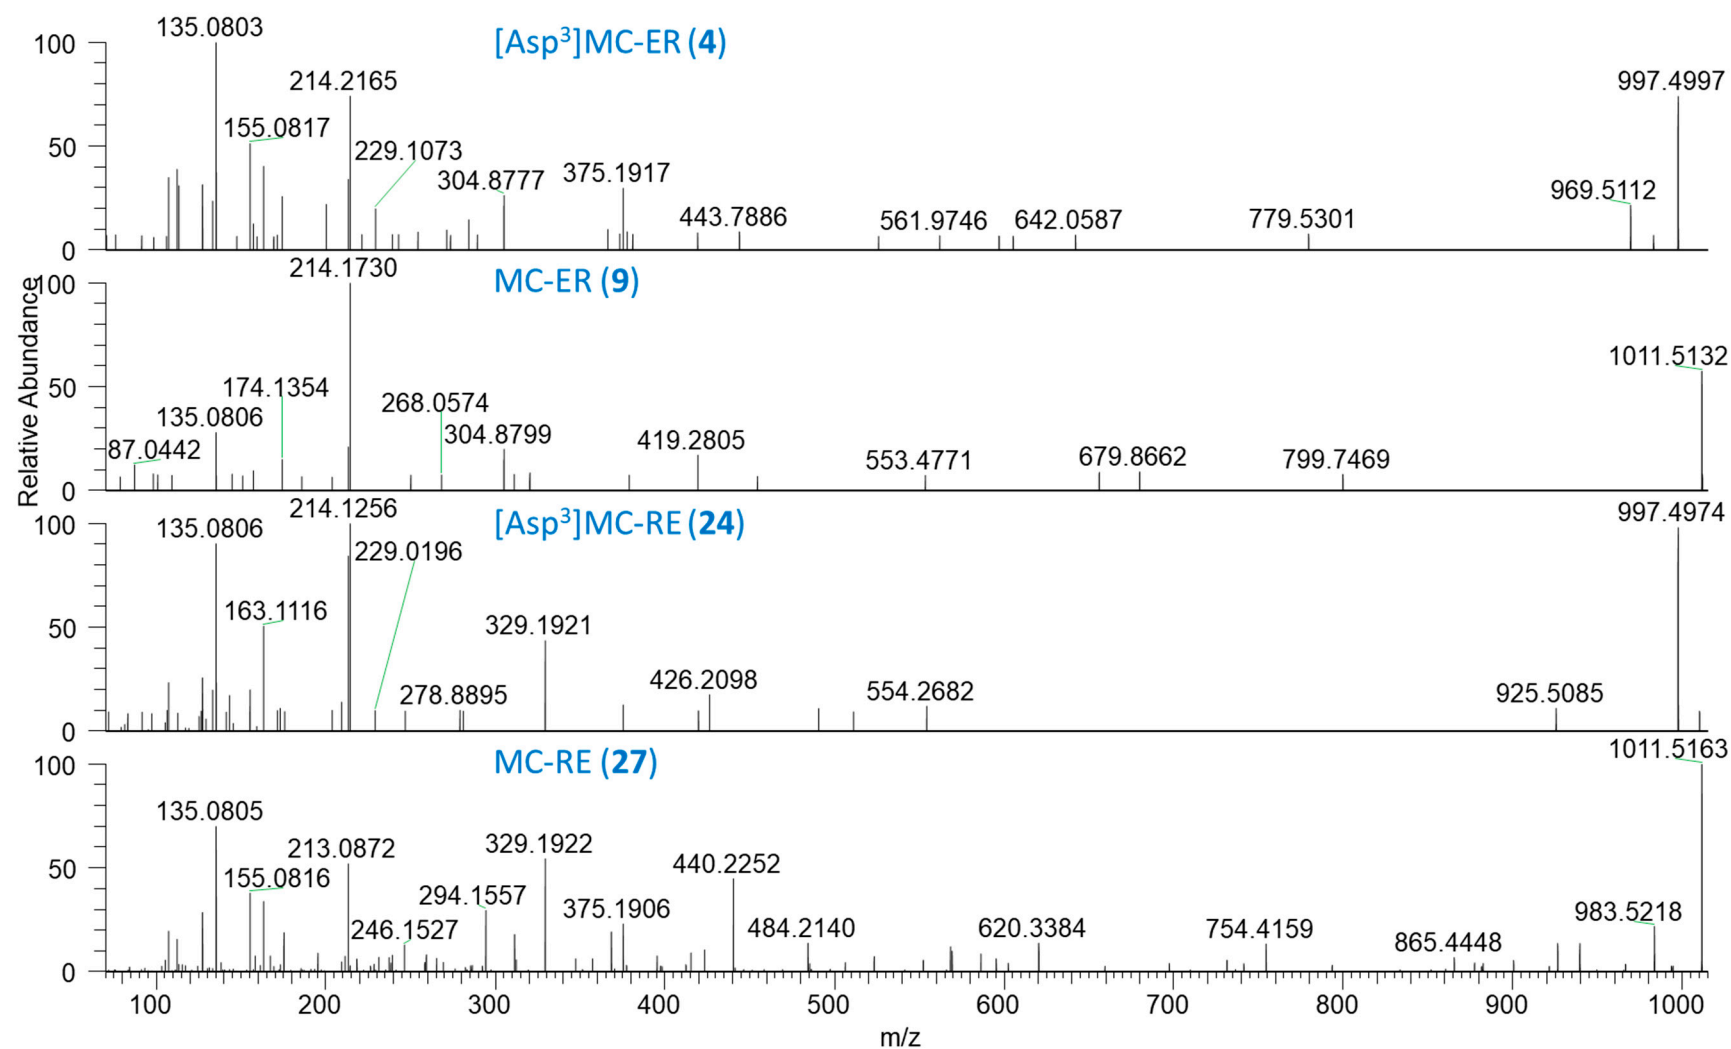

**Figure S2.** LC-HRMS/MS spectra of  $[M+H]^+$  of [D-Asp<sup>3</sup>]MC-ER (4), MC-ER (9), [D-Asp<sup>3</sup>]MC-RE (24) and MC-RE (27).

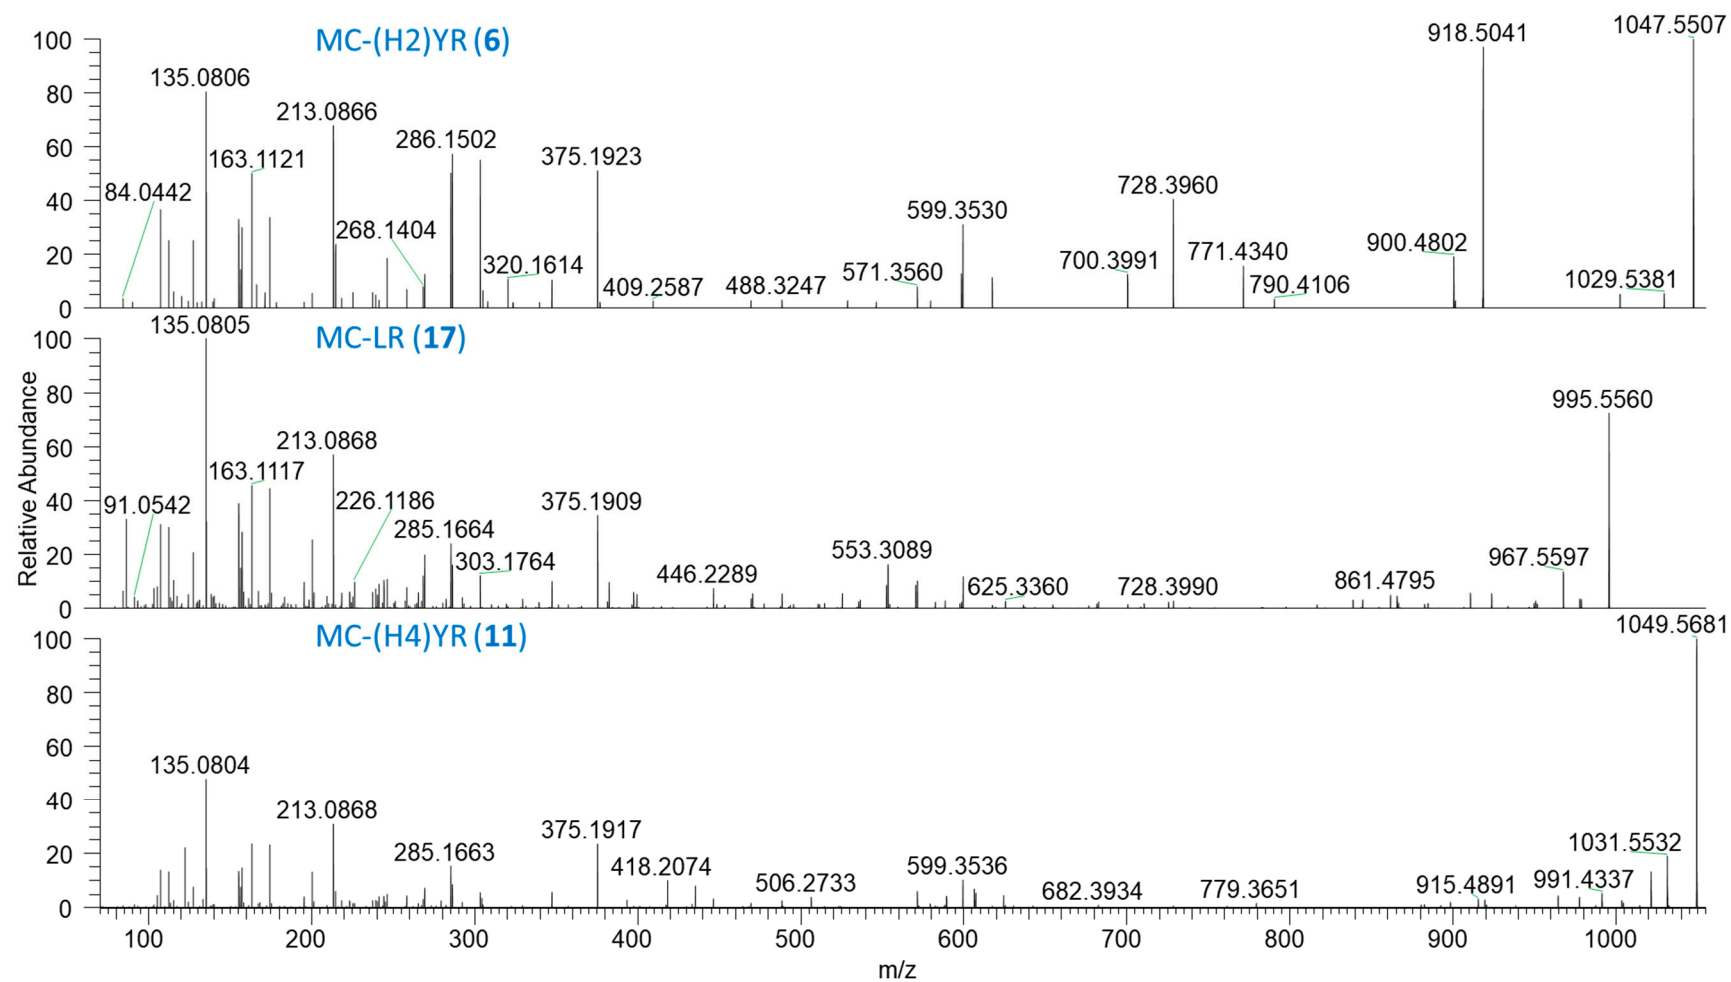

**Figure S3.** LC-HRMS/MS spectra of  $[M+H]^+$  of MC-(H2)YR (6), MC-LR (17), and MC-(H4)YR (11).



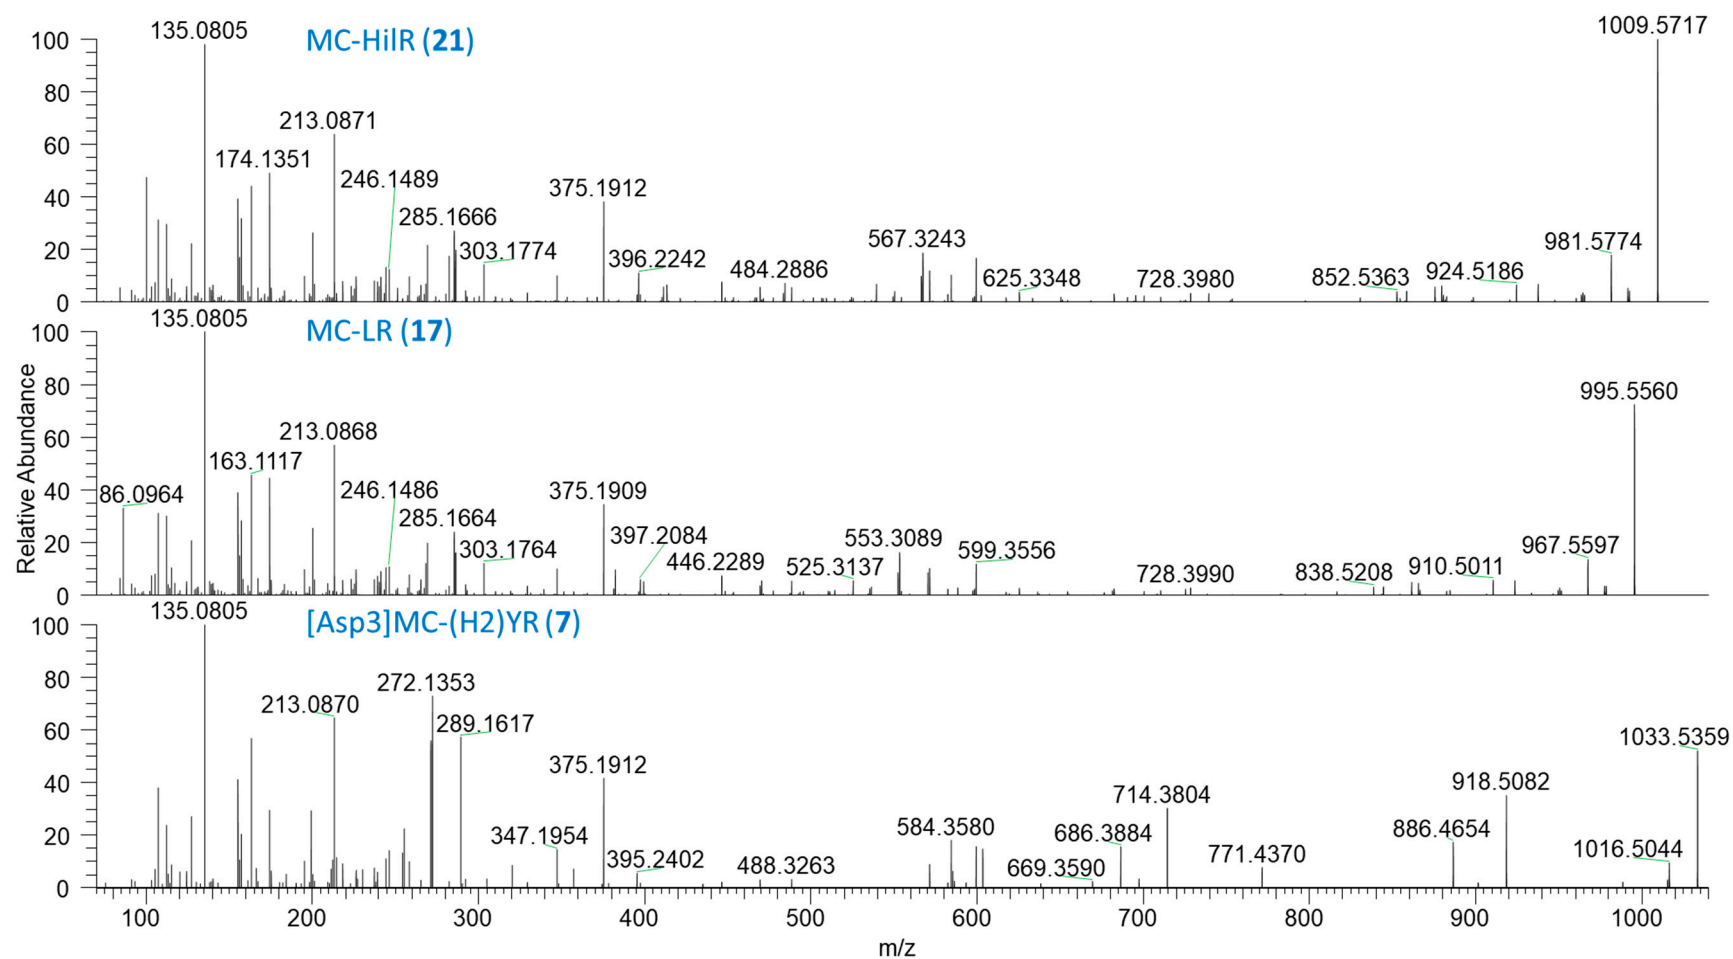

**Figure S4.** LC-HRMS/MS spectra of  $[M+H]^+$  of MC-HiLR (21), MC-LR (17), and  $[D\text{-Asp}^3]\text{MC}-(H_2)YR$  (7).

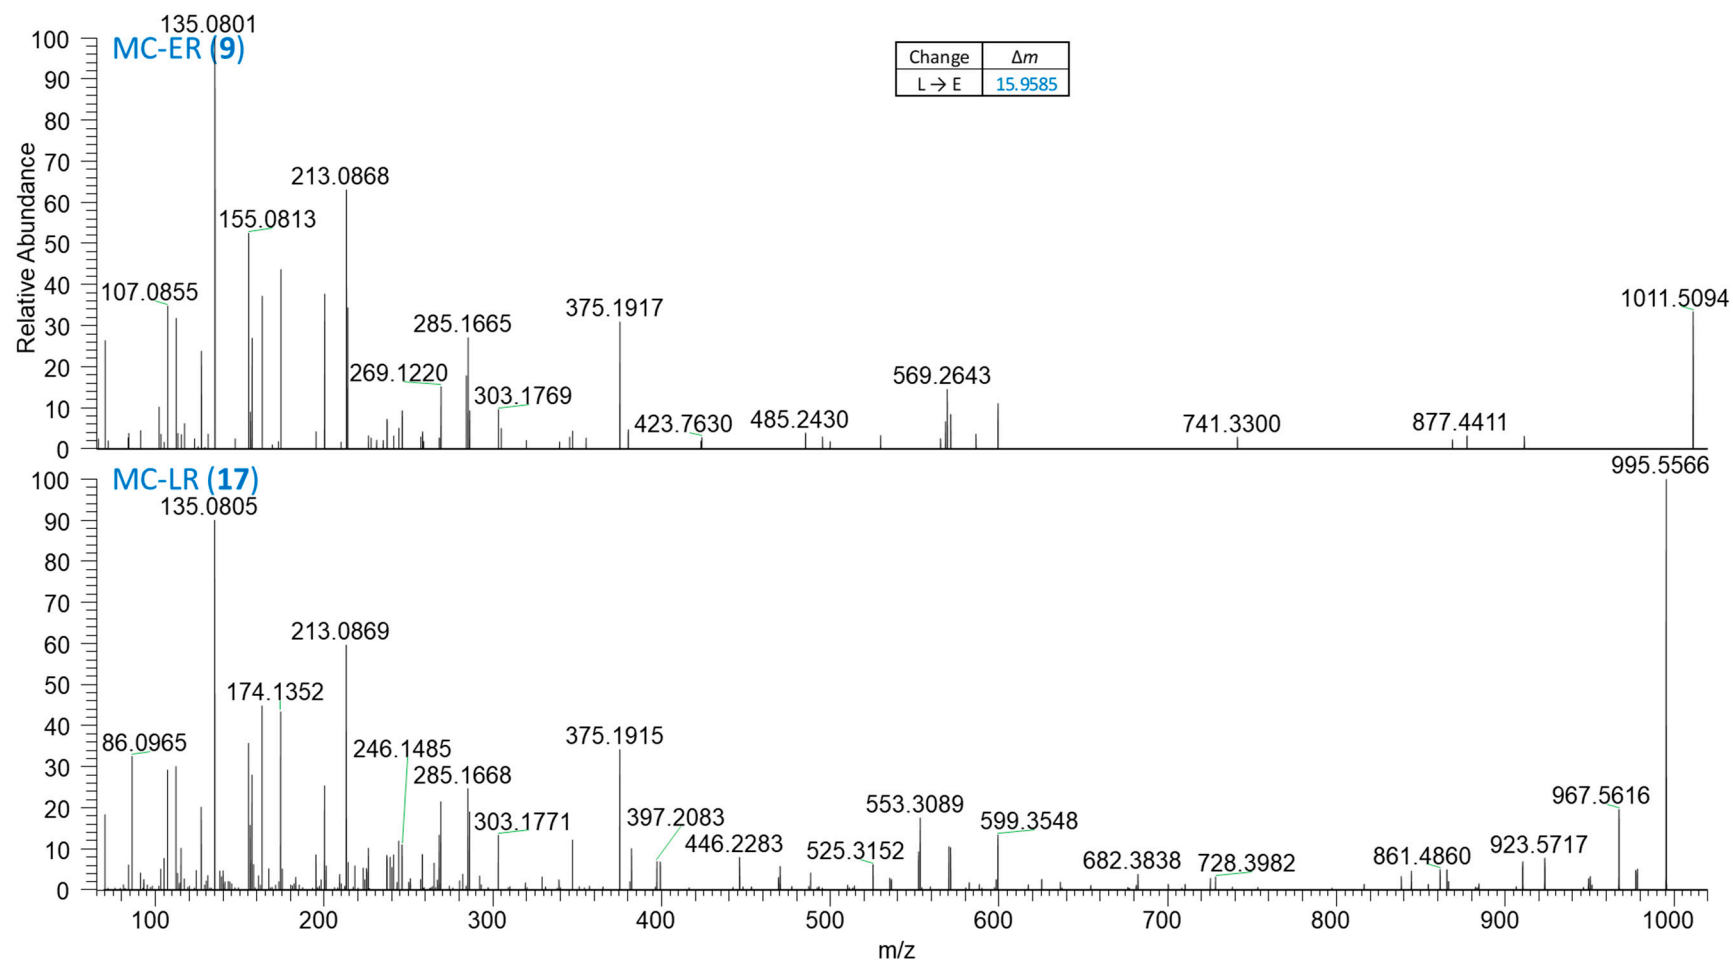

Figure S5. LC-HRMS/MS spectra of  $[M+H]^+$  of MC-ER (9) and MC-LR (17).

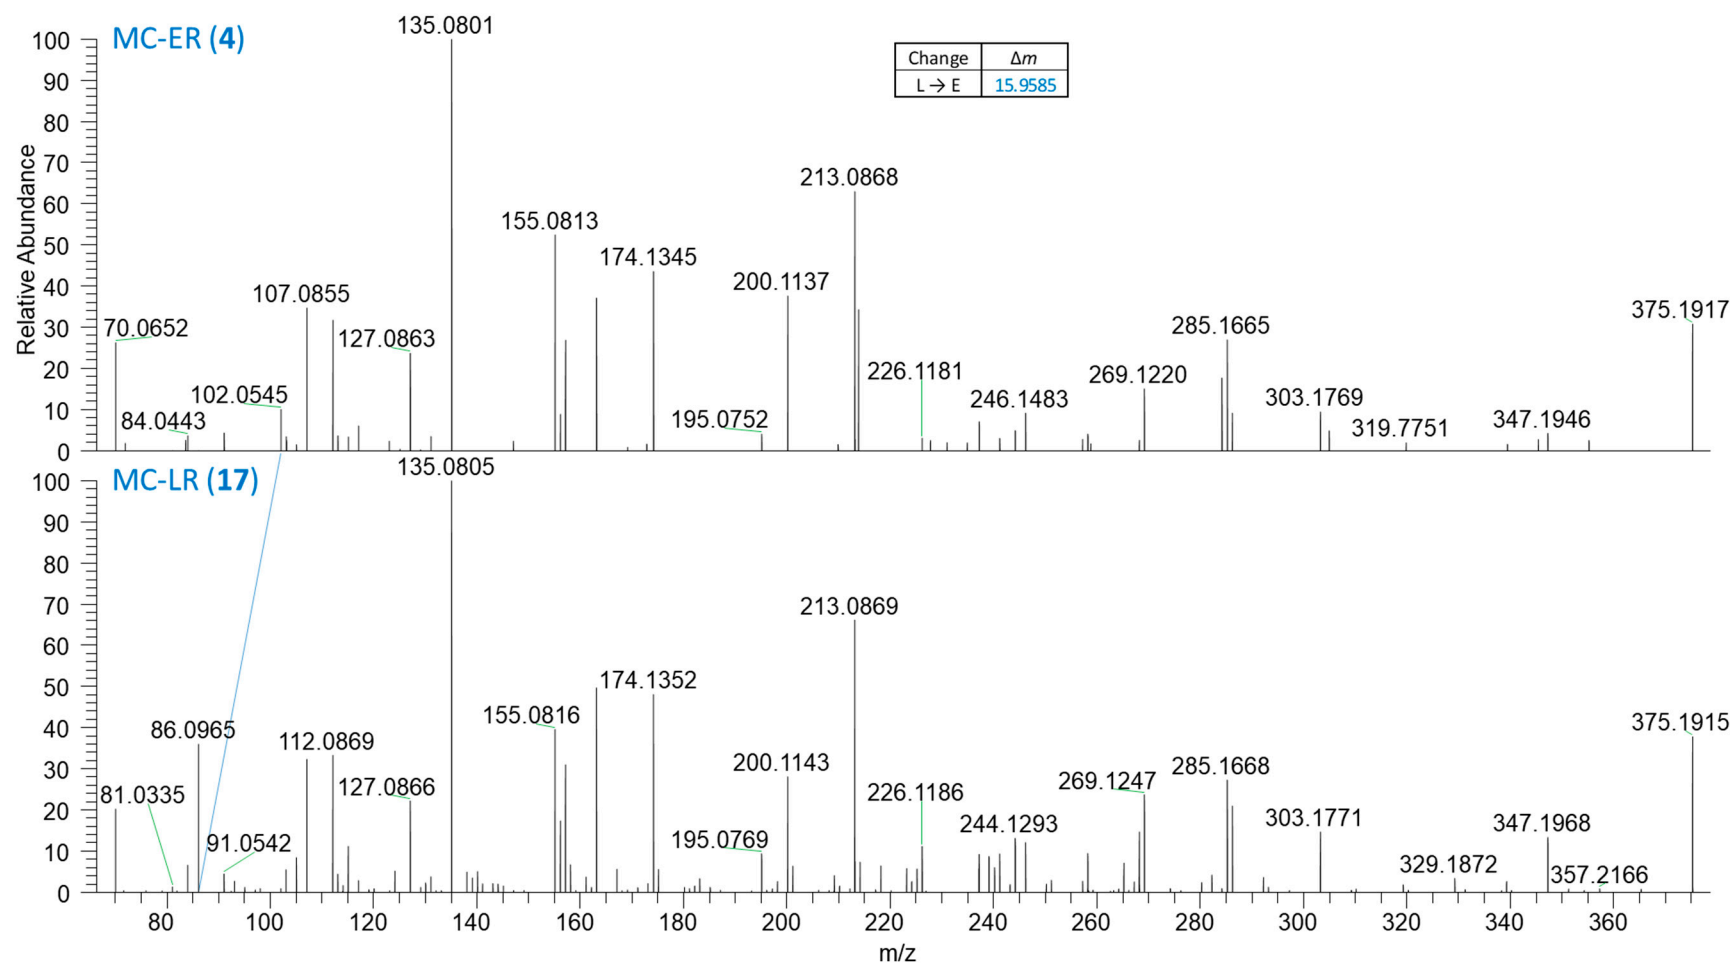

**Figure S6.** Expansion of LC-HRMS/MS spectra of  $[M+H]^+$  of MC-ER (9) and MC-LR (17).

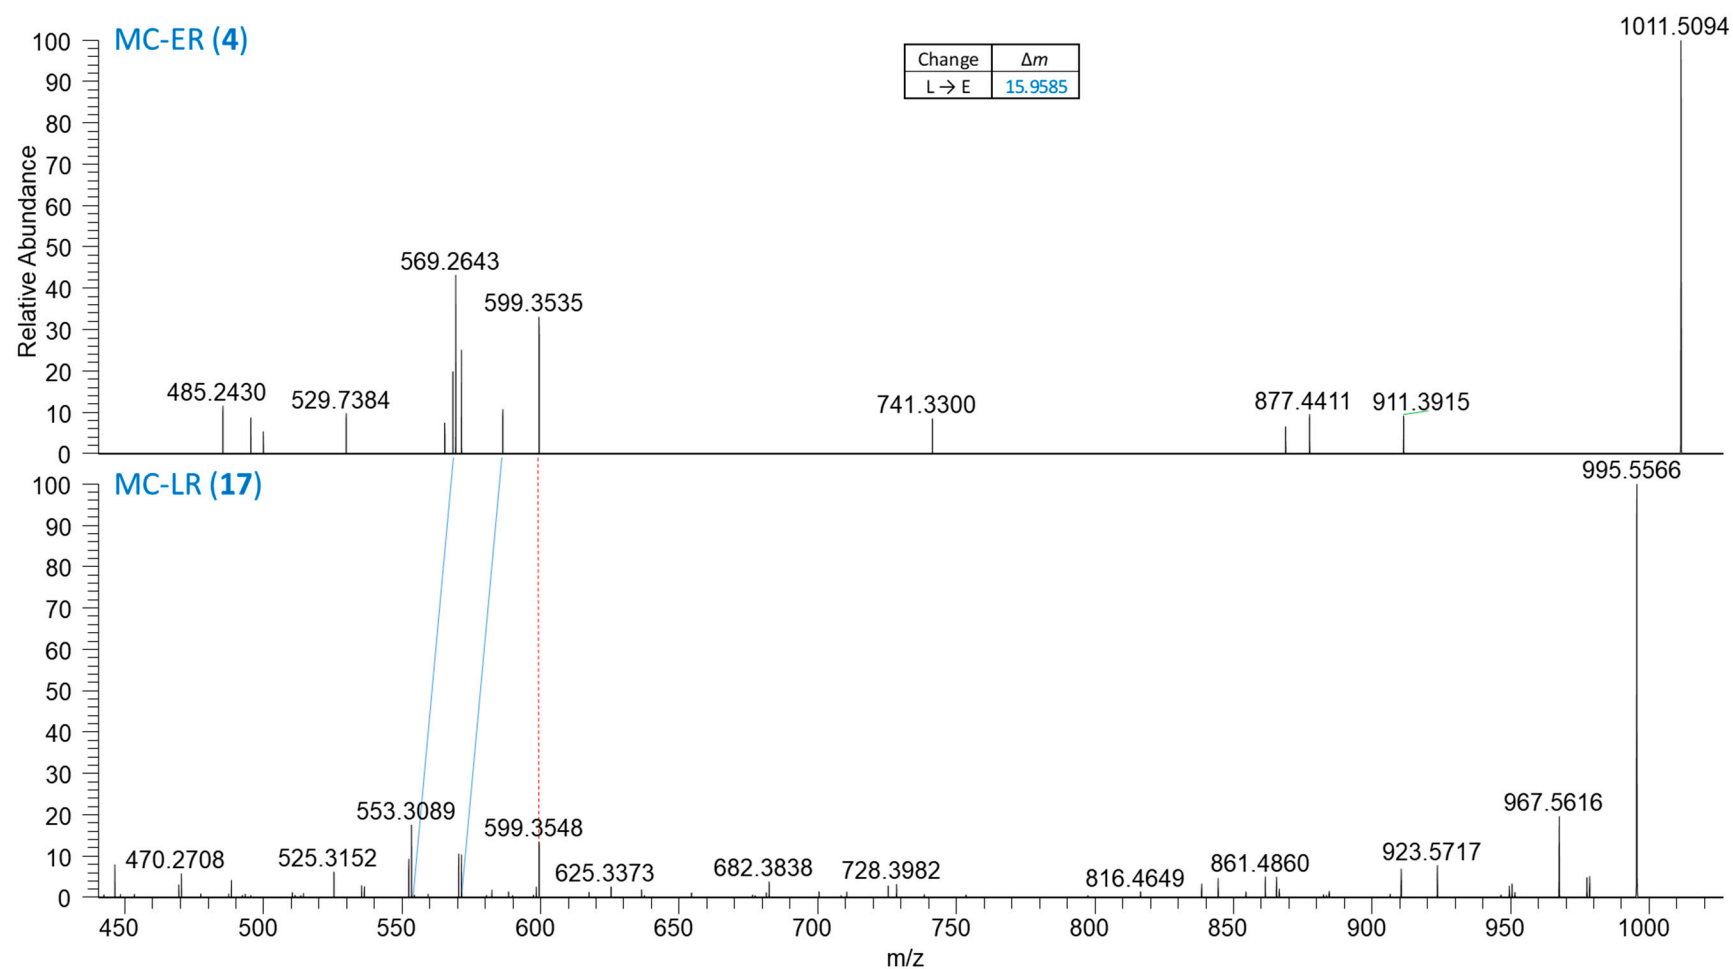

**Figure S7.** Expansion of LC-HRMS/MS spectra of  $[M+H]^+$  of MC-ER (9) and MC-LR (17).

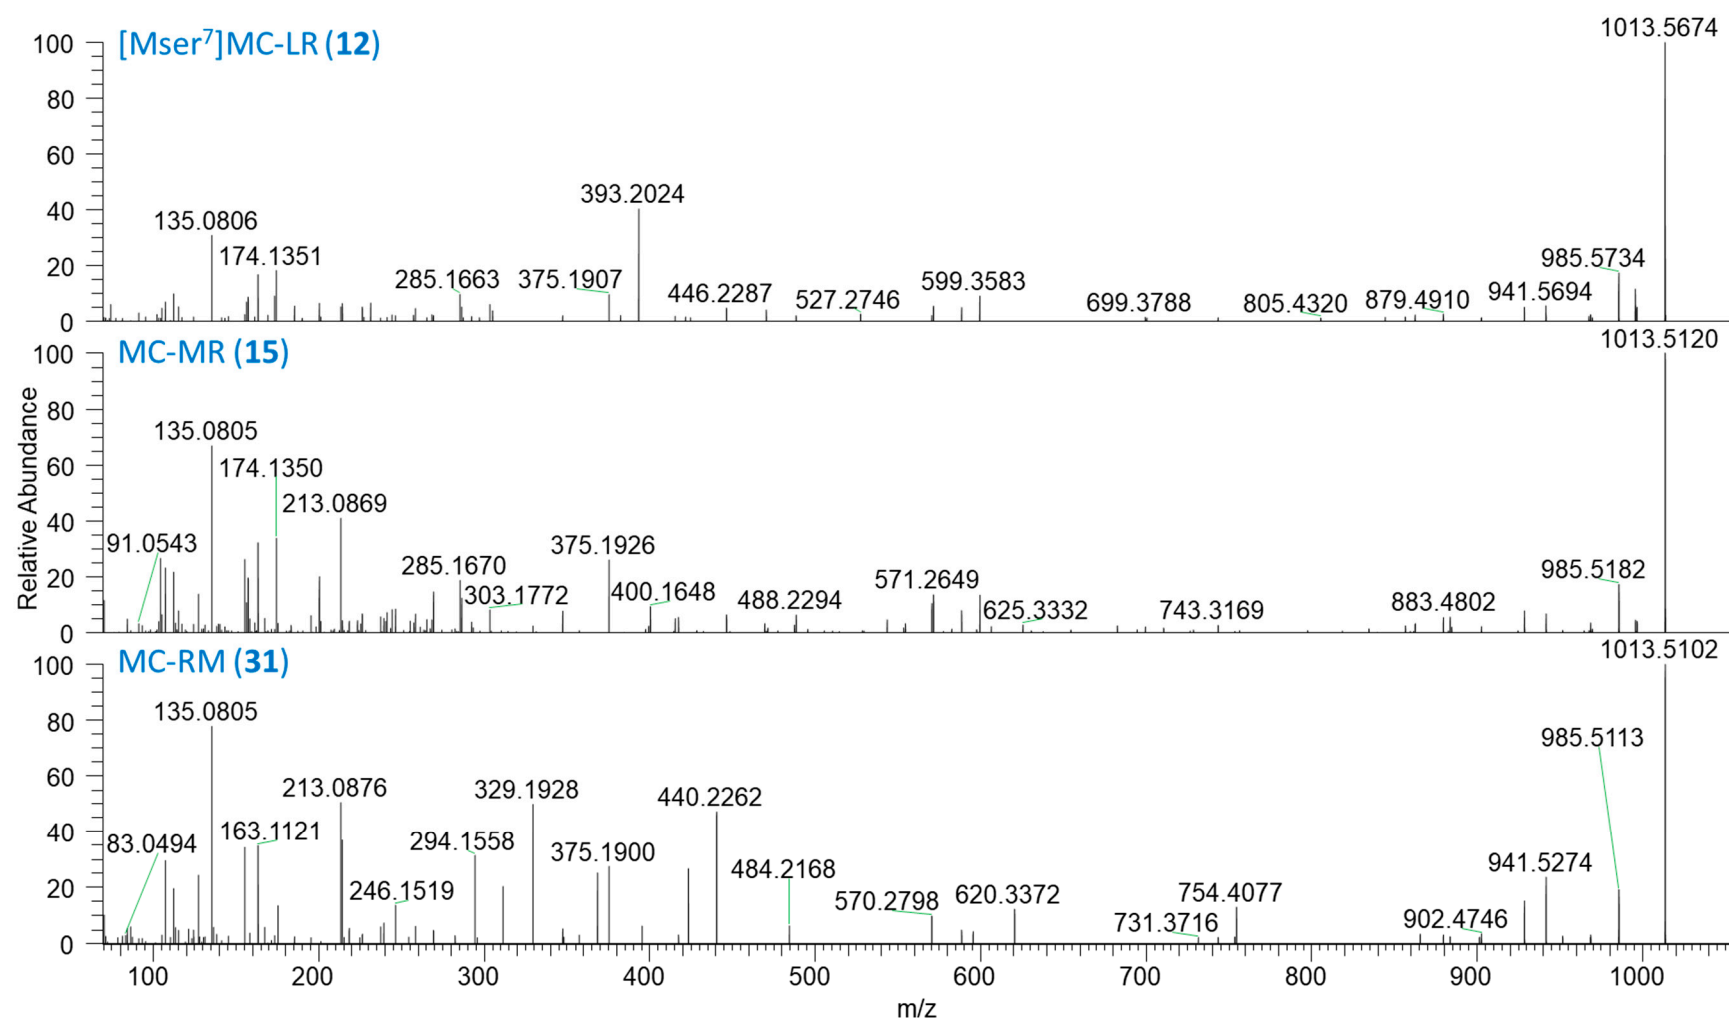

**Figure S8.** LC-HRMS/MS spectra of  $[M+H]^+$  of [Mser<sup>7</sup>]MC-LR (12), MC-MR (15), and MC-RM (31).

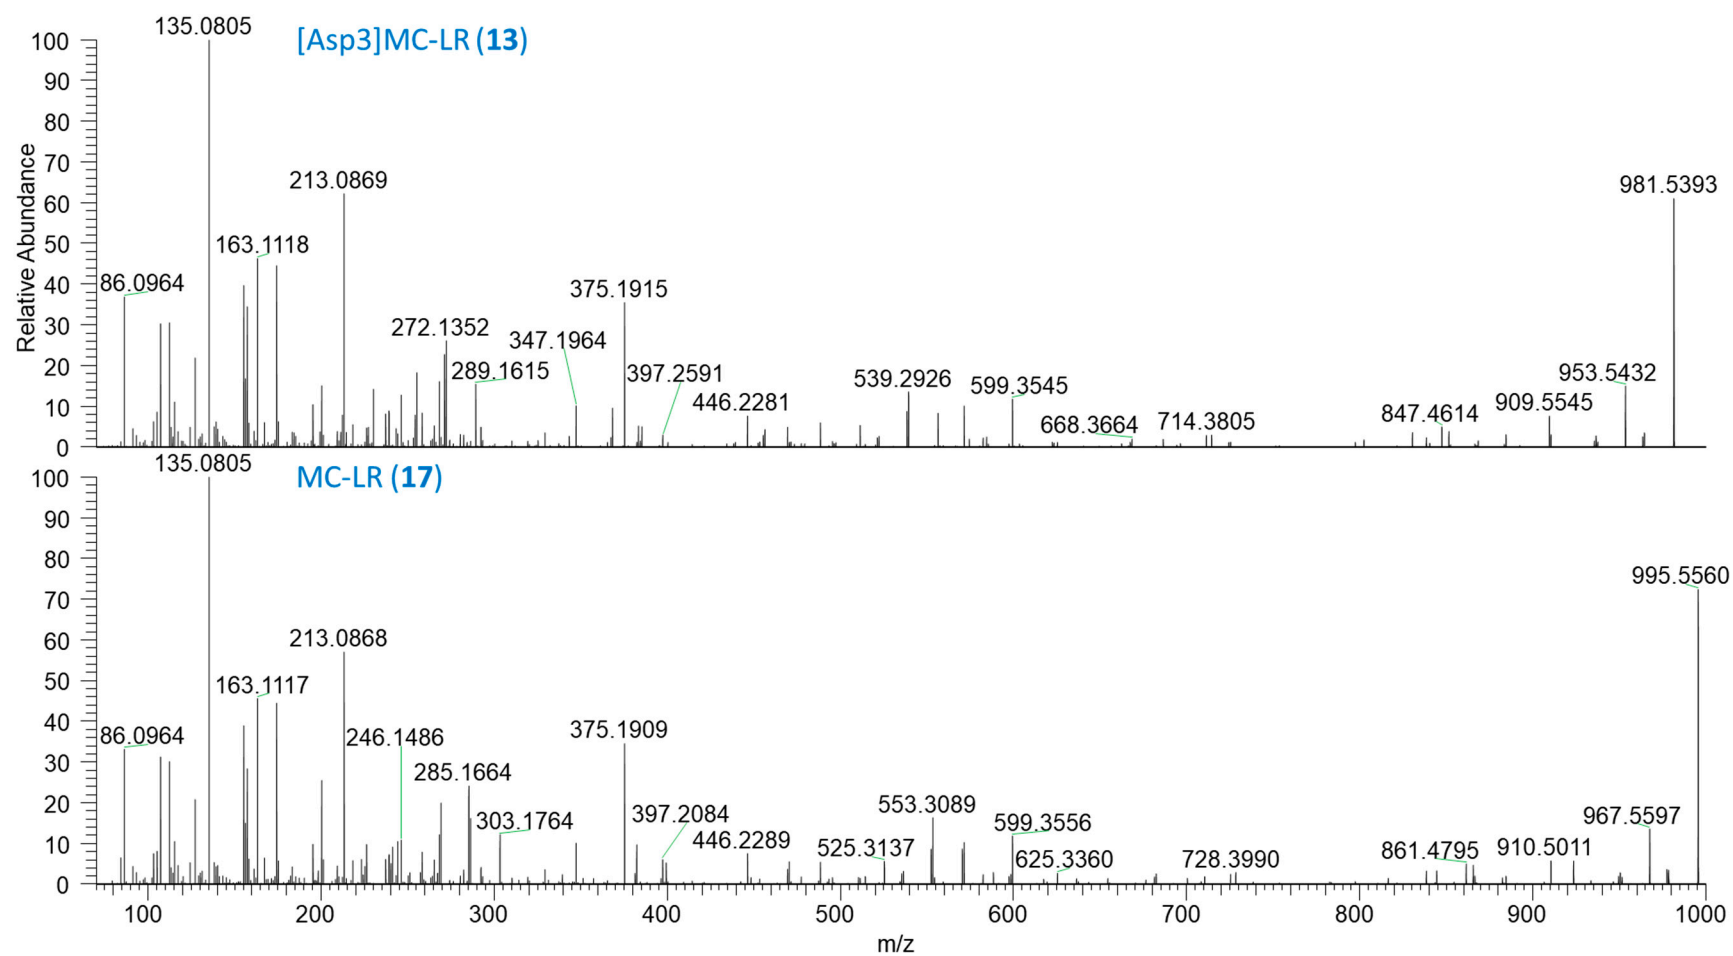

Figure S9. LC-HRMS/MS spectra of  $[M+H]^+$  of  $[D\text{-Asp}^3]\text{MC-LR}$  (13), and MC-LR (17).

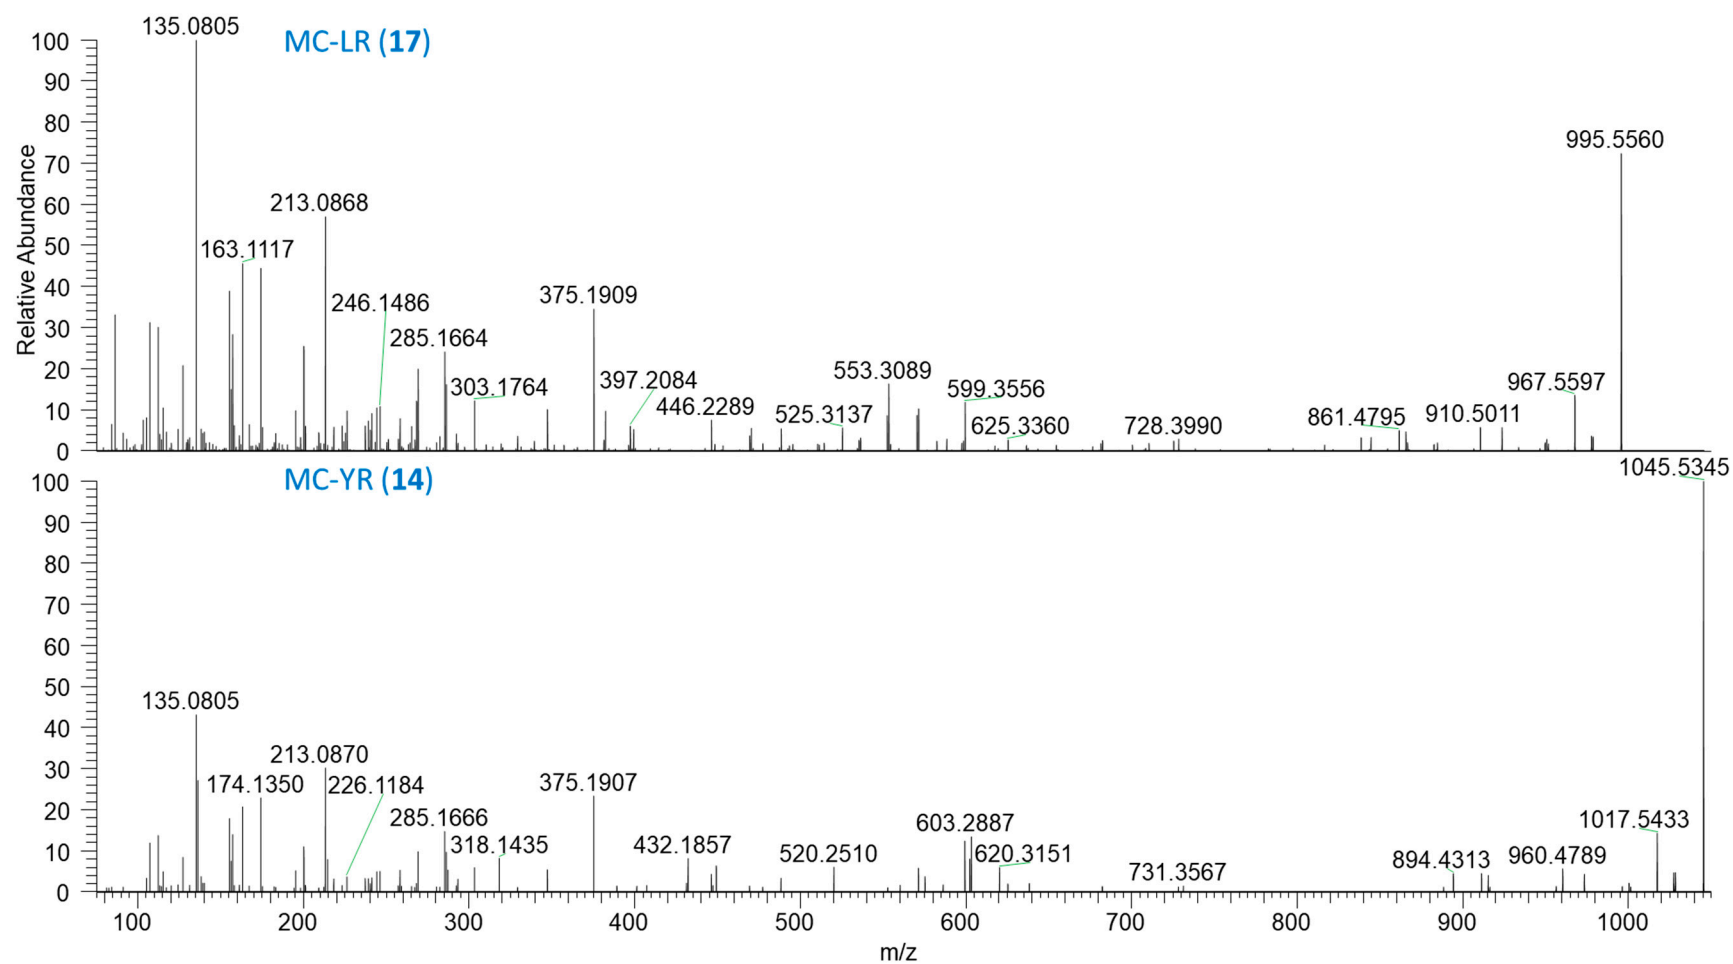

Figure S10. LC-HRMS/MS spectra of  $[M+H]^+$  of MC-LR (17), and MC-YR (14).

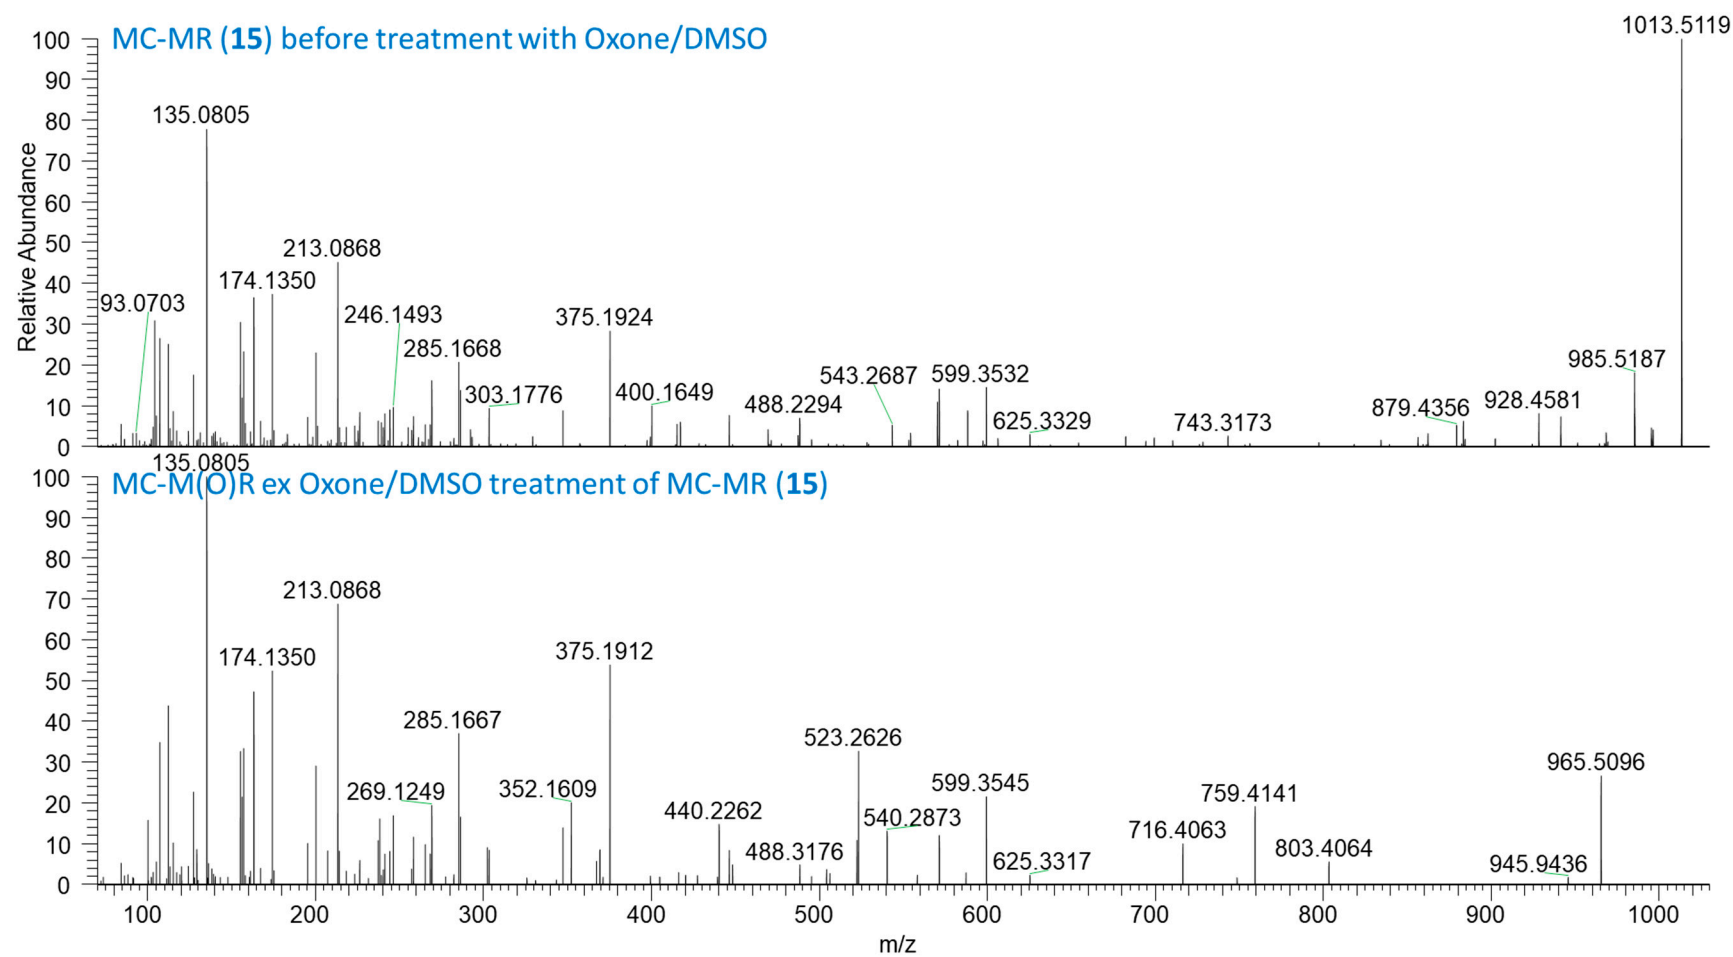

**Figure S11.** LC-HRMS/MS spectra of  $[M+H]^+$  of MC-MR (15), and MC-M(O)R produced by oxidation of 15 in the sample with Oxone and DMSO.



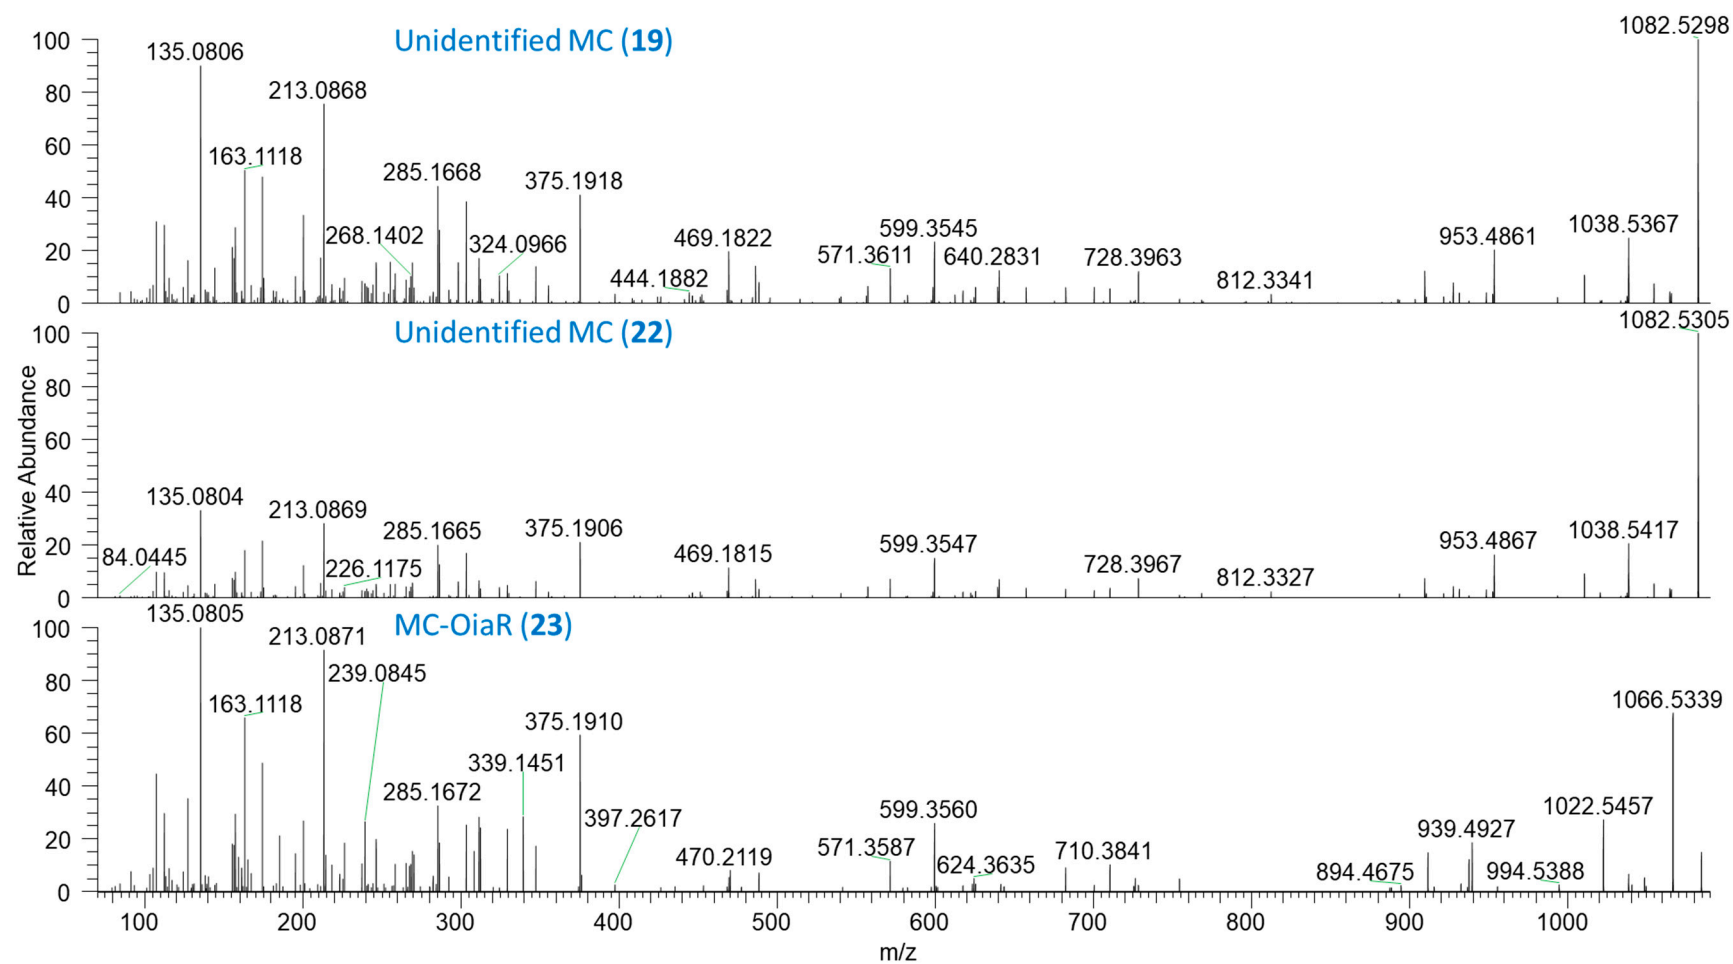

**Figure S12.** LC-HRMS/MS spectra of  $[M+H]^+$  of unidentified microcystin-19, unidentified microcystin-22, and MC-OiaR (23).

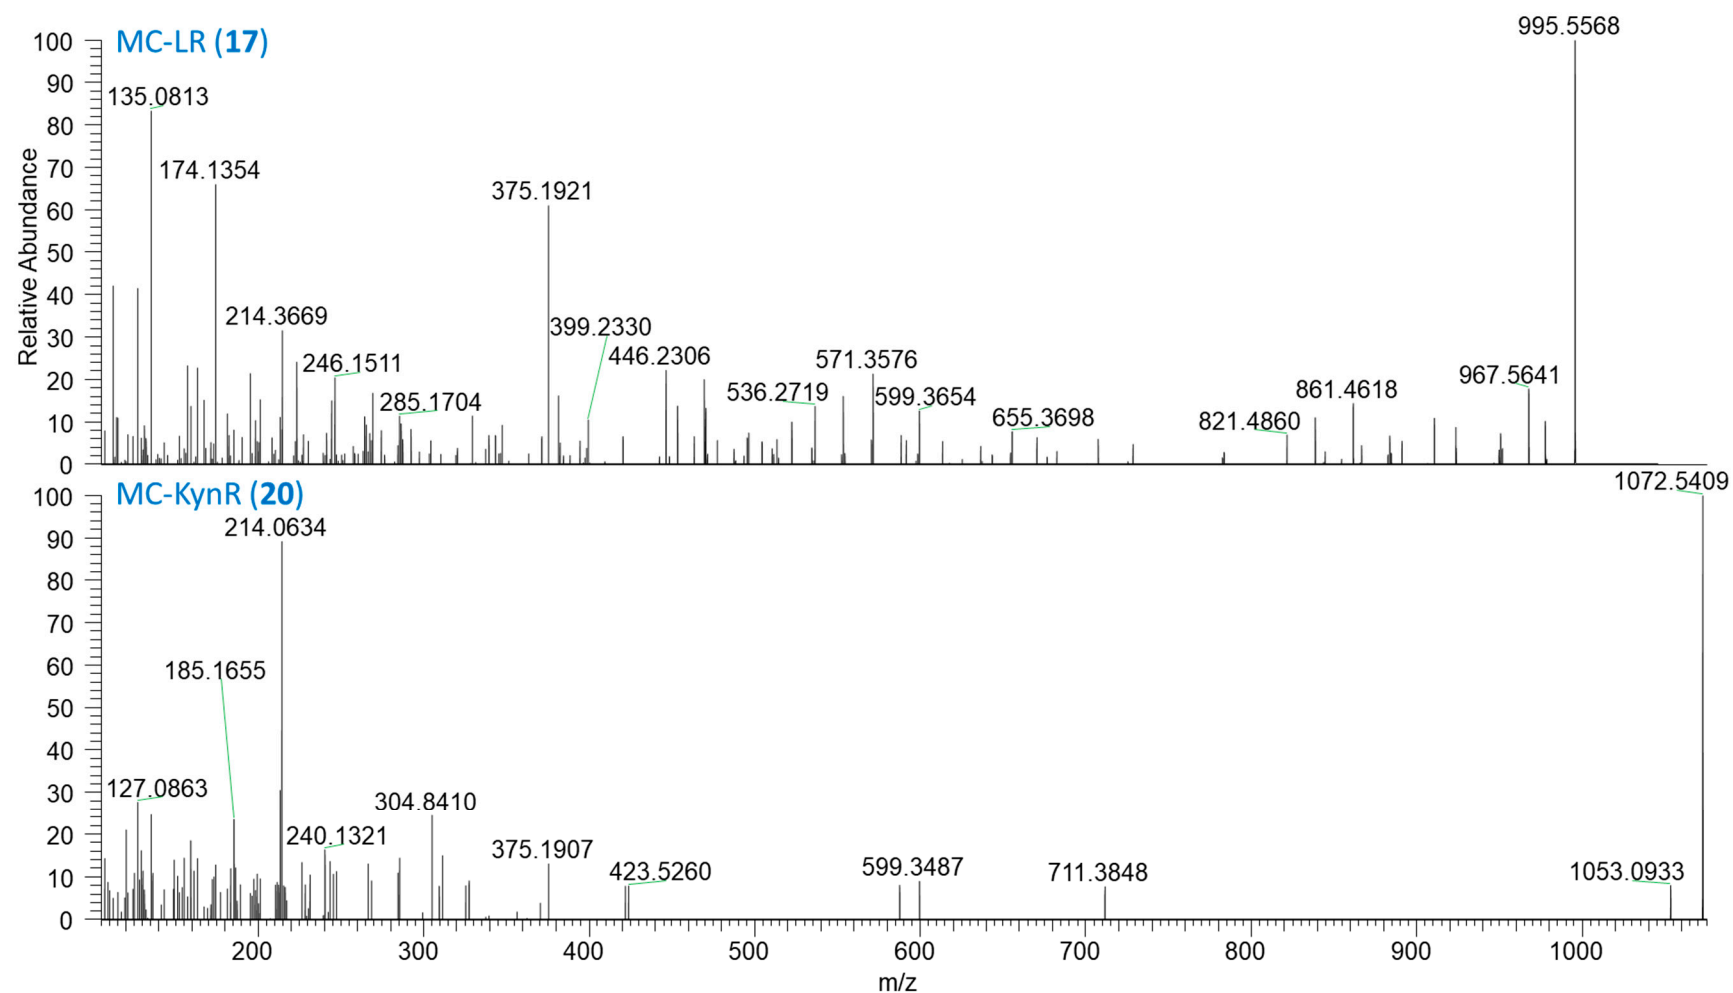

**Figure S13.** LC-HRMS/MS spectra of  $[M+H]^+$  of MC-LR (17), and MC-KynR (20).

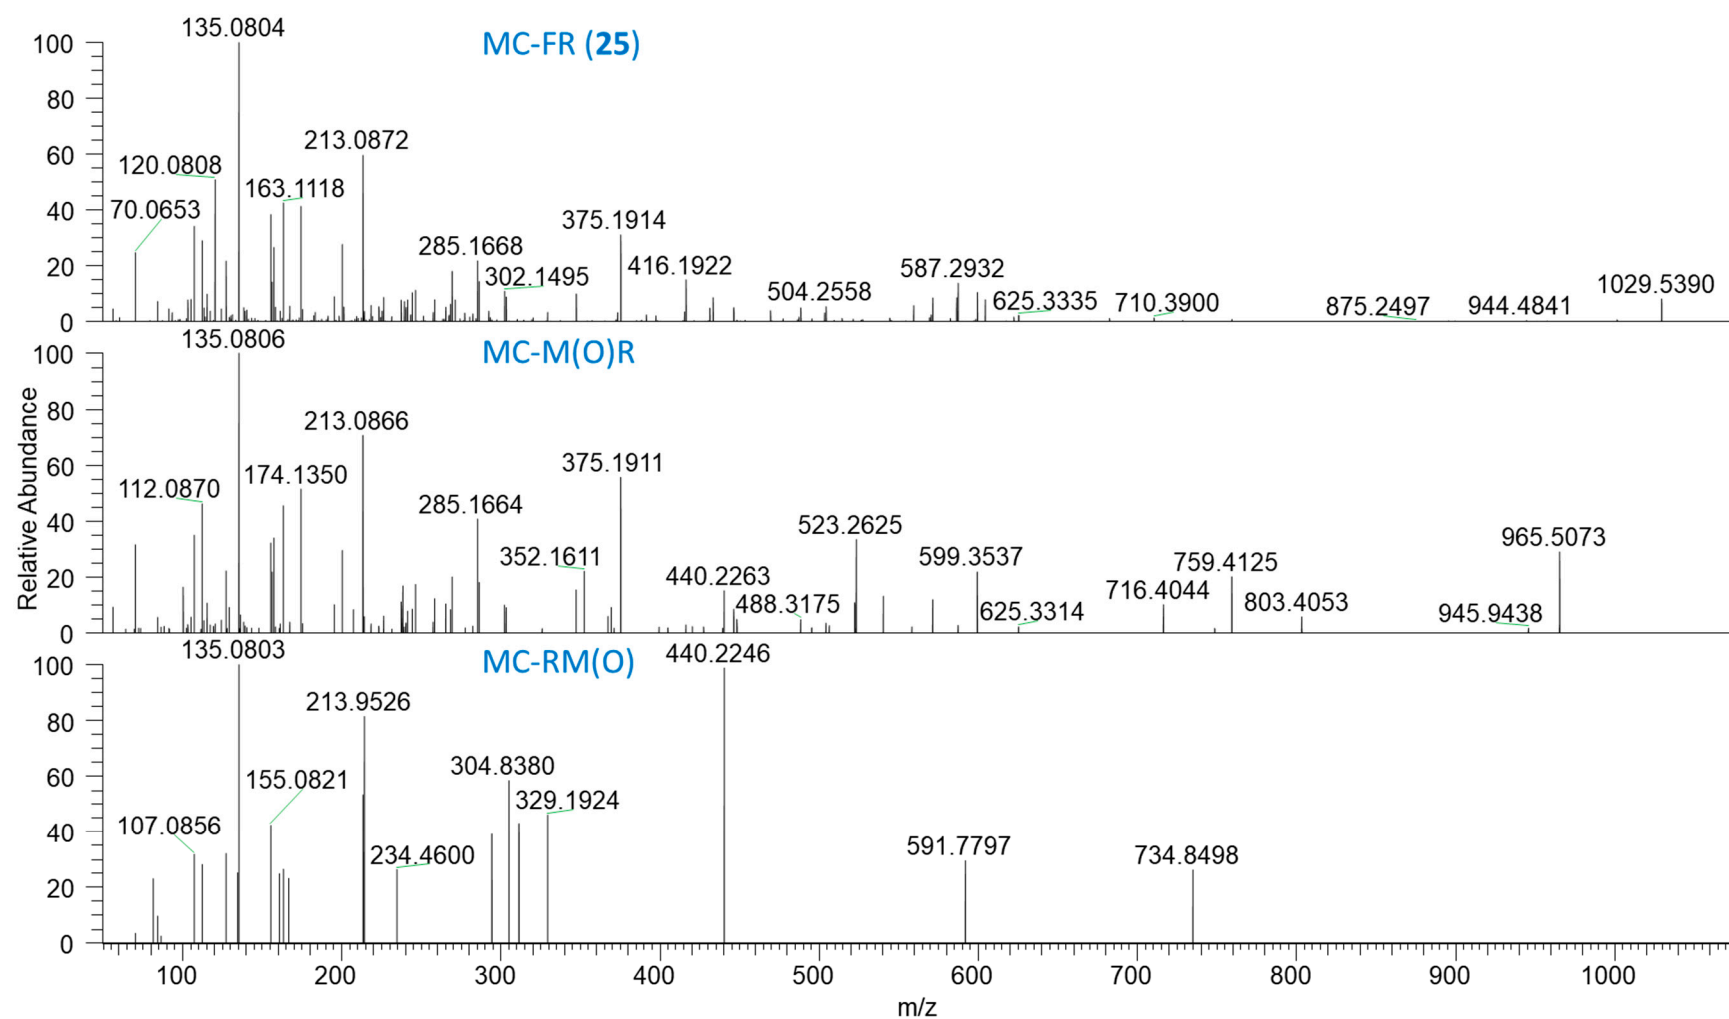

**Figure S14.** LC-HRMS/MS spectra of  $[M+H]^+$  of MC-FR (25), and of MC-M(O)R and MC-RM(O) produced by oxidation of **15** and **31**, respectively, with Oxone/DMSO.

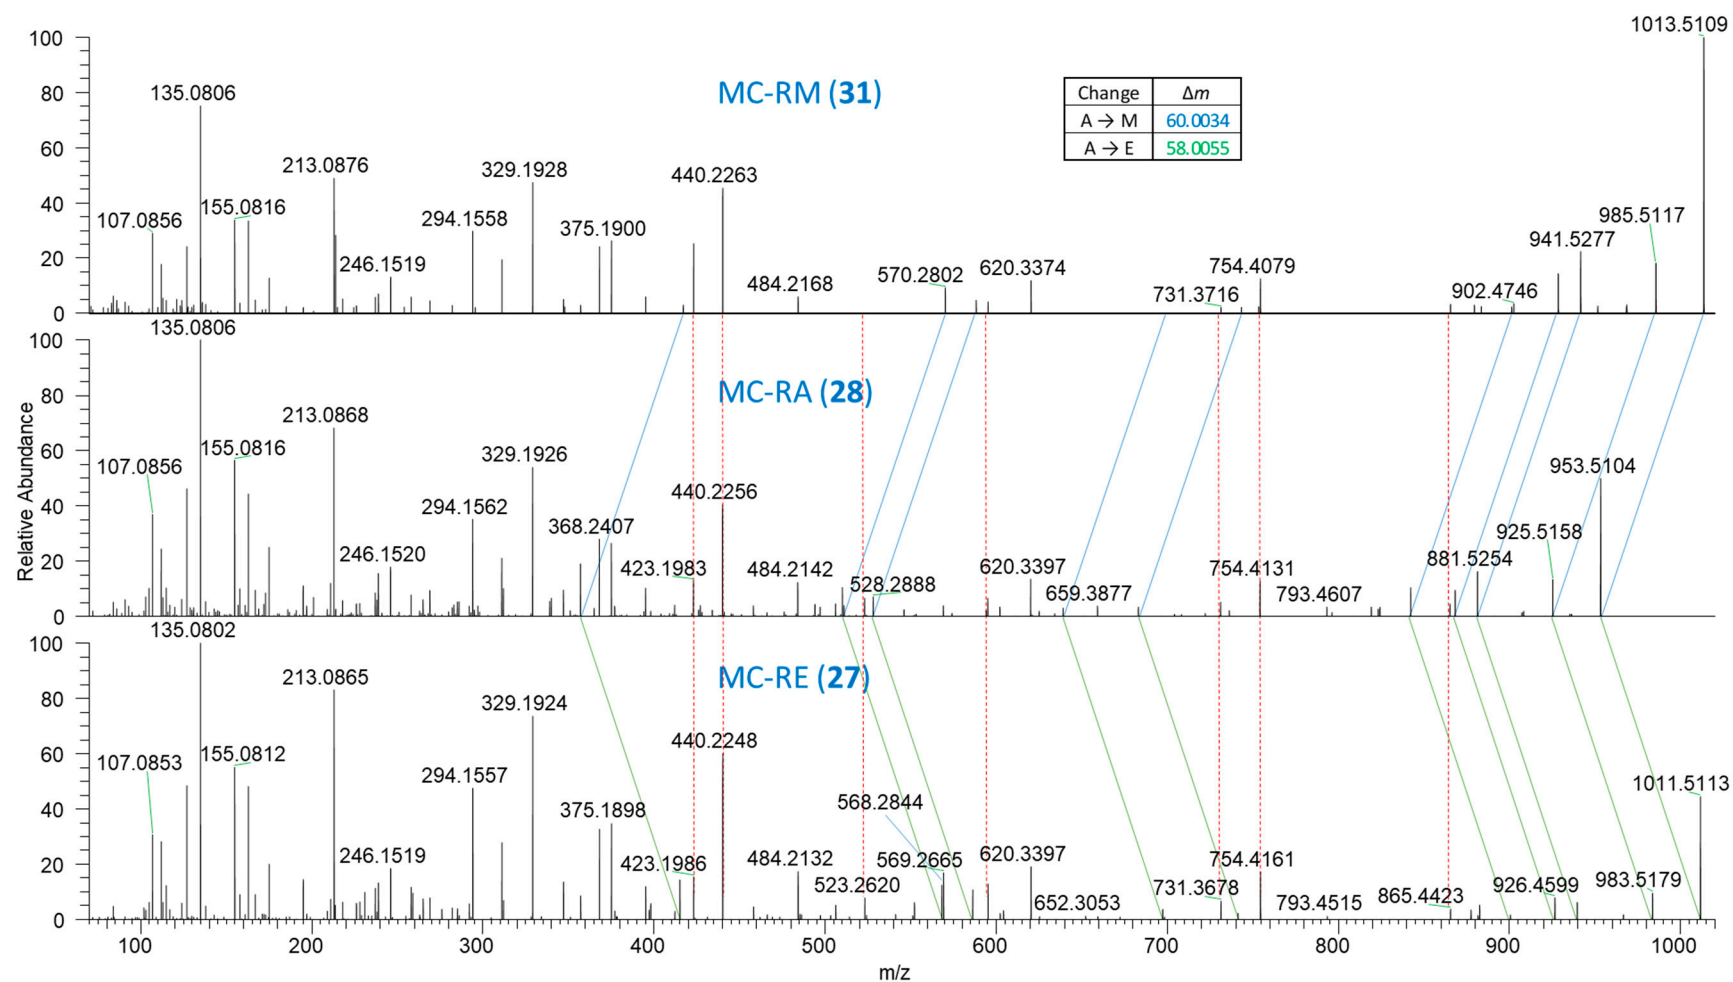

Figure S15. LC-HRMS/MS spectra of  $[M+H]^+$  of MC-RM (31), MC-RA (28), and MC-RE (27).

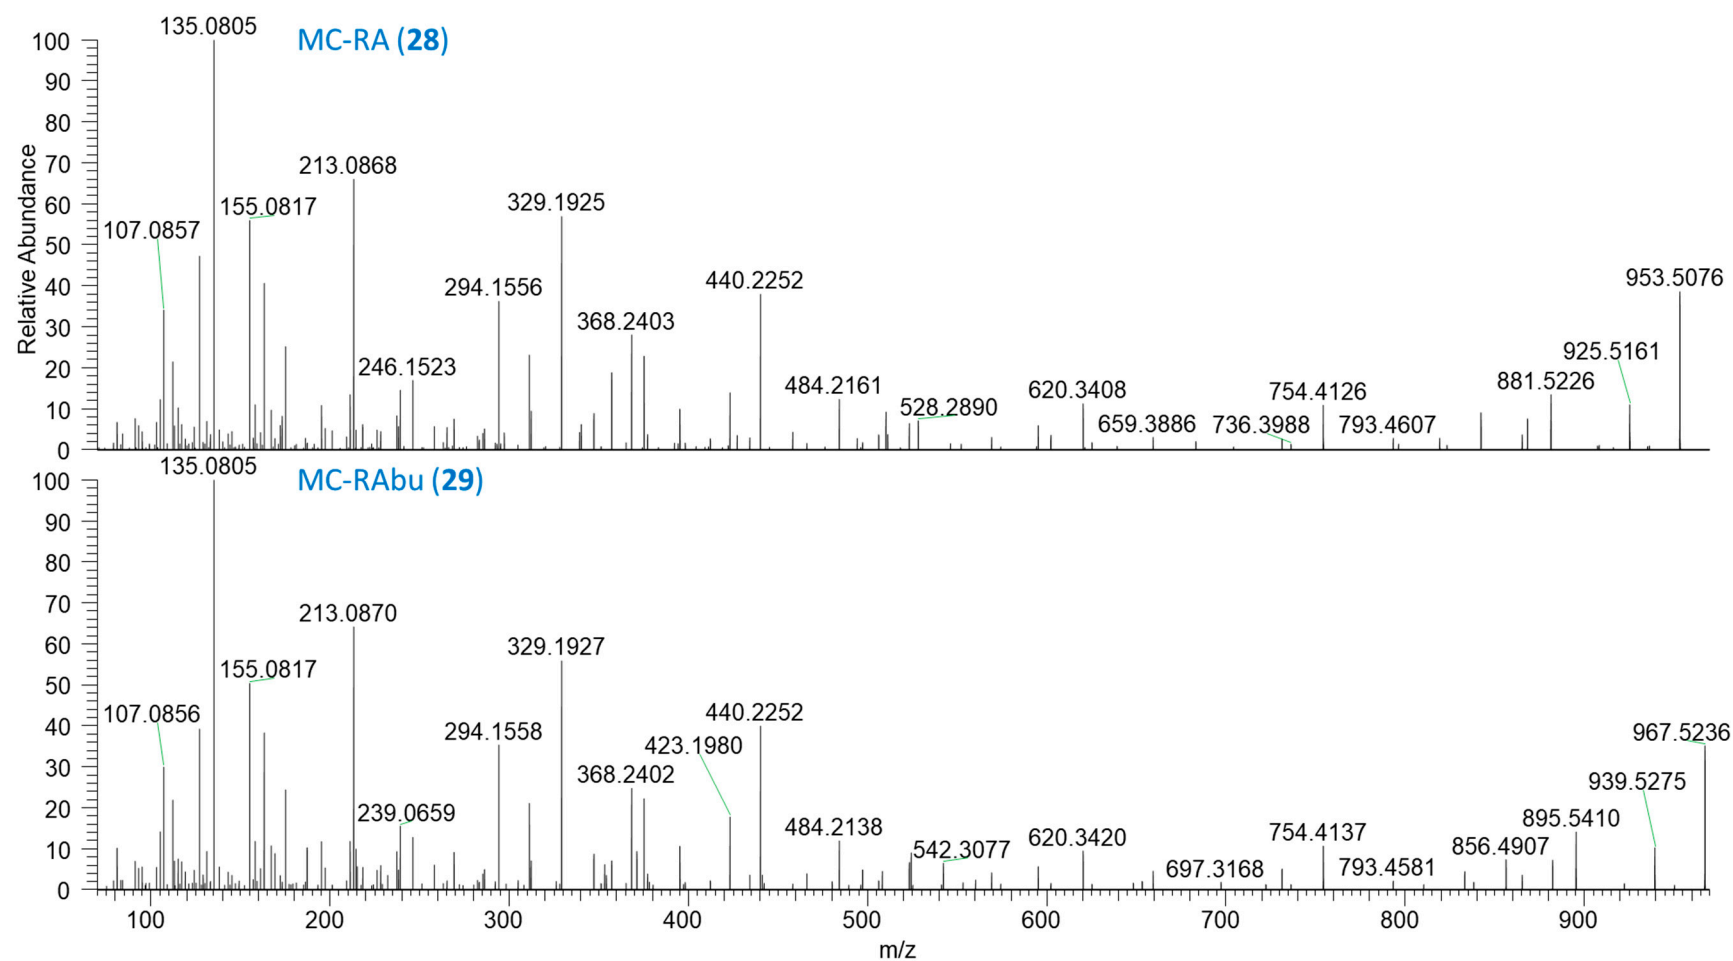

Figure S16. LC-HRMS/MS spectra of  $[M+H]^+$  of MC-RA (28), and MC-RAbu (29).

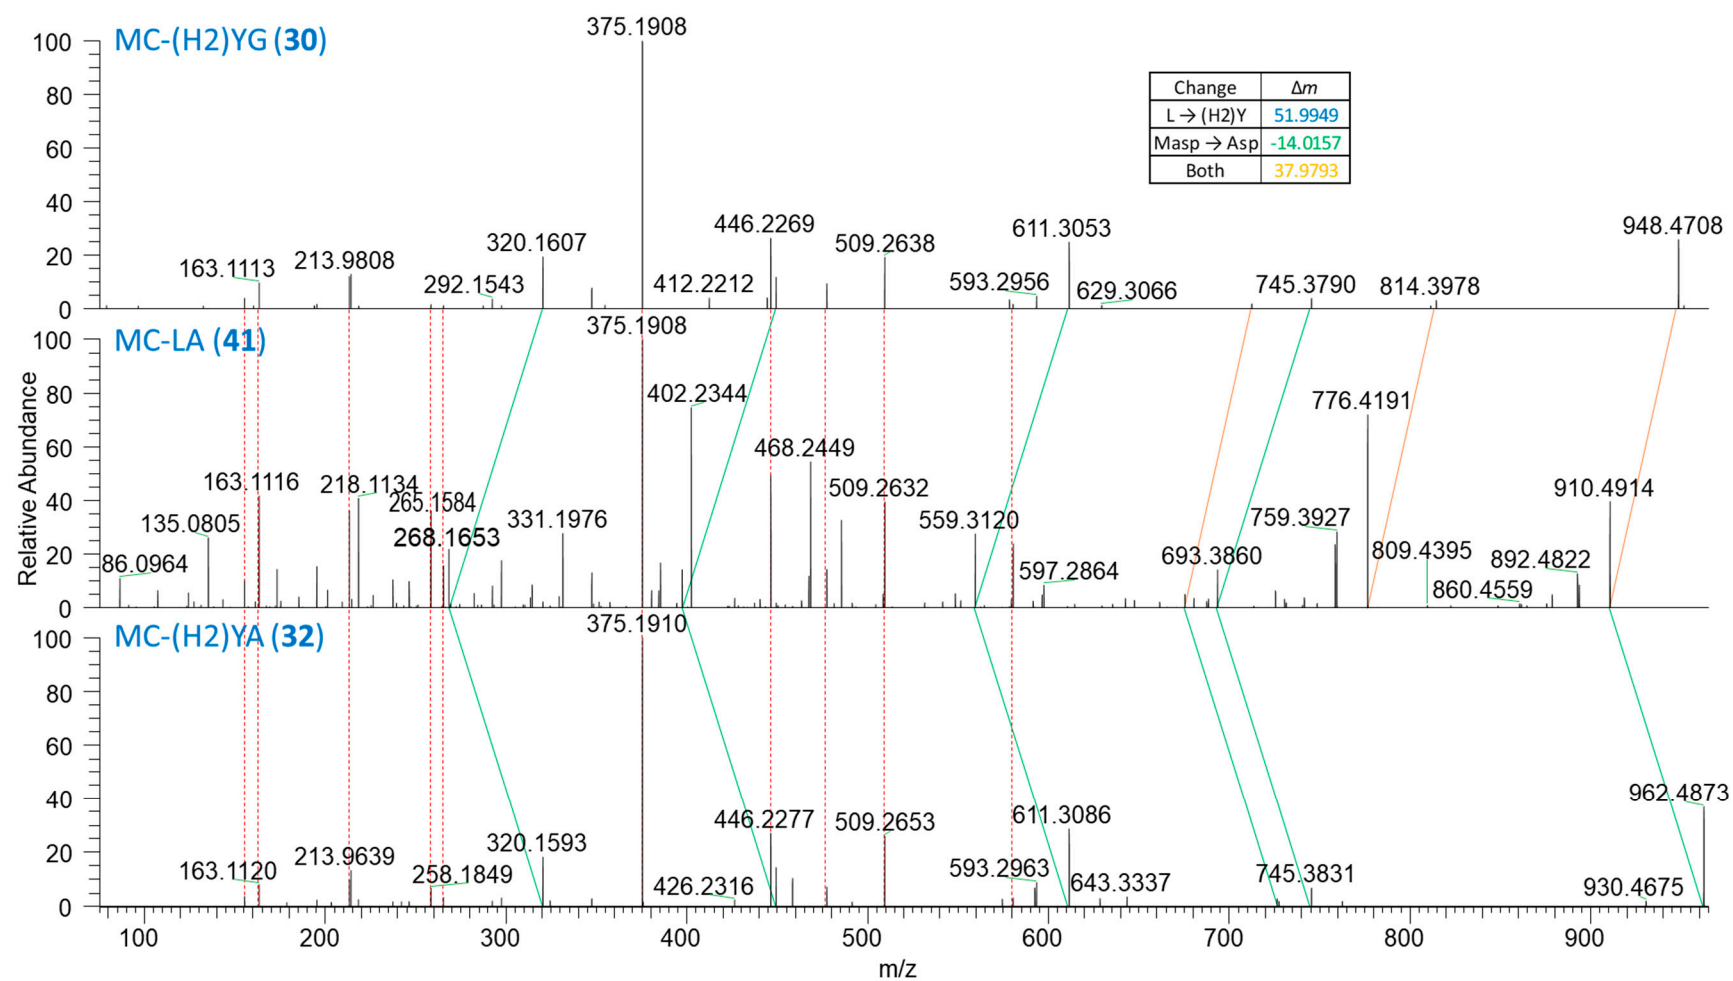

Figure S17. LC-HRMS/MS spectra of  $[M+H]^+$  of MC-(H2)YG (30), MC-LA (41), and MC-(H2)YA (32).

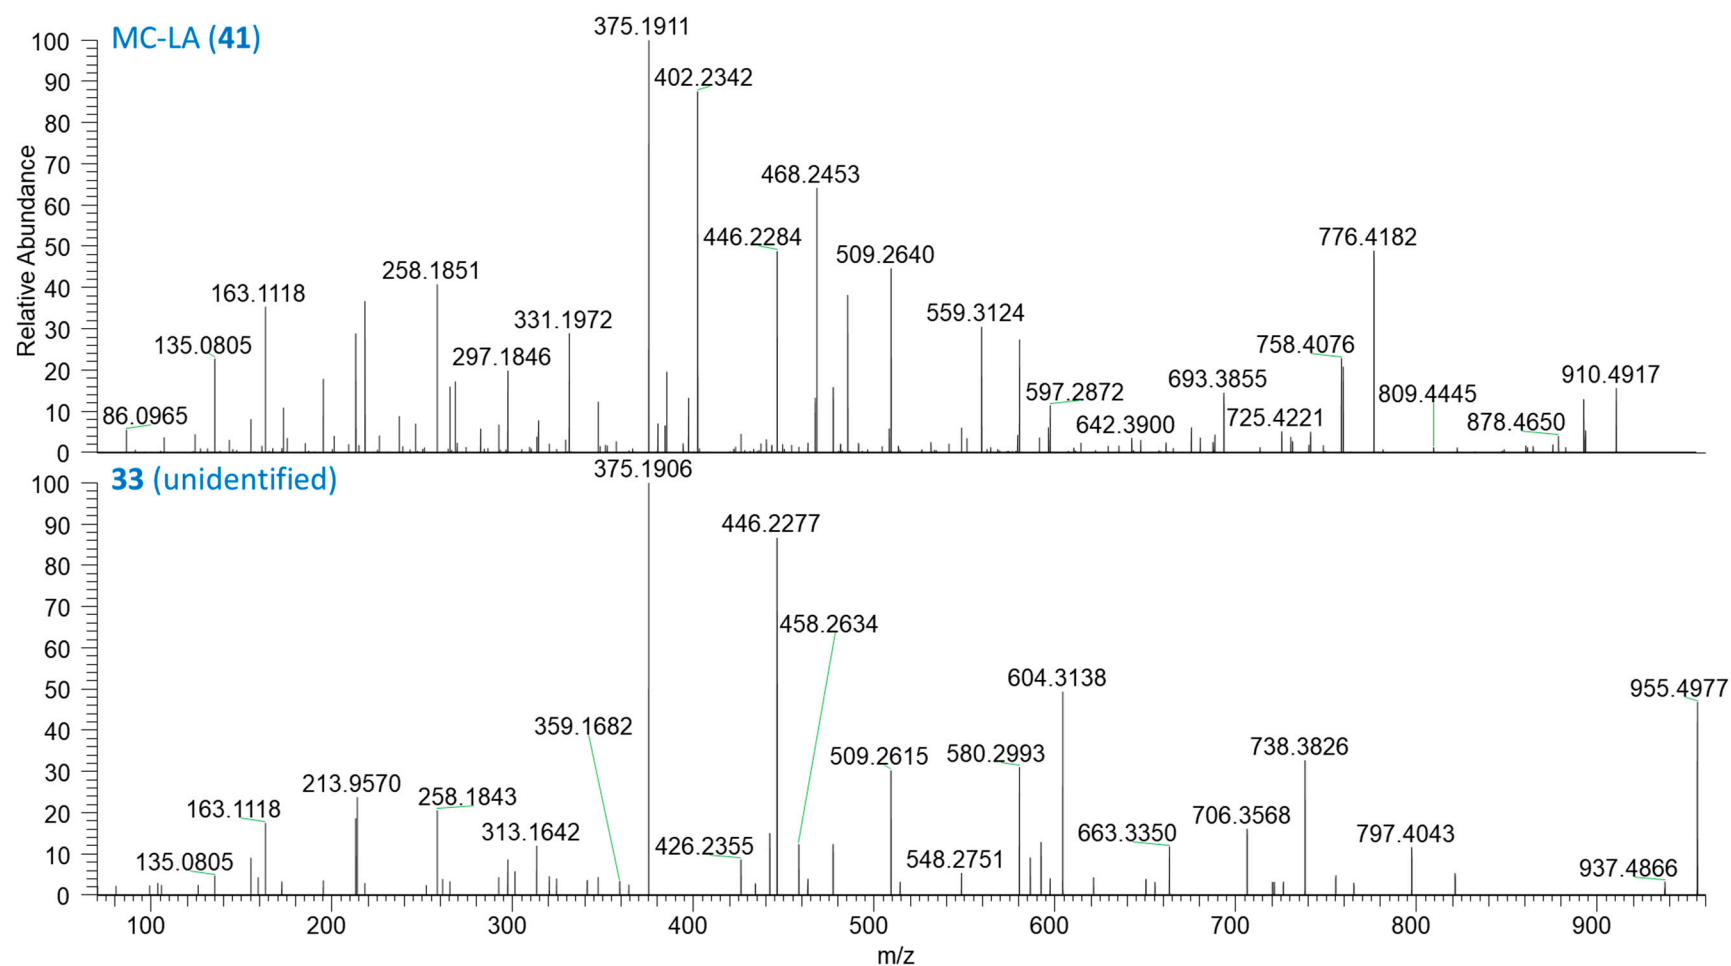

Figure S18. LC-HRMS/MS spectra of  $[M+H]^+$  of MC-LA (41), and unidentified microcystin-33.

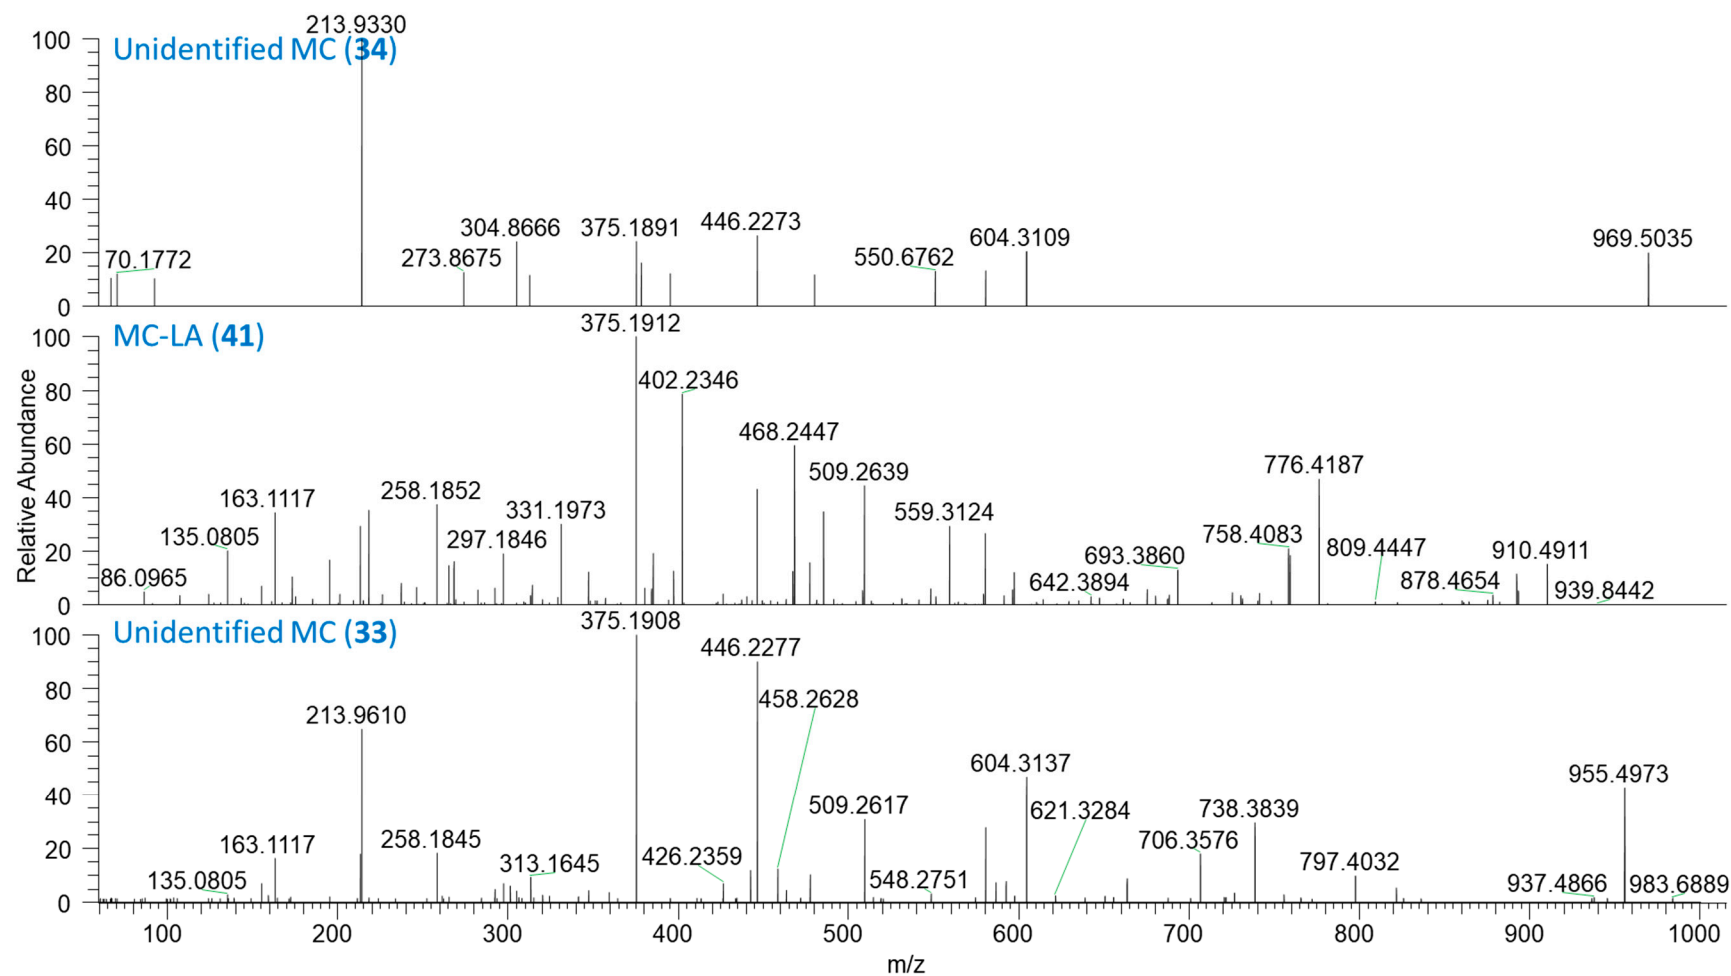

**Figure S19.** LC-HRMS/MS spectra of  $[M+H]^+$  of unidentified microcystin-34, MC-LA (41), and unidentified microcystin-33.



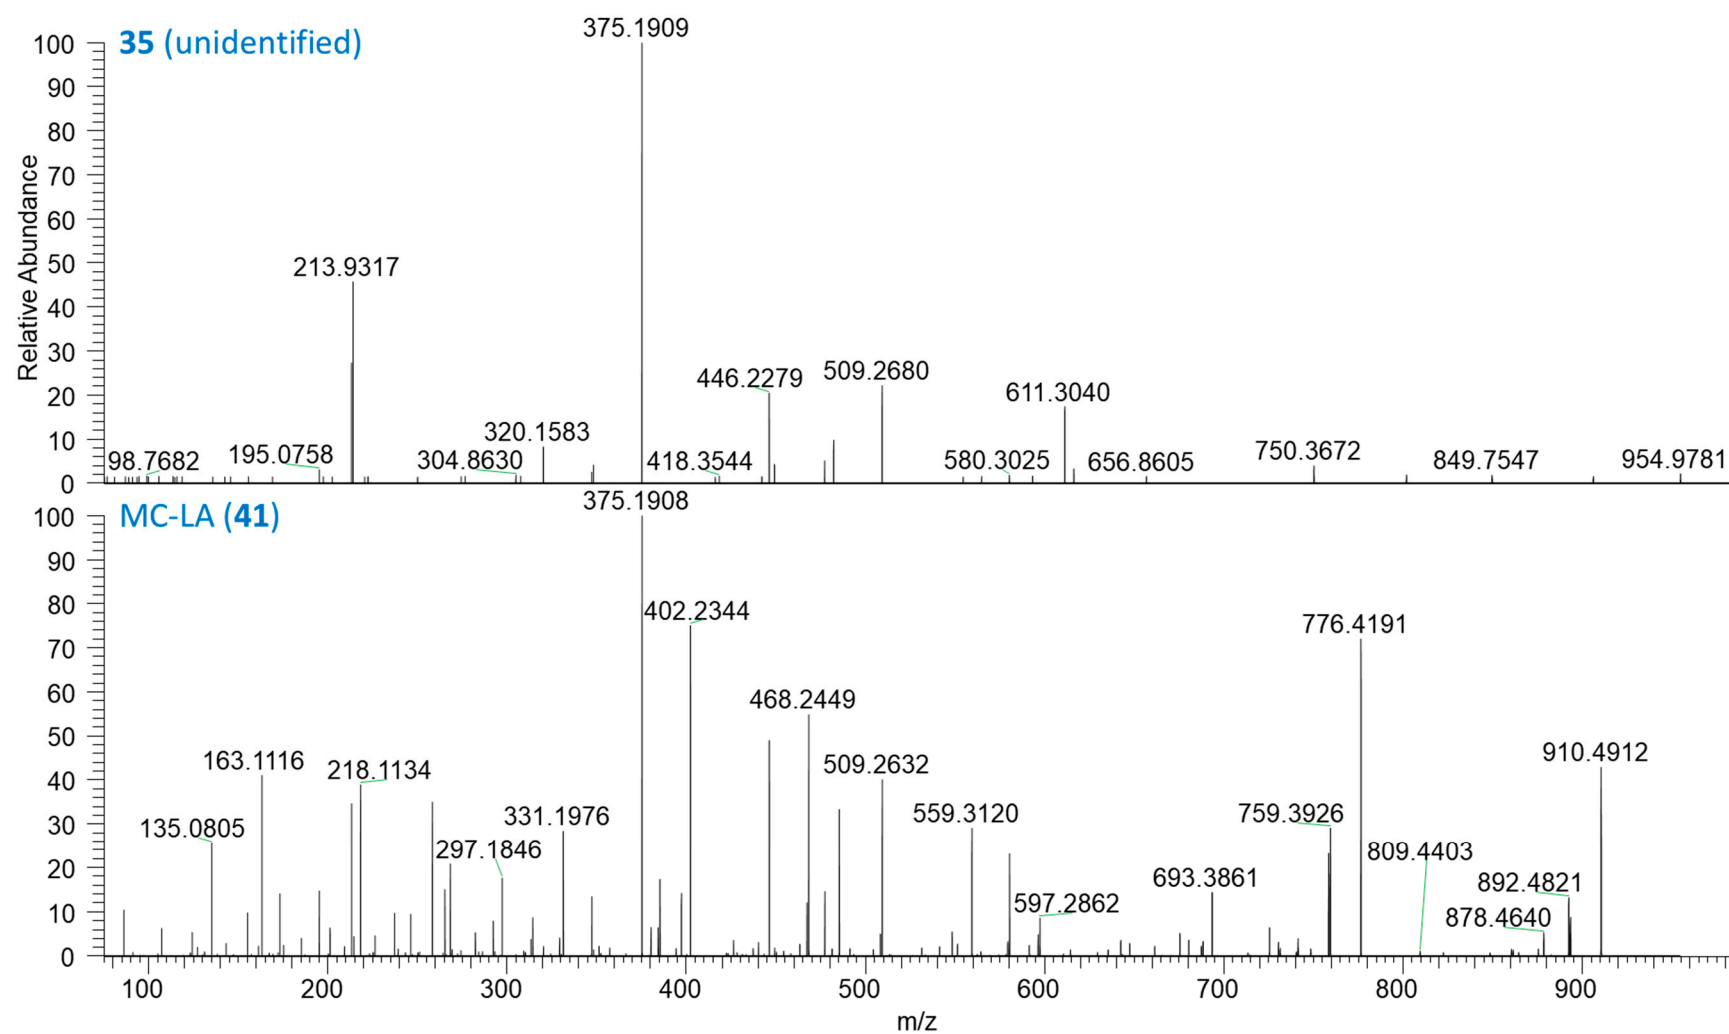

**Figure S20.** LC-HRMS/MS spectra of  $[M+H]^+$  of unidentified microcystin-35, and MC-LA (41).

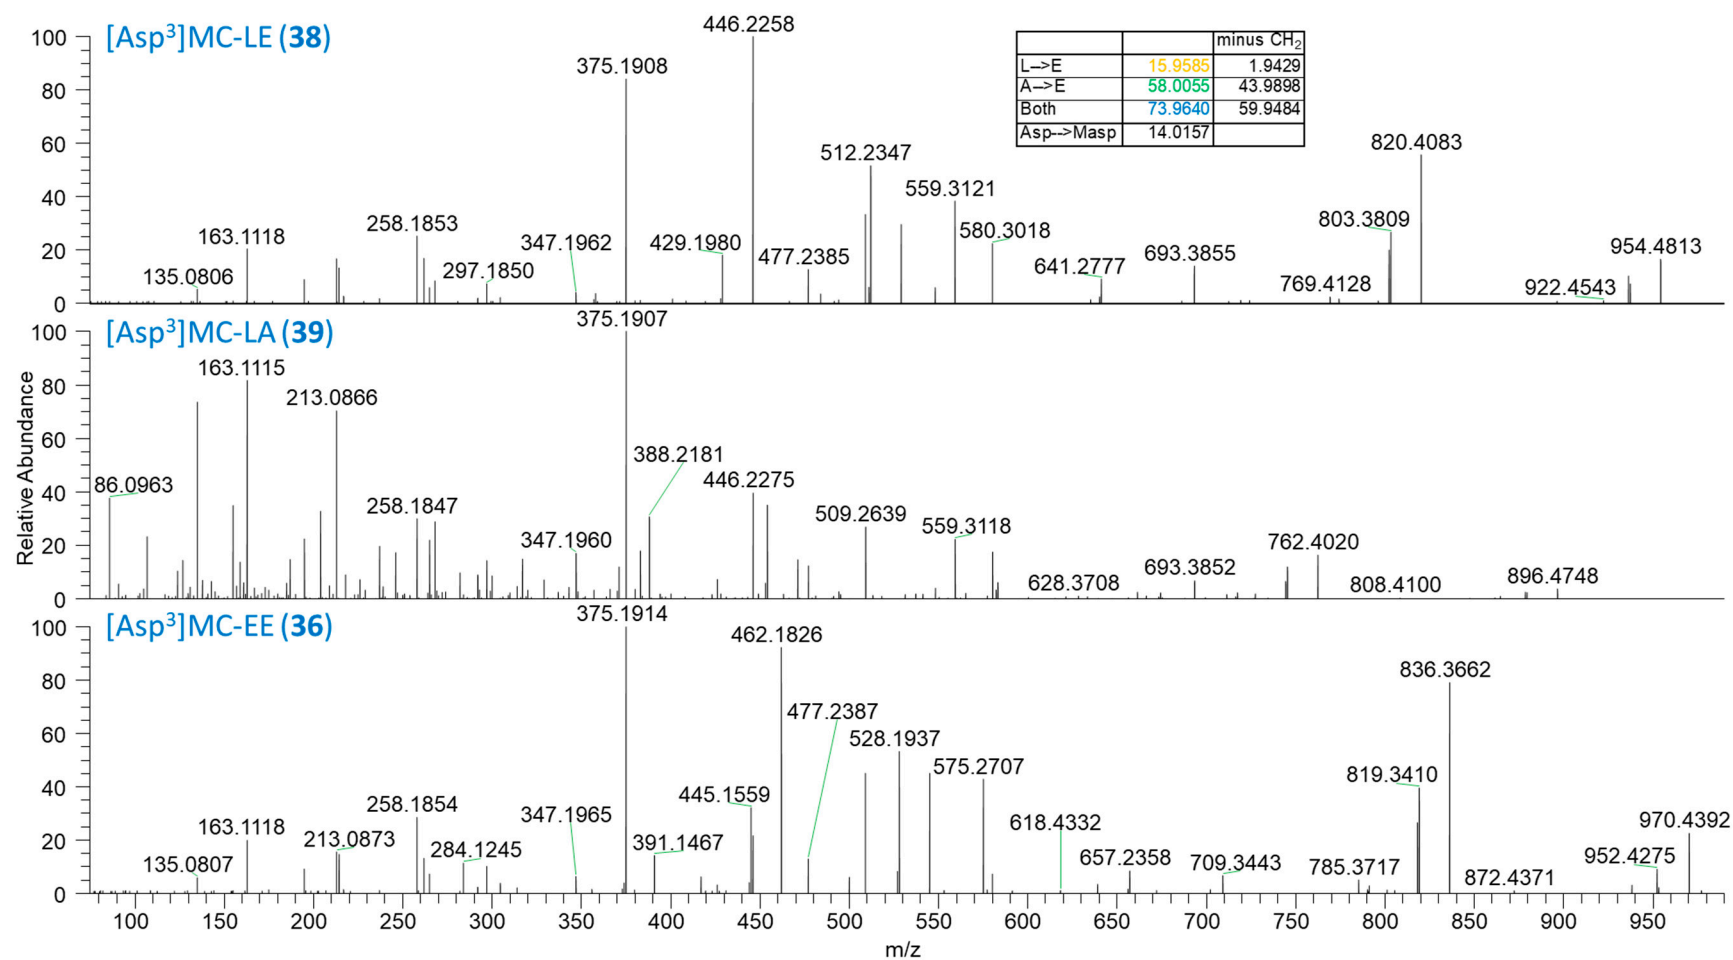

**Figure S21.** LC-HRMS/MS spectra of [M+H]<sup>+</sup> of [D-Asp<sup>3</sup>]MC-LE (38), [D-Asp<sup>3</sup>]MC-LA (39), and [D-Asp<sup>3</sup>]MC-EE (36).

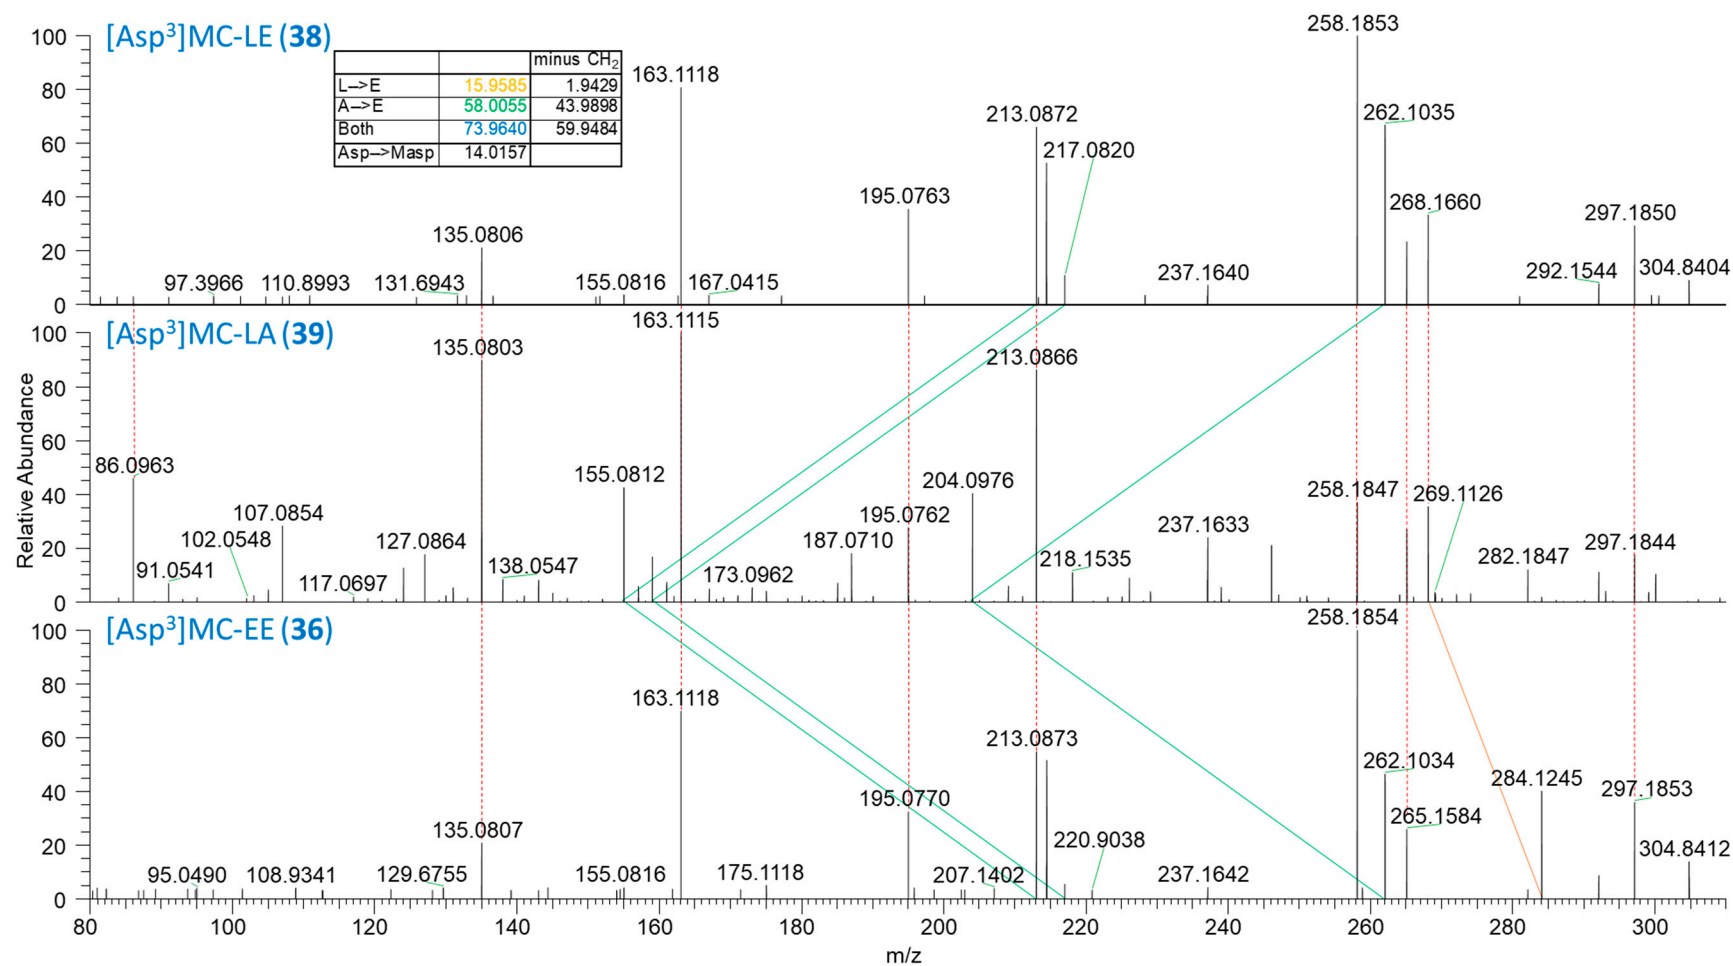

**Figure S22.** Expansion of LC–HRMS/MS spectra of [M+H]<sup>+</sup> of [D-Asp<sup>3</sup>]MC-LE (38), [D-Asp<sup>3</sup>]MC-LA (39), and [D-Asp<sup>3</sup>]MC-EE (36).

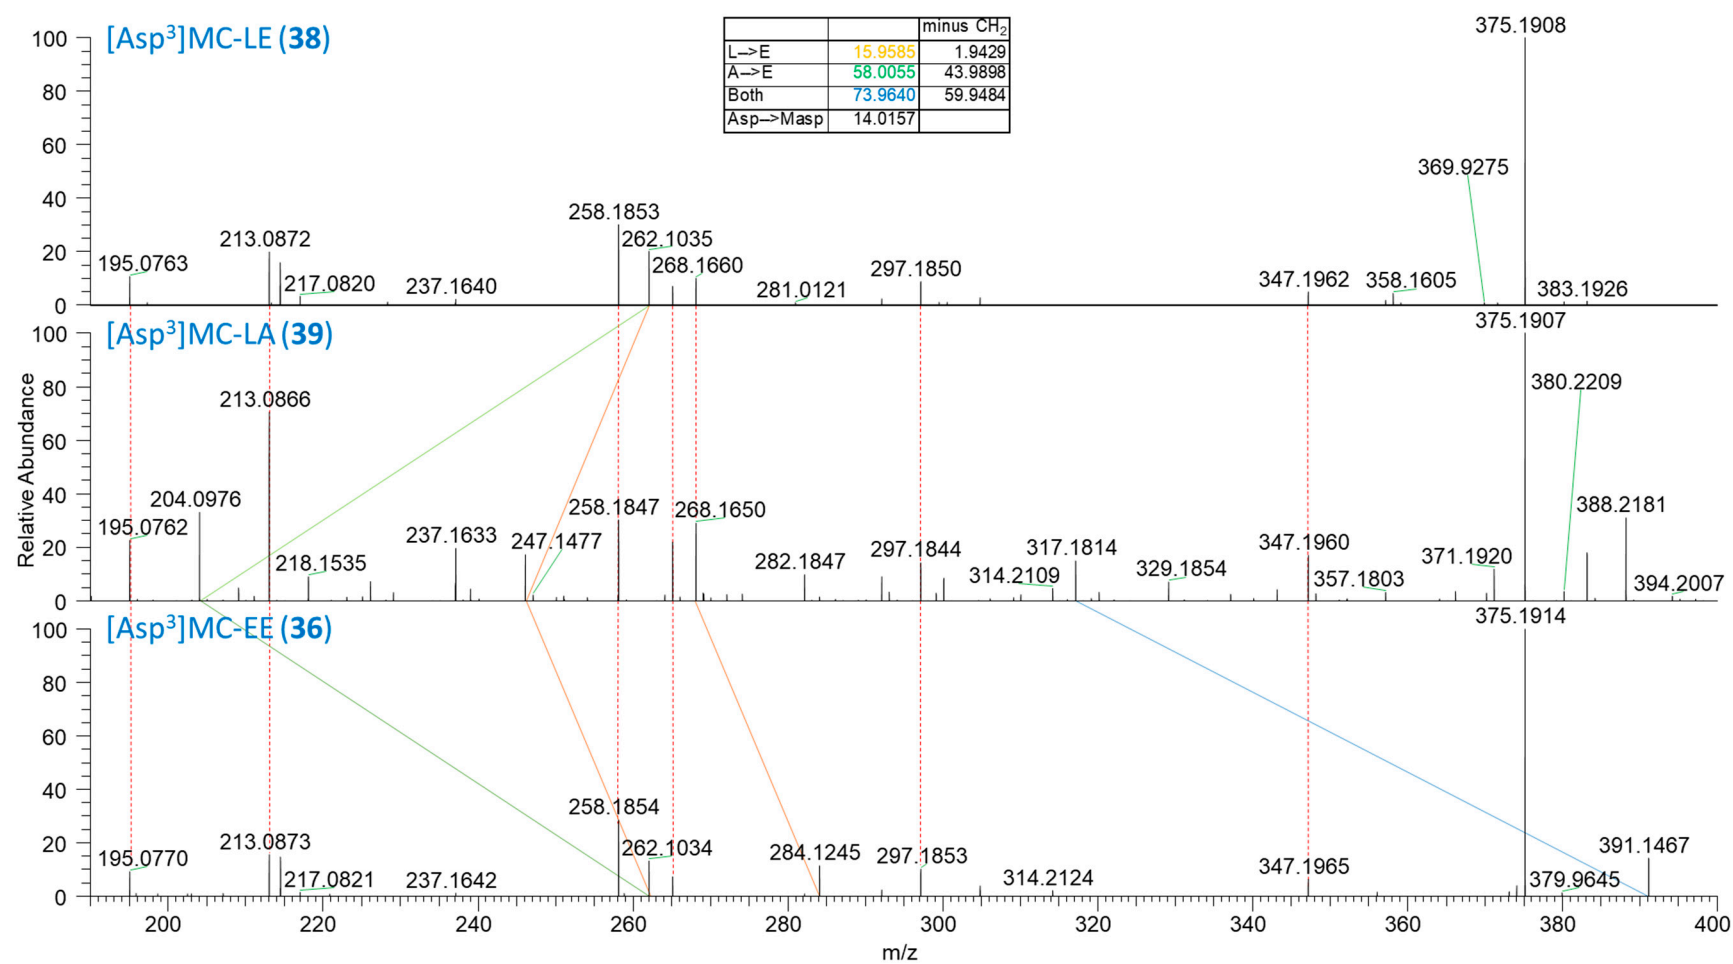

**Figure S23.** Expansion of LC-HRMS/MS spectra of  $[M+H]^+$  of  $[D\text{-Asp}^3]\text{MC-LE}$  (38),  $[D\text{-Asp}^3]\text{MC-LA}$  (39), and  $[D\text{-Asp}^3]\text{MC-EE}$  (36).

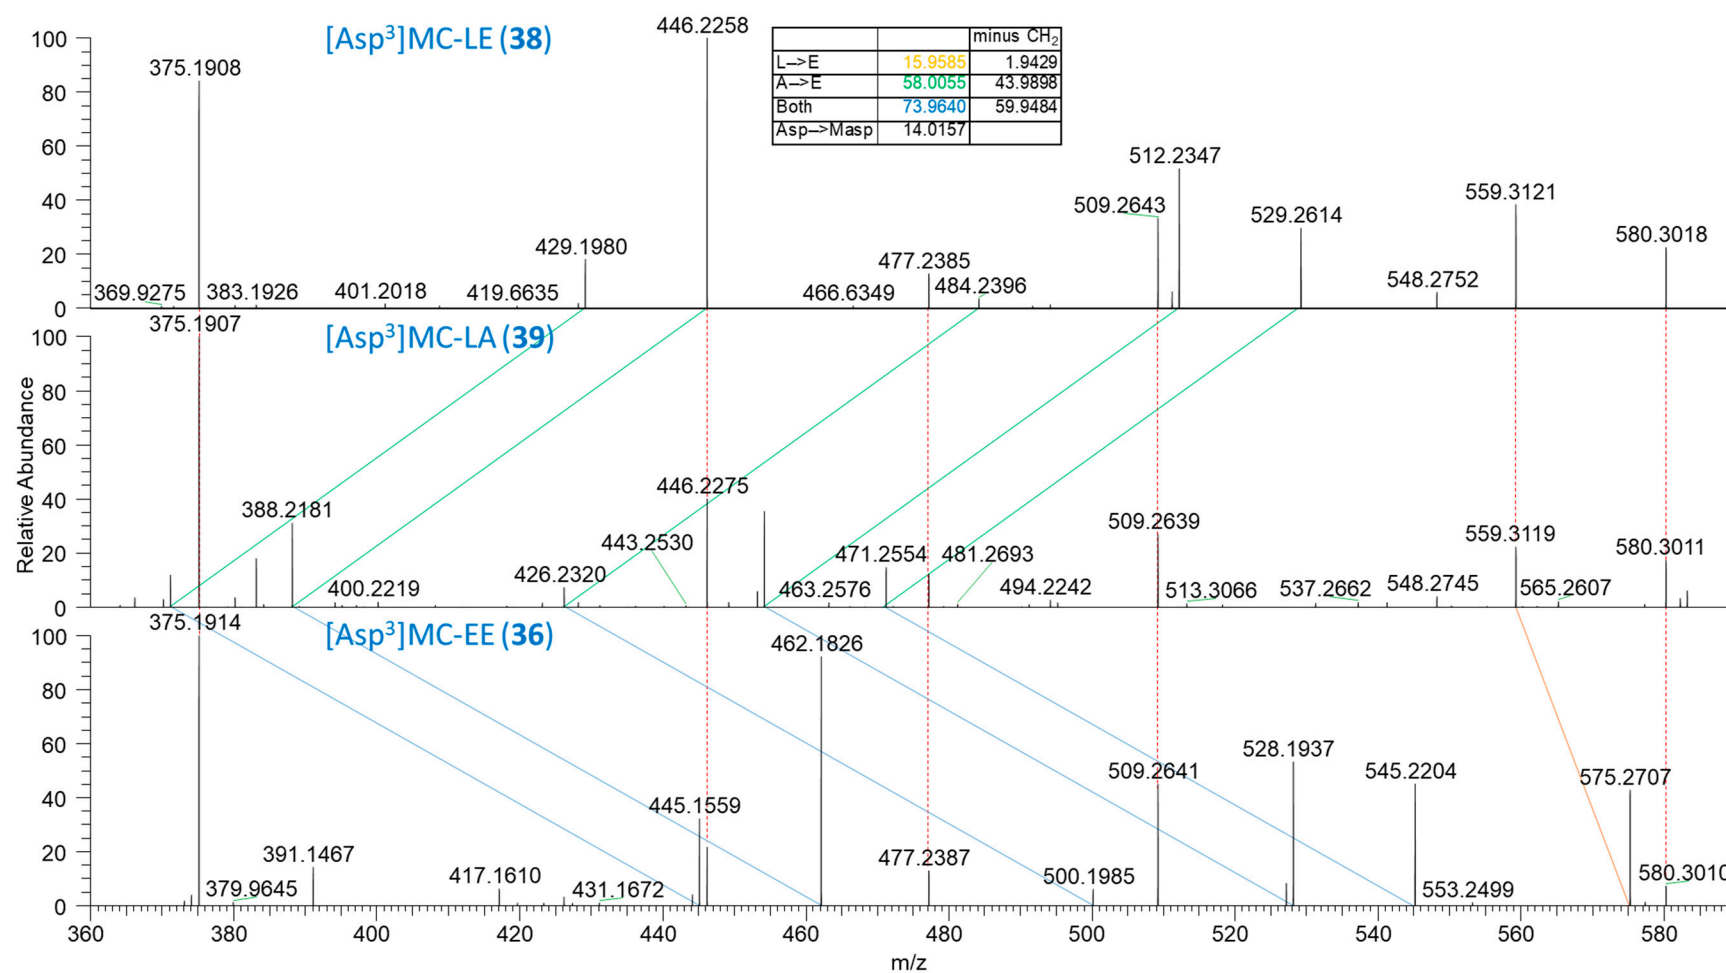

**Figure S24.** Expansion of LC-HRMS/MS spectra of [M+H]<sup>+</sup> of [D-Asp<sup>3</sup>]MC-LE (38), [D-Asp<sup>3</sup>]MC-LA (39), and [D-Asp<sup>3</sup>]MC-EE (36).

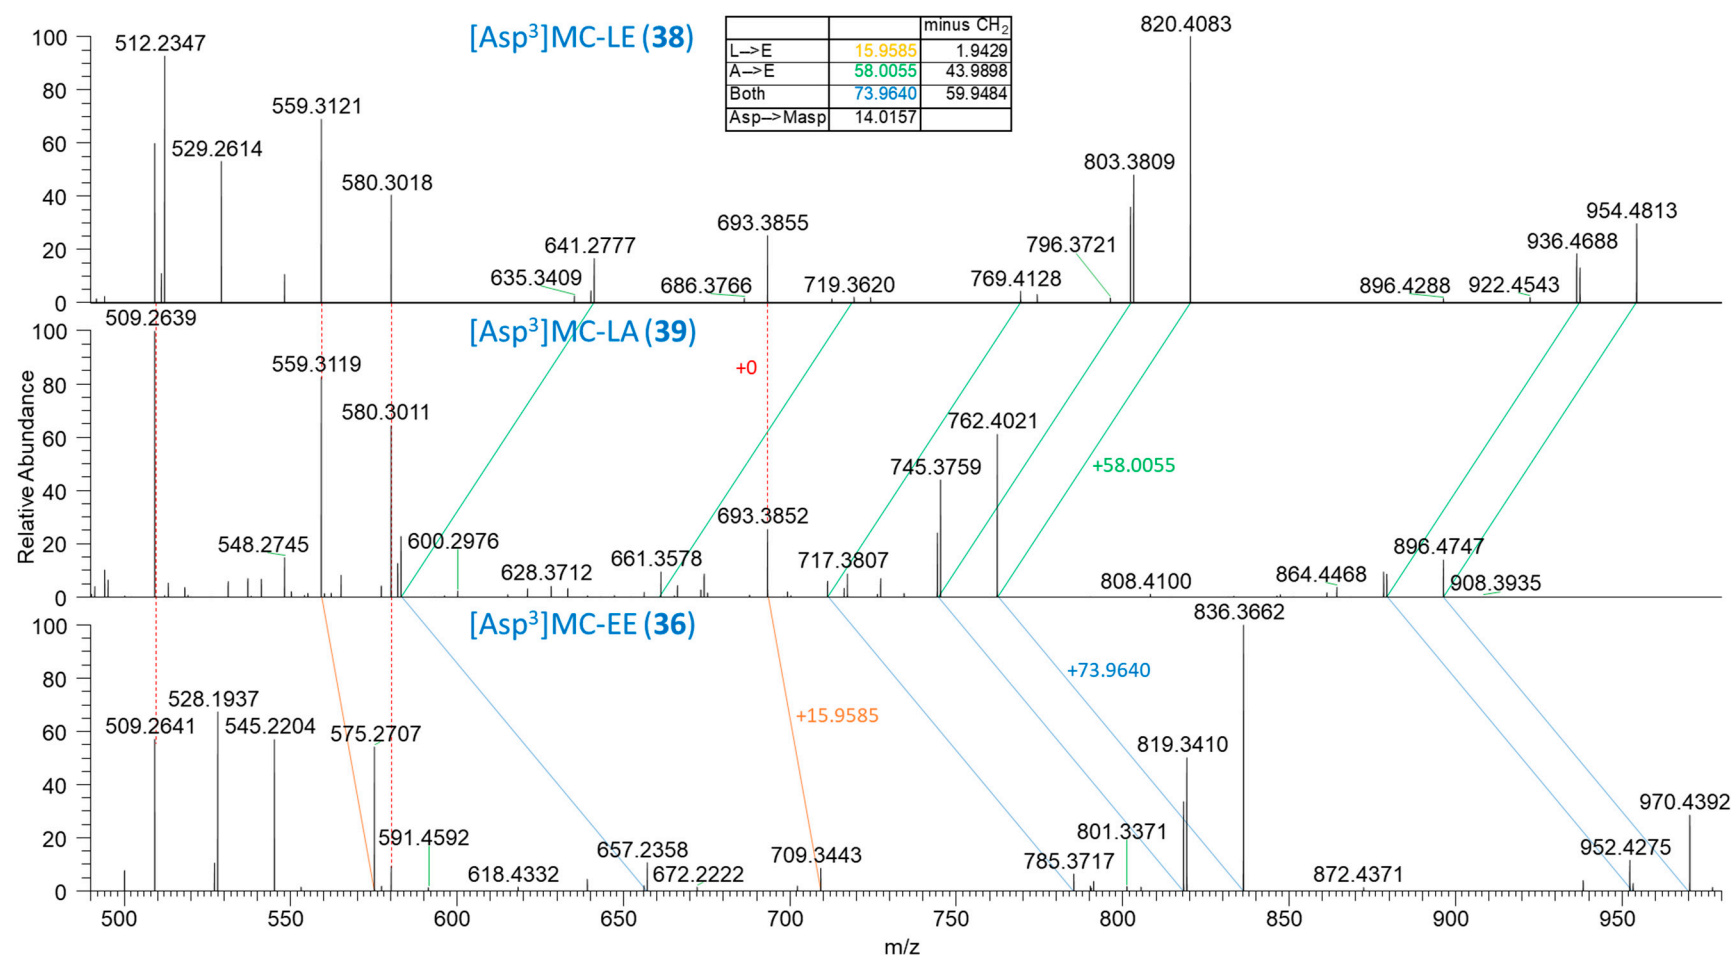

**Figure S25.** Expansion of LC-HRMS/MS spectra of [M+H]<sup>+</sup> of [D-Asp<sup>3</sup>]MC-LE (38), [D-Asp<sup>3</sup>]MC-LA (39), and [D-Asp<sup>3</sup>]MC-EE (36).

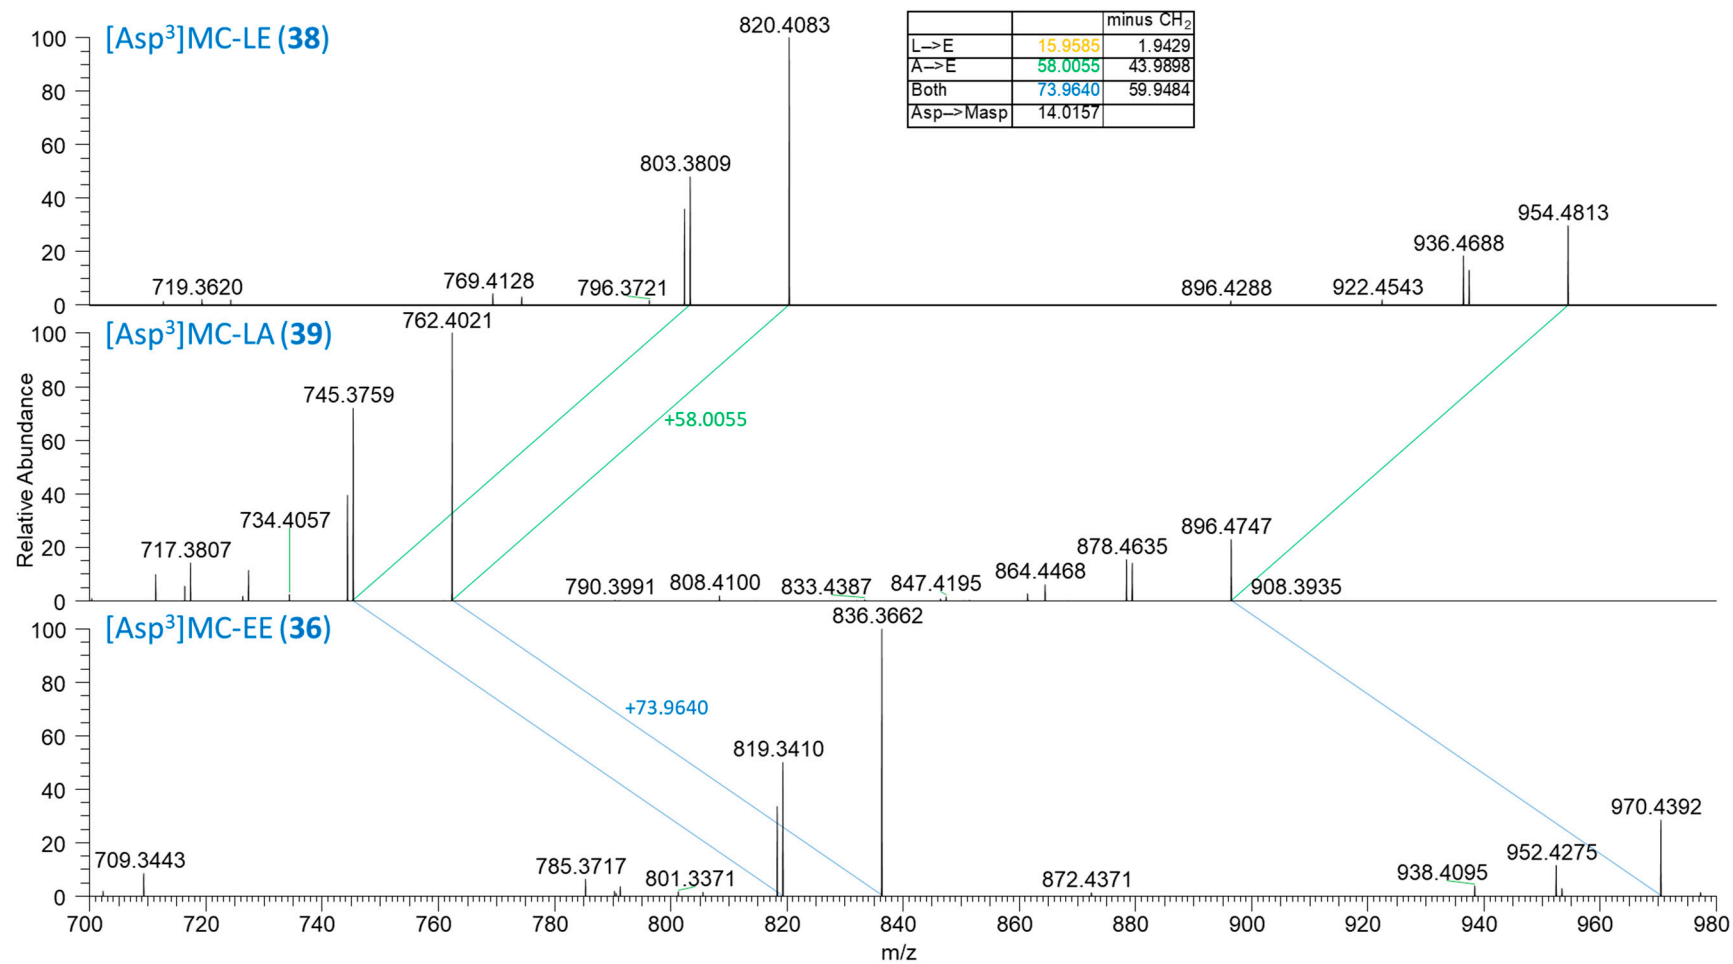

**Figure S26.** Expansion of LC-HRMS/MS spectra of  $[M+H]^+$  of  $[D\text{-}Asp^3]MC\text{-}LE$  (38),  $[D\text{-}Asp^3]MC\text{-}LA$  (39), and  $[D\text{-}Asp^3]MC\text{-}EE$  (36).



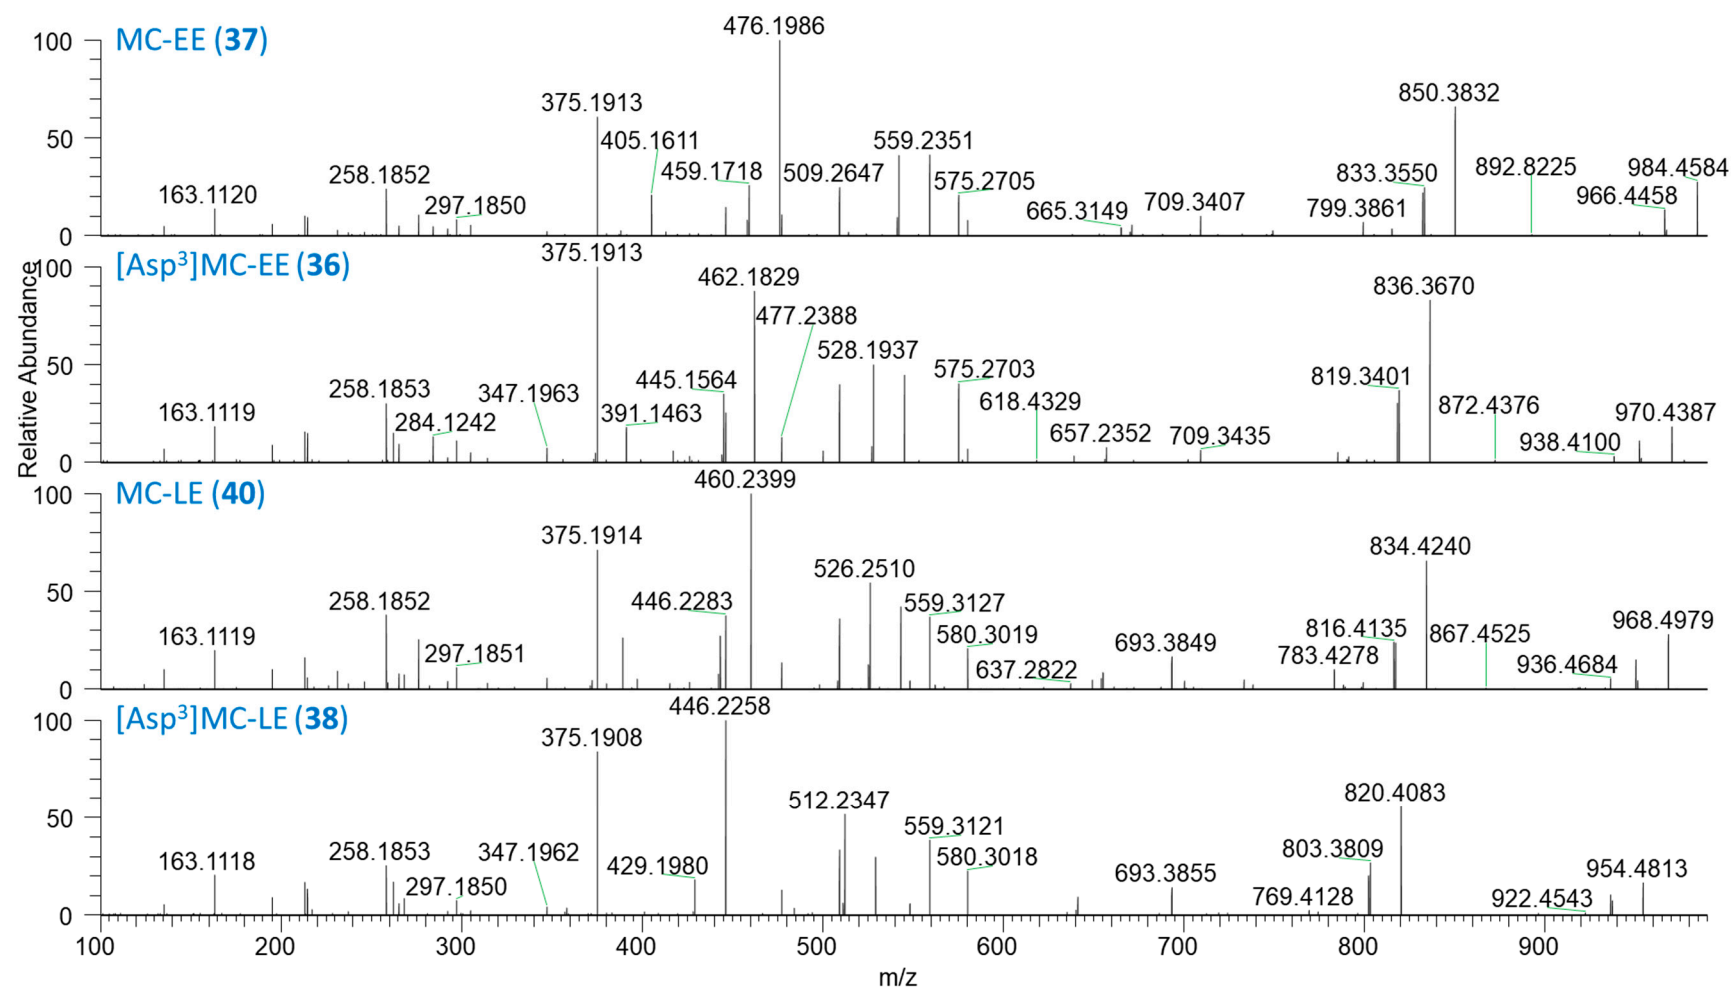

**Figure S27.** LC-HRMS/MS spectra of  $[M+H]^+$  of MC-EE (37),  $[D\text{-}Asp^3]MC\text{-}EE$  (36), MC-LE (40), and  $[D\text{-}Asp^3]MC\text{-}LE$  (38).



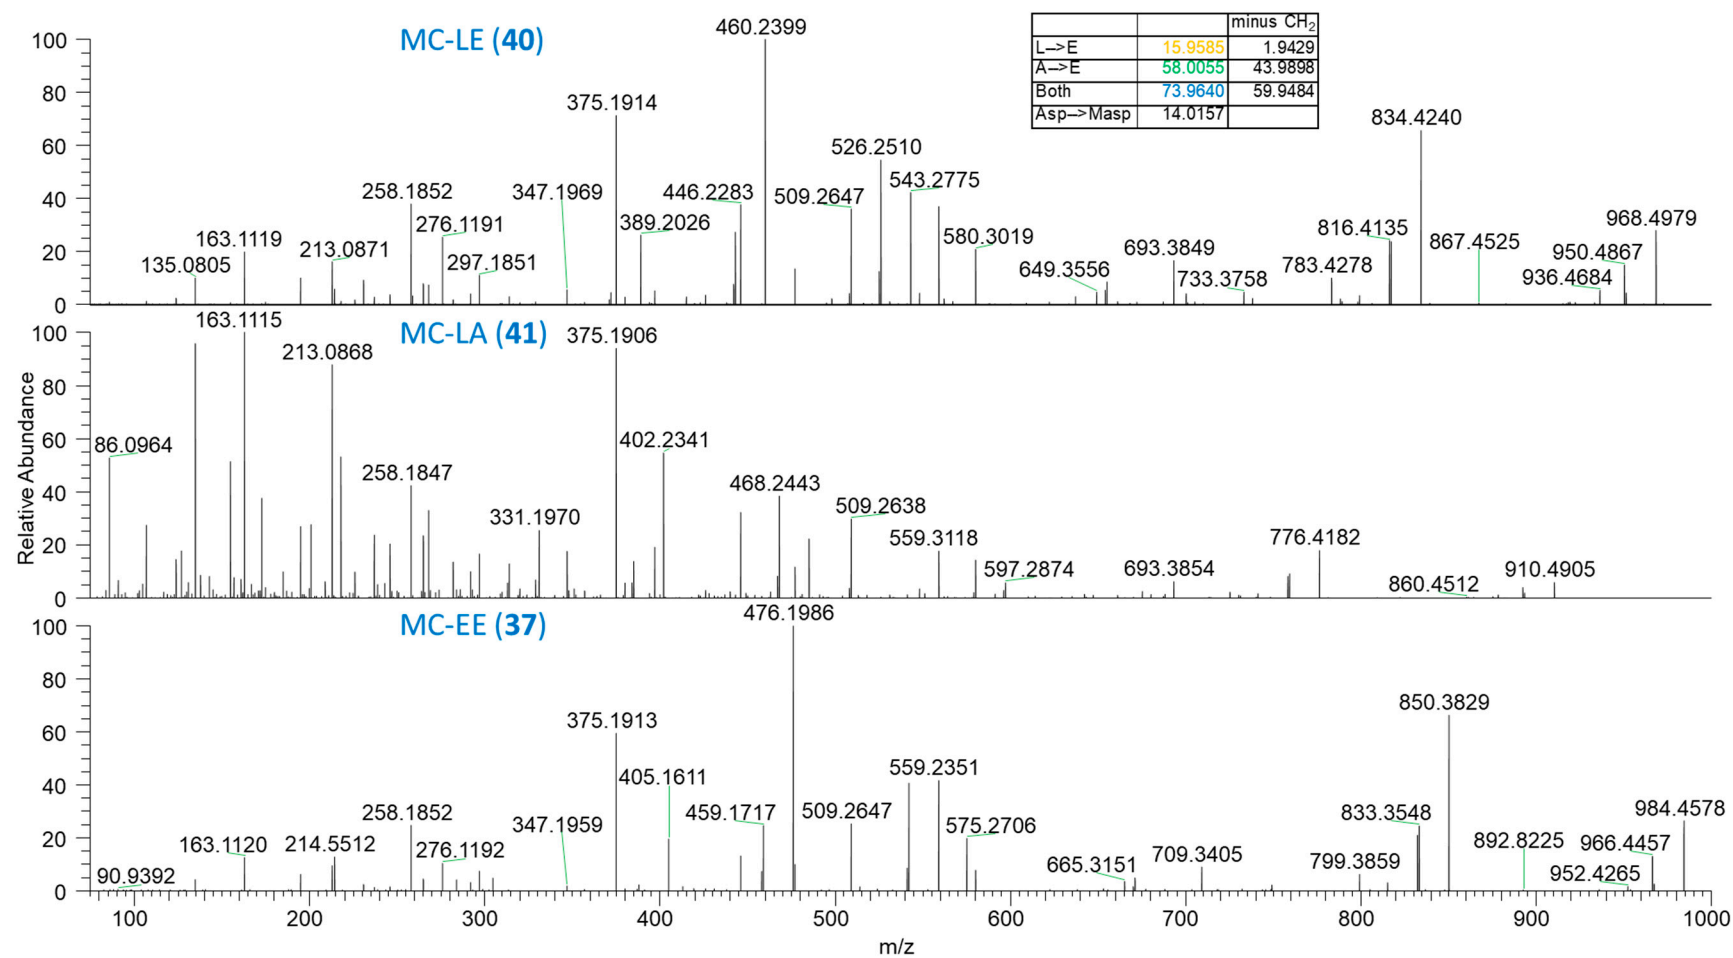

Figure S28. LC-HRMS/MS spectra of [M+H]<sup>+</sup> of MC-LE (40), MC-LA (41), and MC-EE (37).

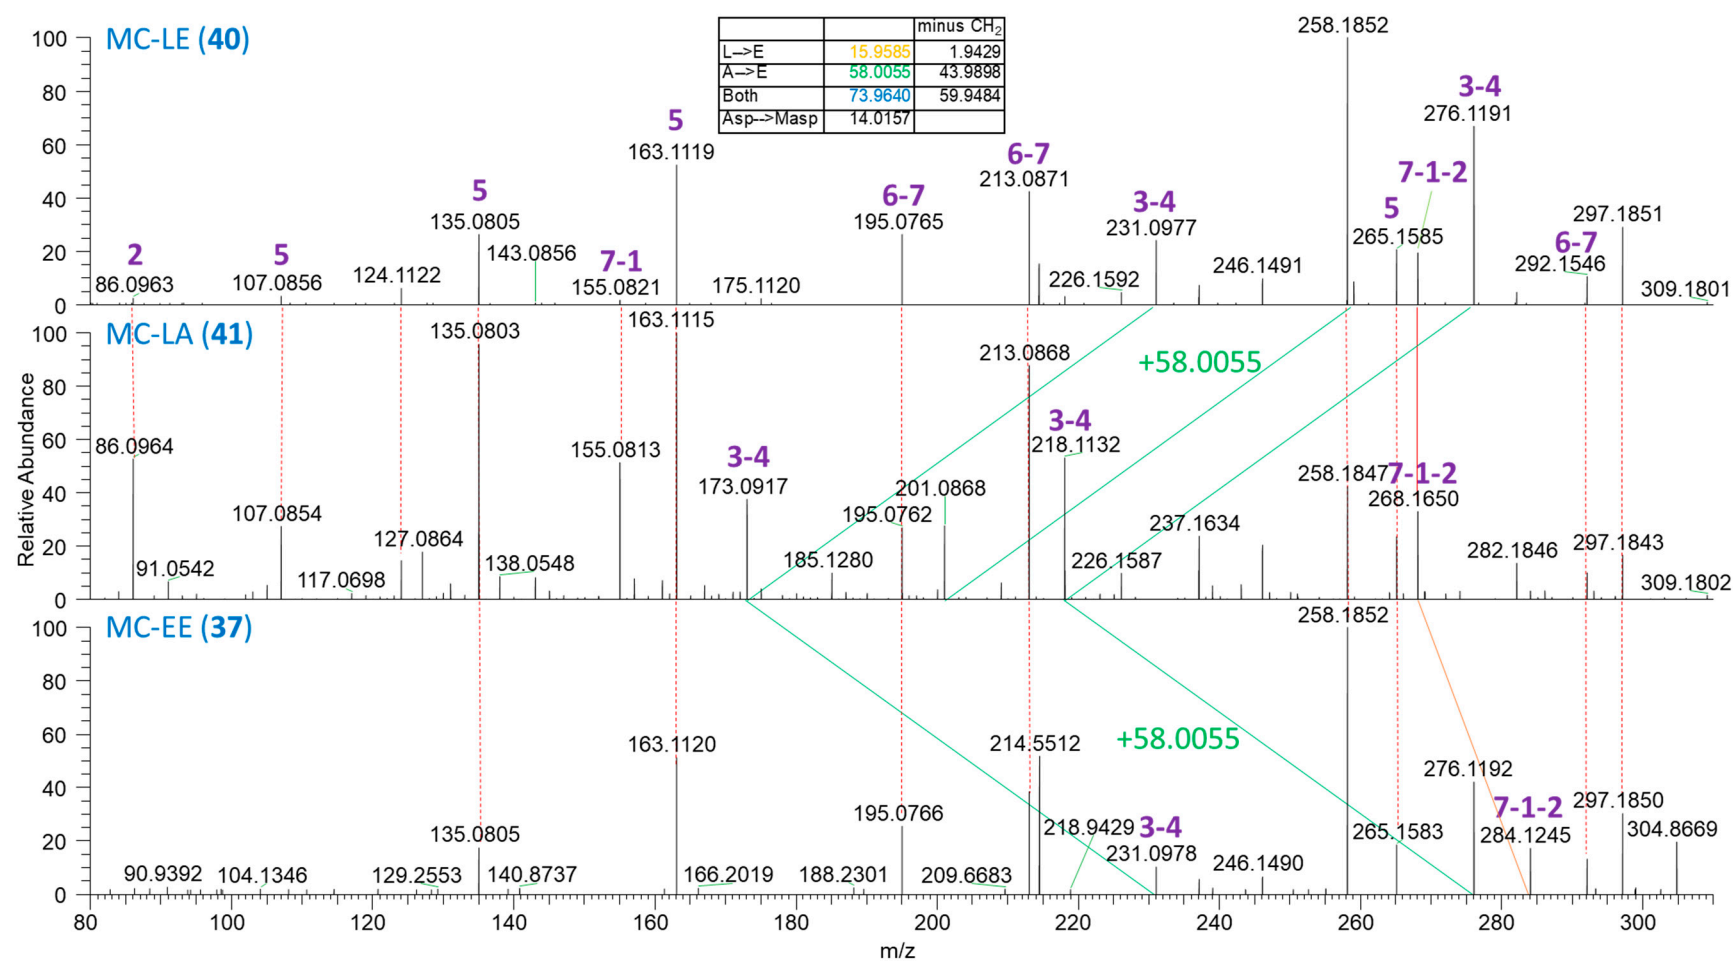

**Figure S29.** Expansion of LC-HRMS/MS spectra of [M+H]<sup>+</sup> of MC-LE (40), MC-LA (41), and MC-EE (37).

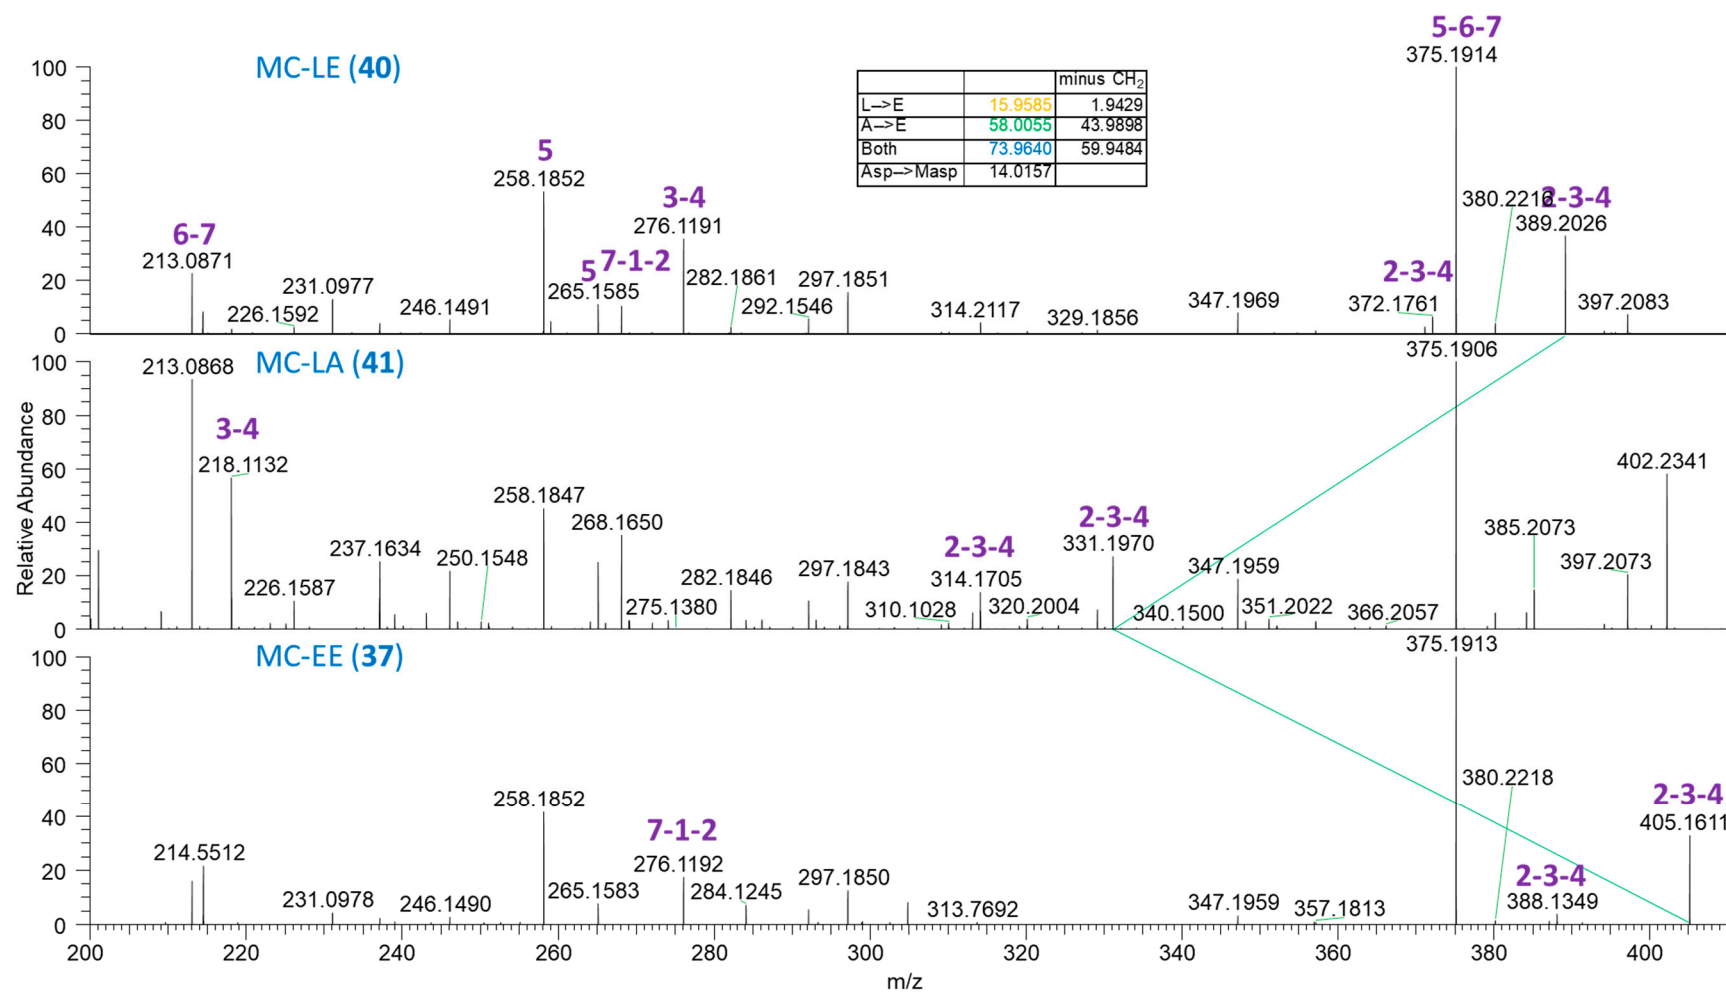

**Figure S30.** Expansion of LC-HRMS/MS spectra of [M+H]<sup>+</sup> of MC-LE (40), MC-LA (41), and MC-EE (37).

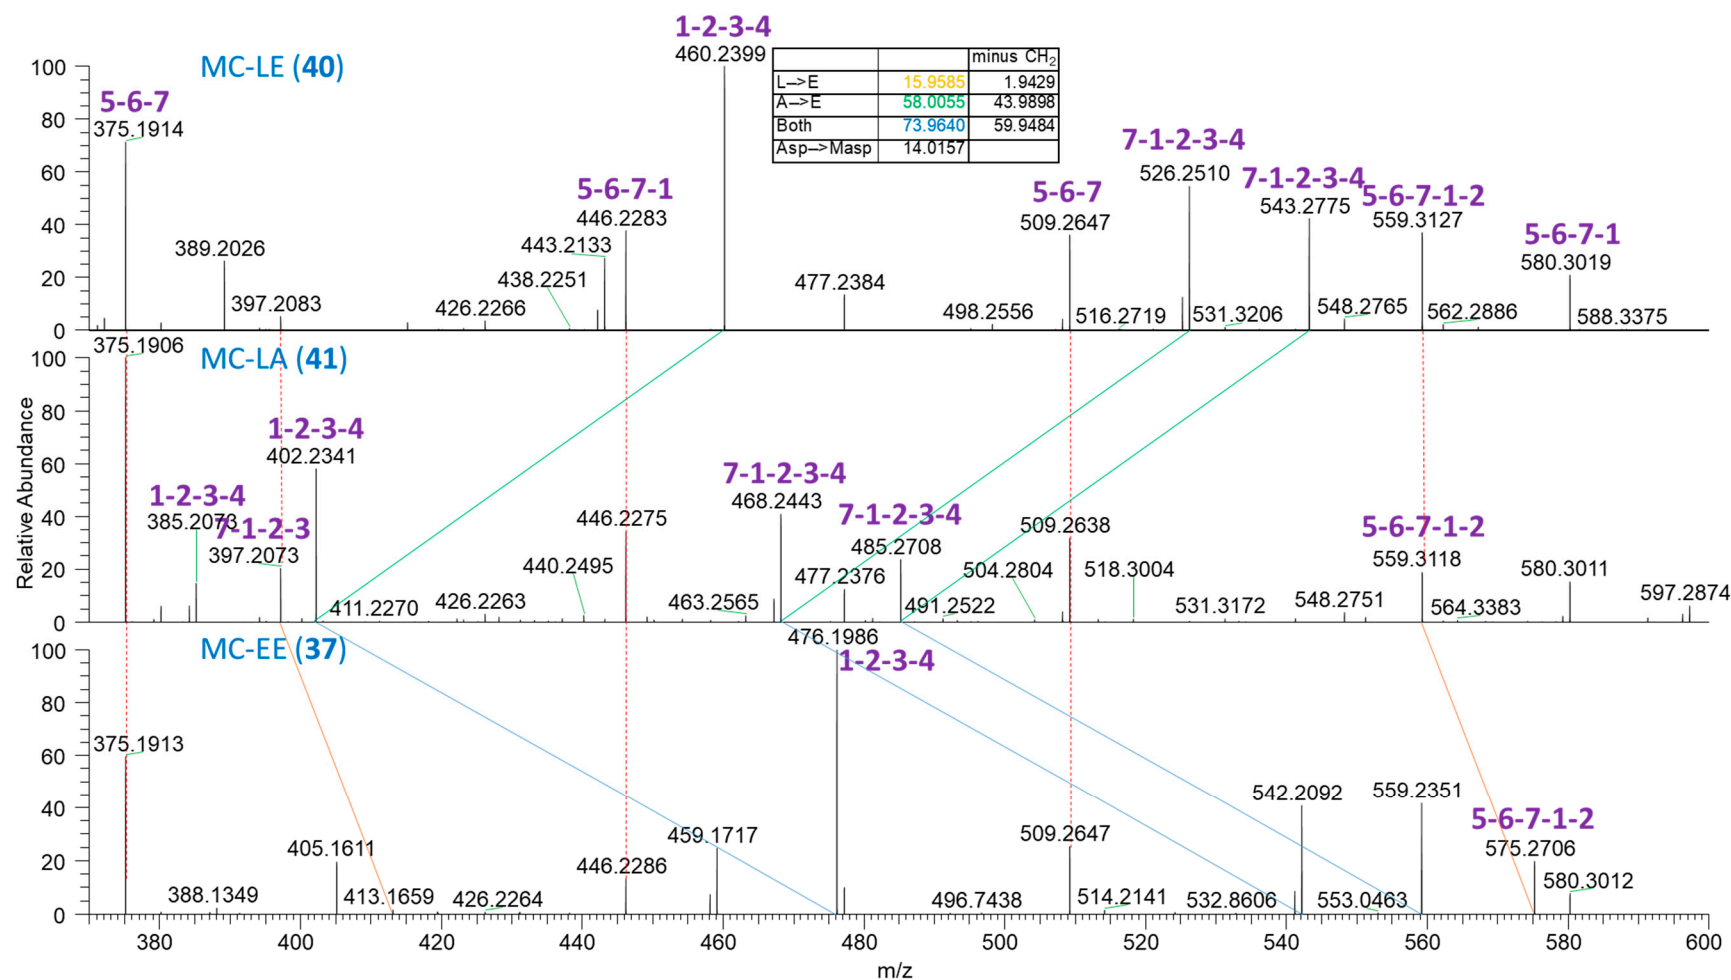

**Figure S31.** Expansion of LC-HRMS/MS spectra of [M+H]<sup>+</sup> of MC-LE (40), MC-LA (41), and MC-EE (37).

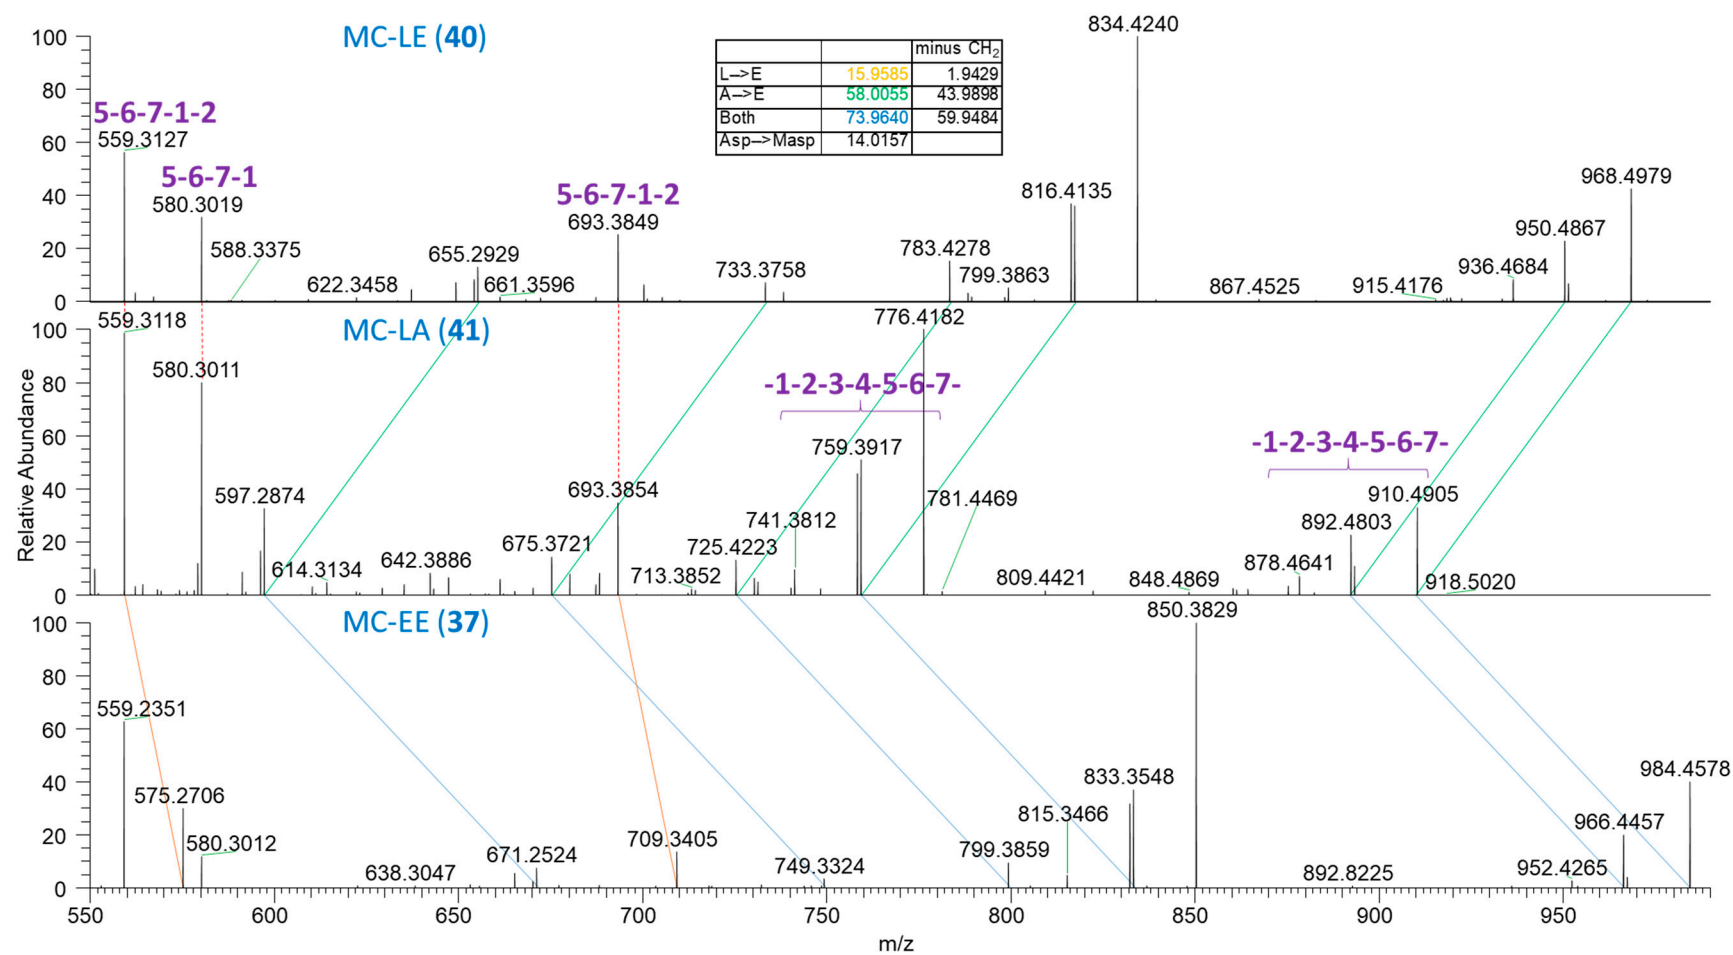

**Figure S32.** Expansion of LC-HRMS/MS spectra of  $[M+H]^+$  of MC-LE (40), MC-LA (41), and MC-EE (37).

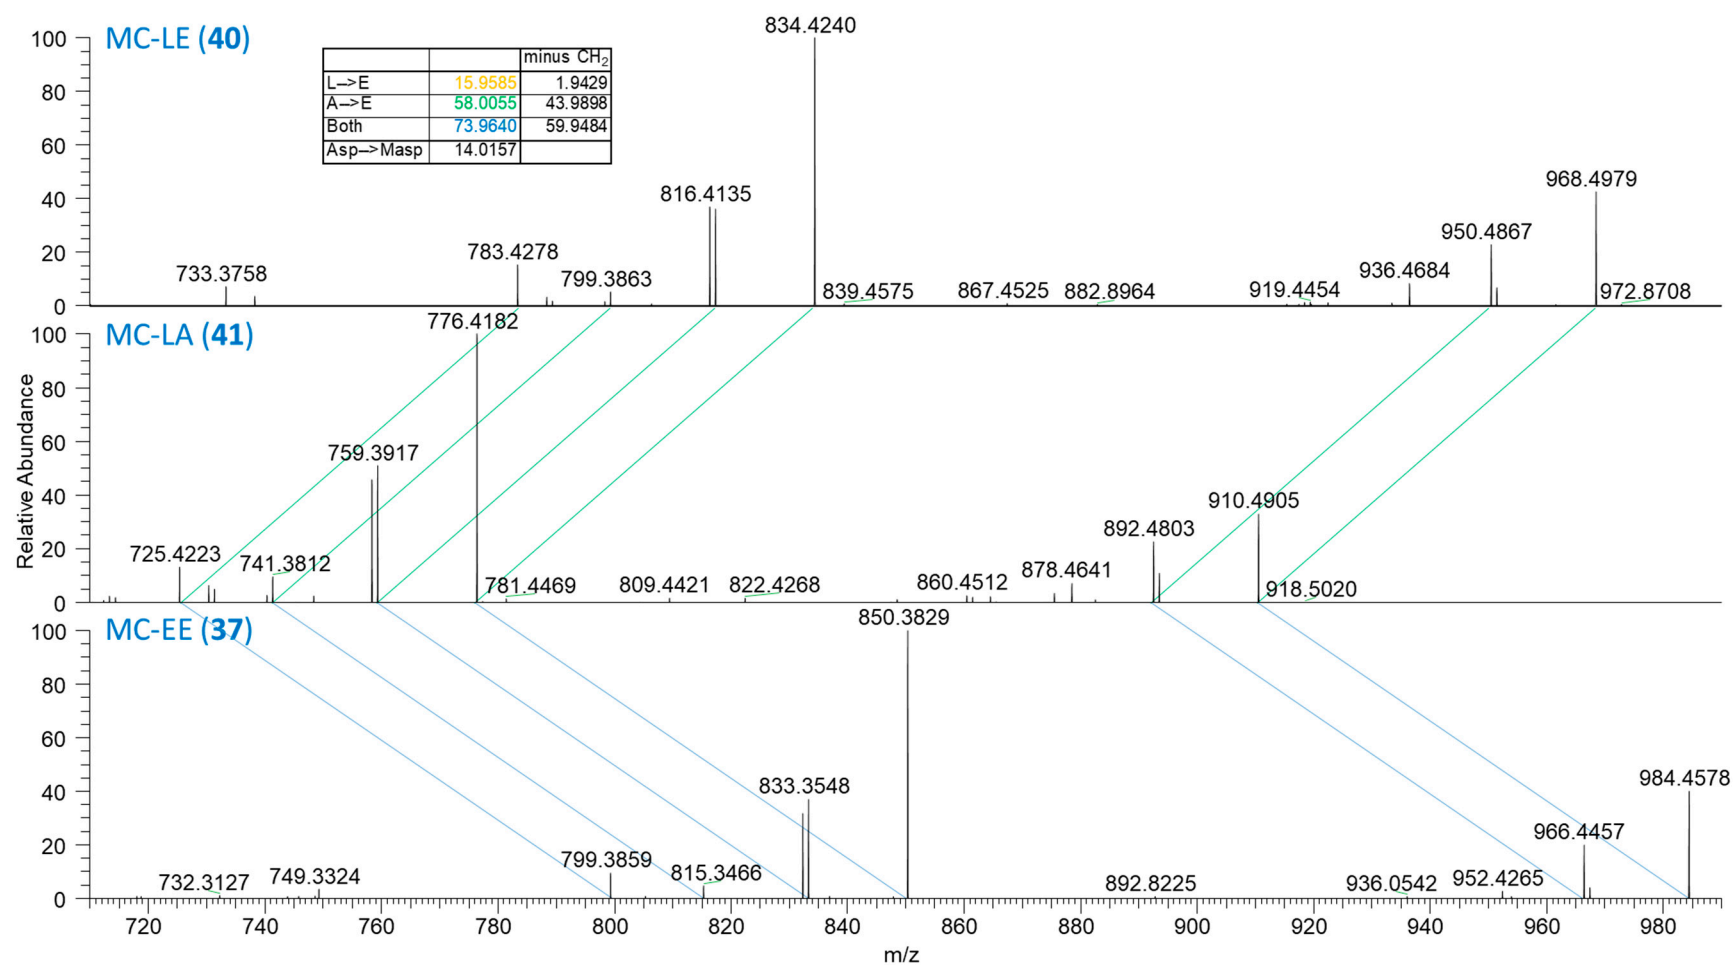

**Figure S33.** Expansion of LC–HRMS/MS spectra of  $[M+H]^+$  of MC-LE (40), MC-LA (41), and MC-EE (37).

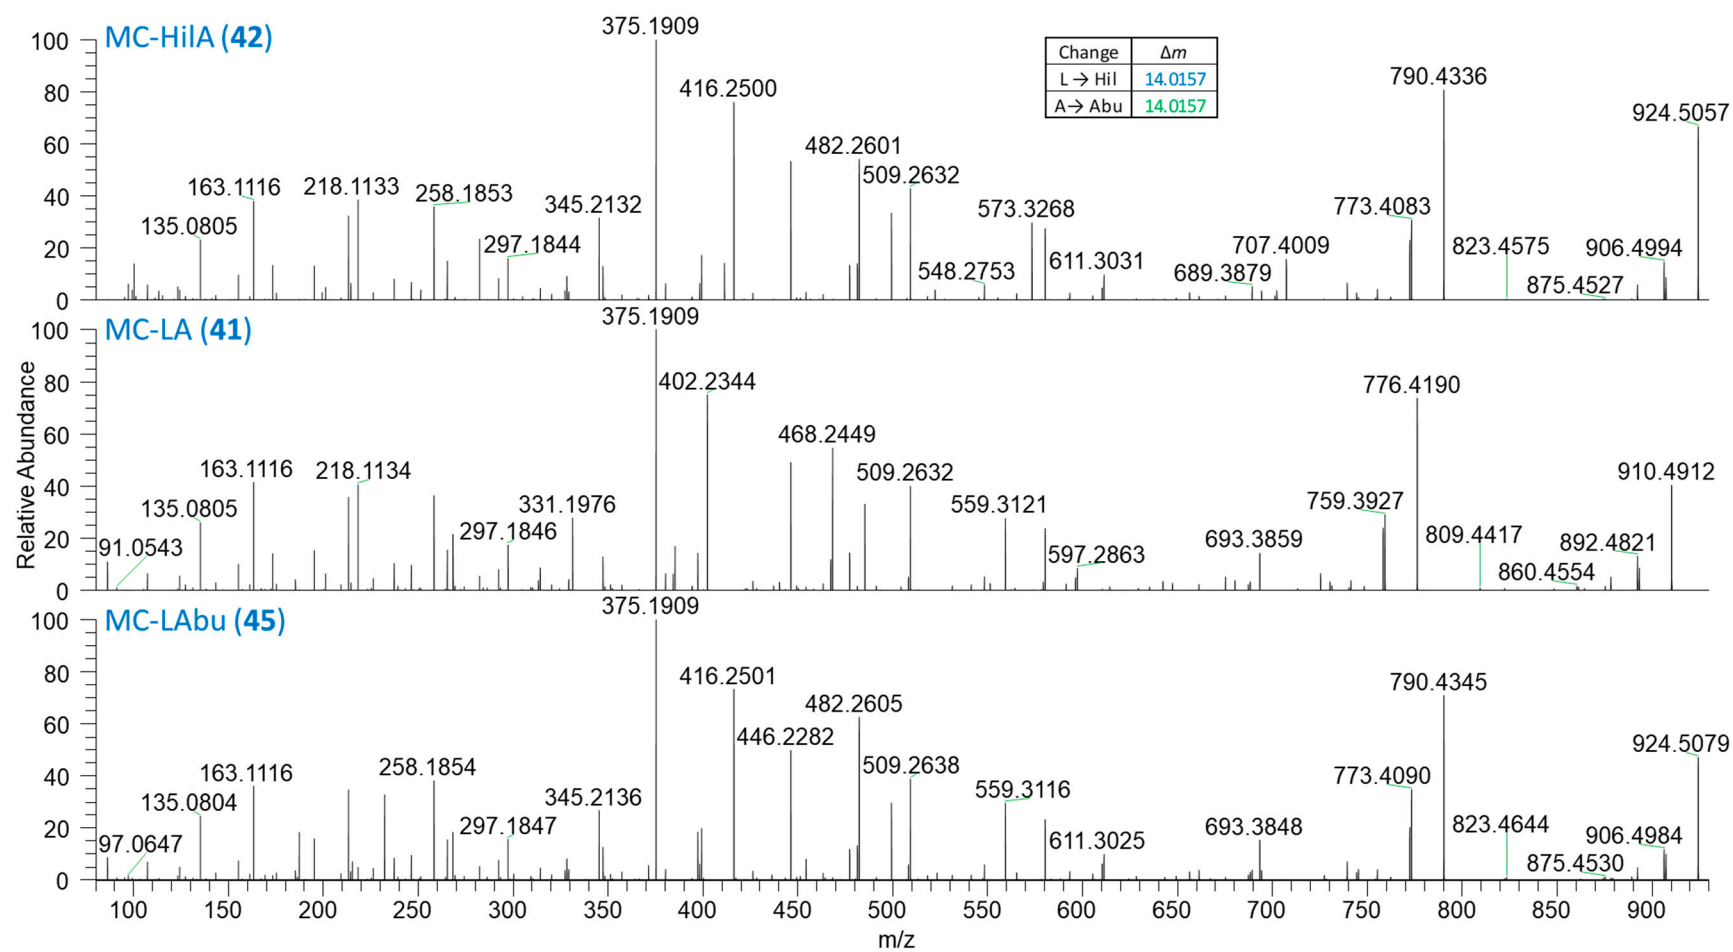

Figure S34. LC-HRMS/MS spectra of  $[M+H]^+$  of MC-HiLA (42), MC-LA (41), and MC-LABu (45).



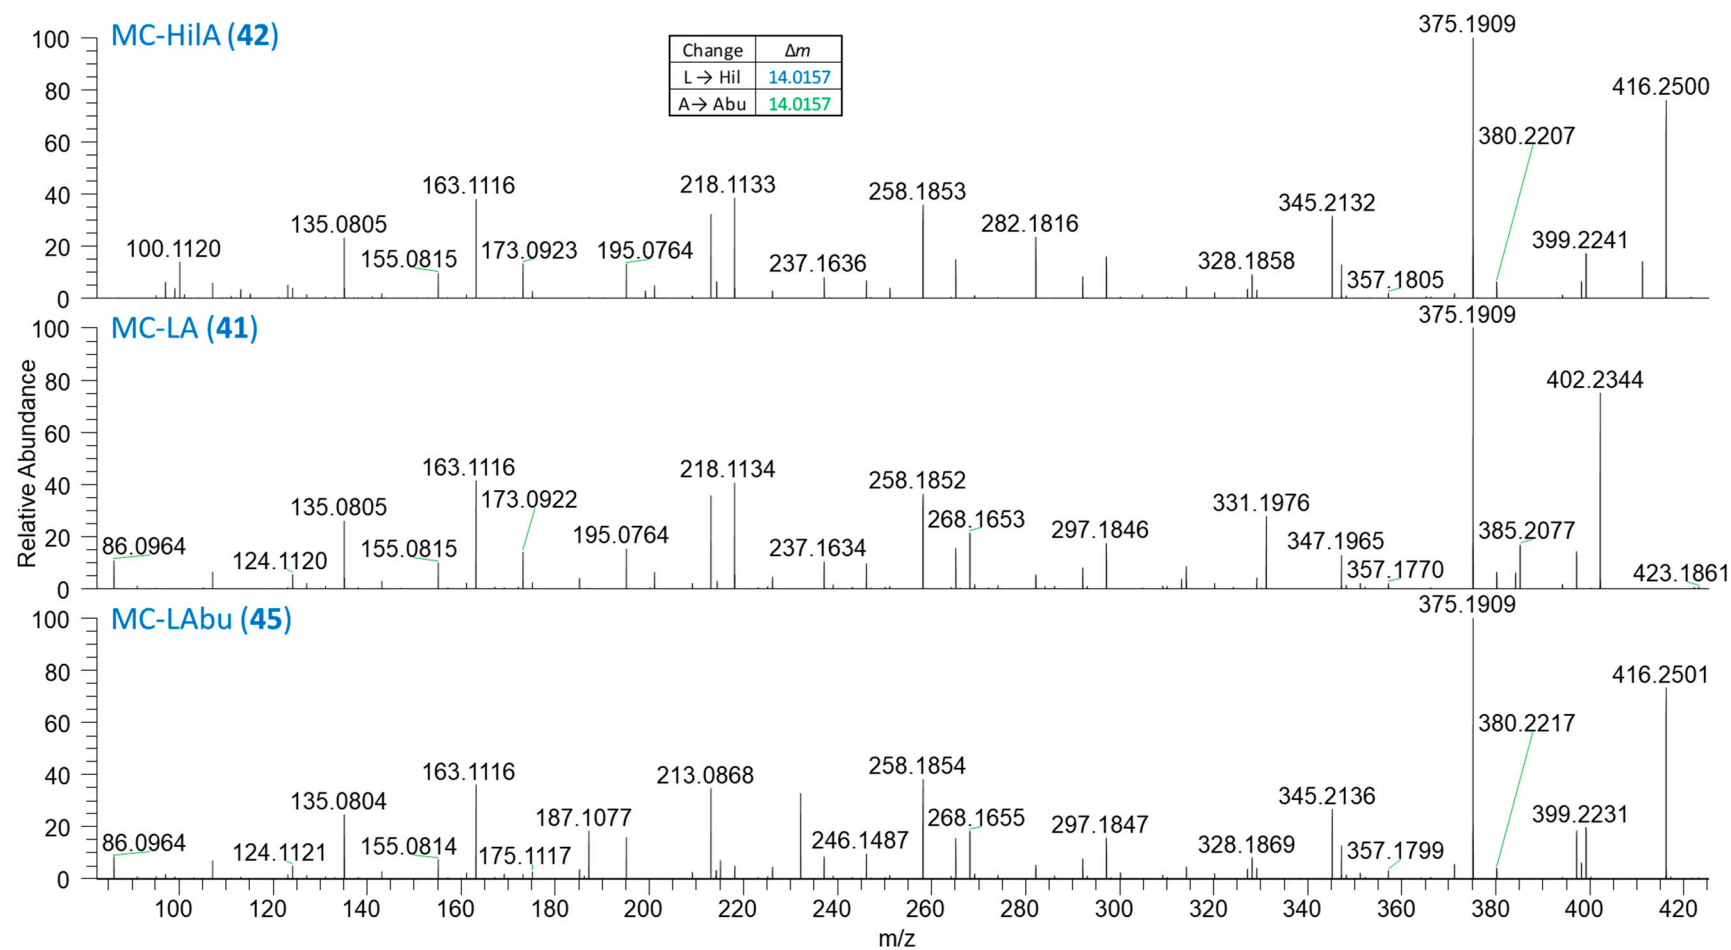

Figure S35. Expansion of LC-HRMS/MS spectra of  $[M+H]^+$  of MC-HiLA (42), MC-LA (41), and MC-LAbu (45).



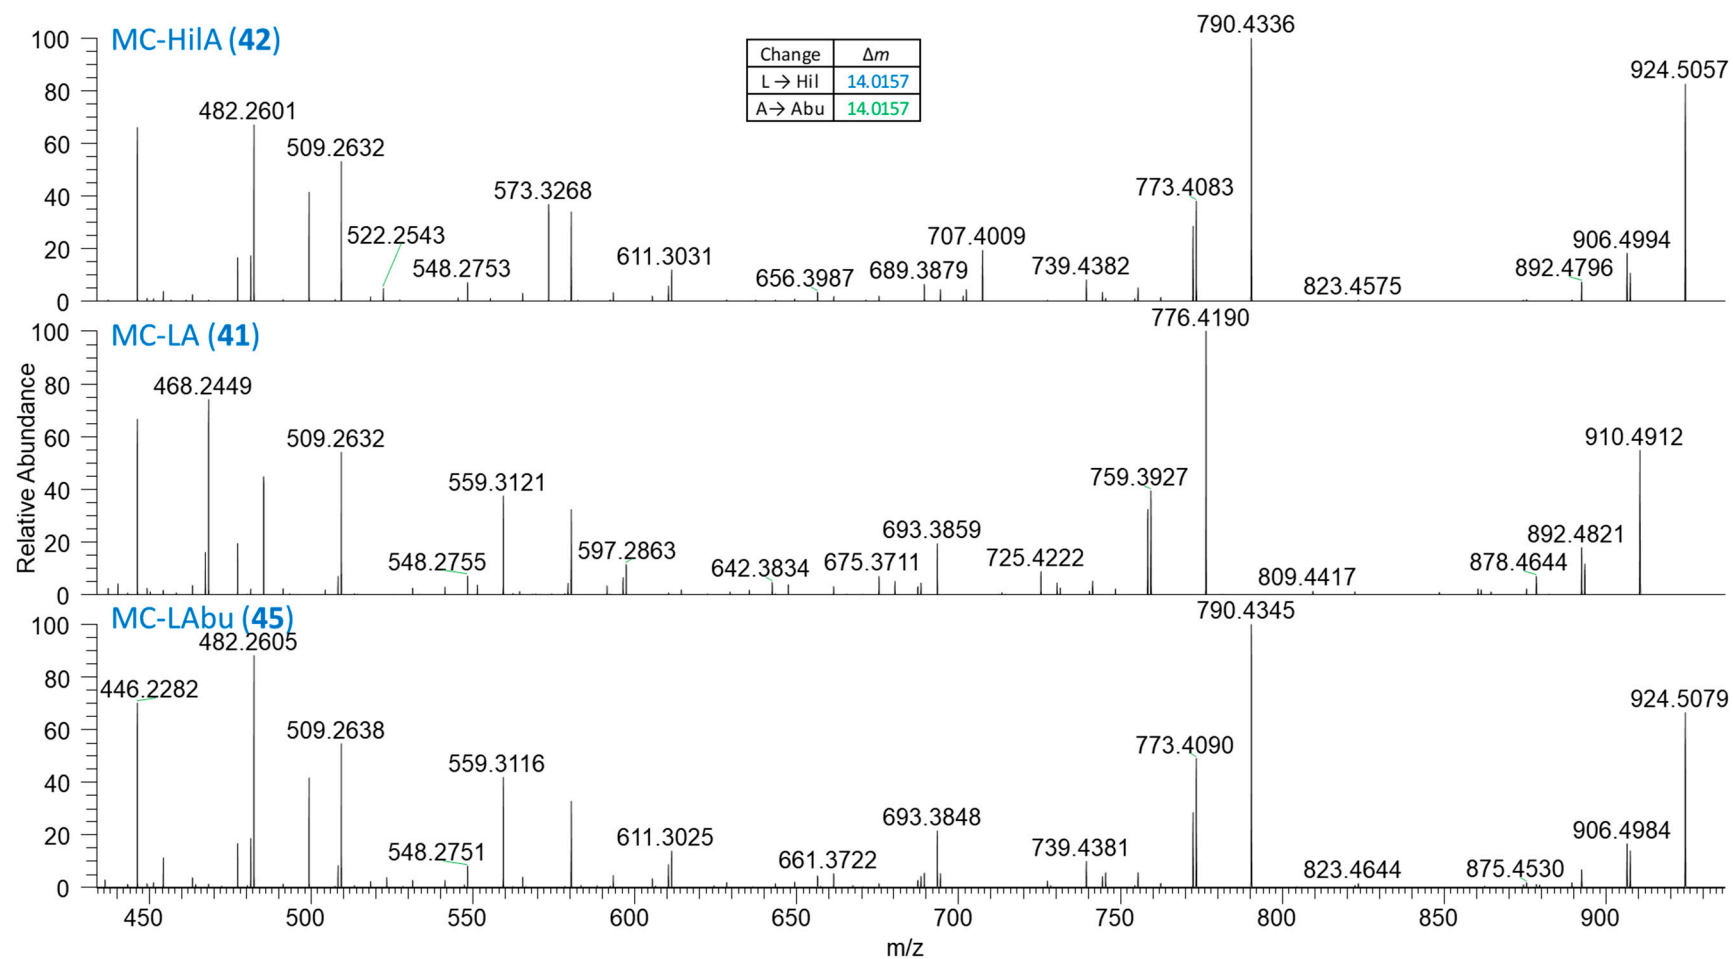

**Figure S36.** Expansion of LC-HRMS/MS spectra of  $[M+H]^+$  of MC-HiLA (42), MC-LA (41), and MC-LAbu (45).

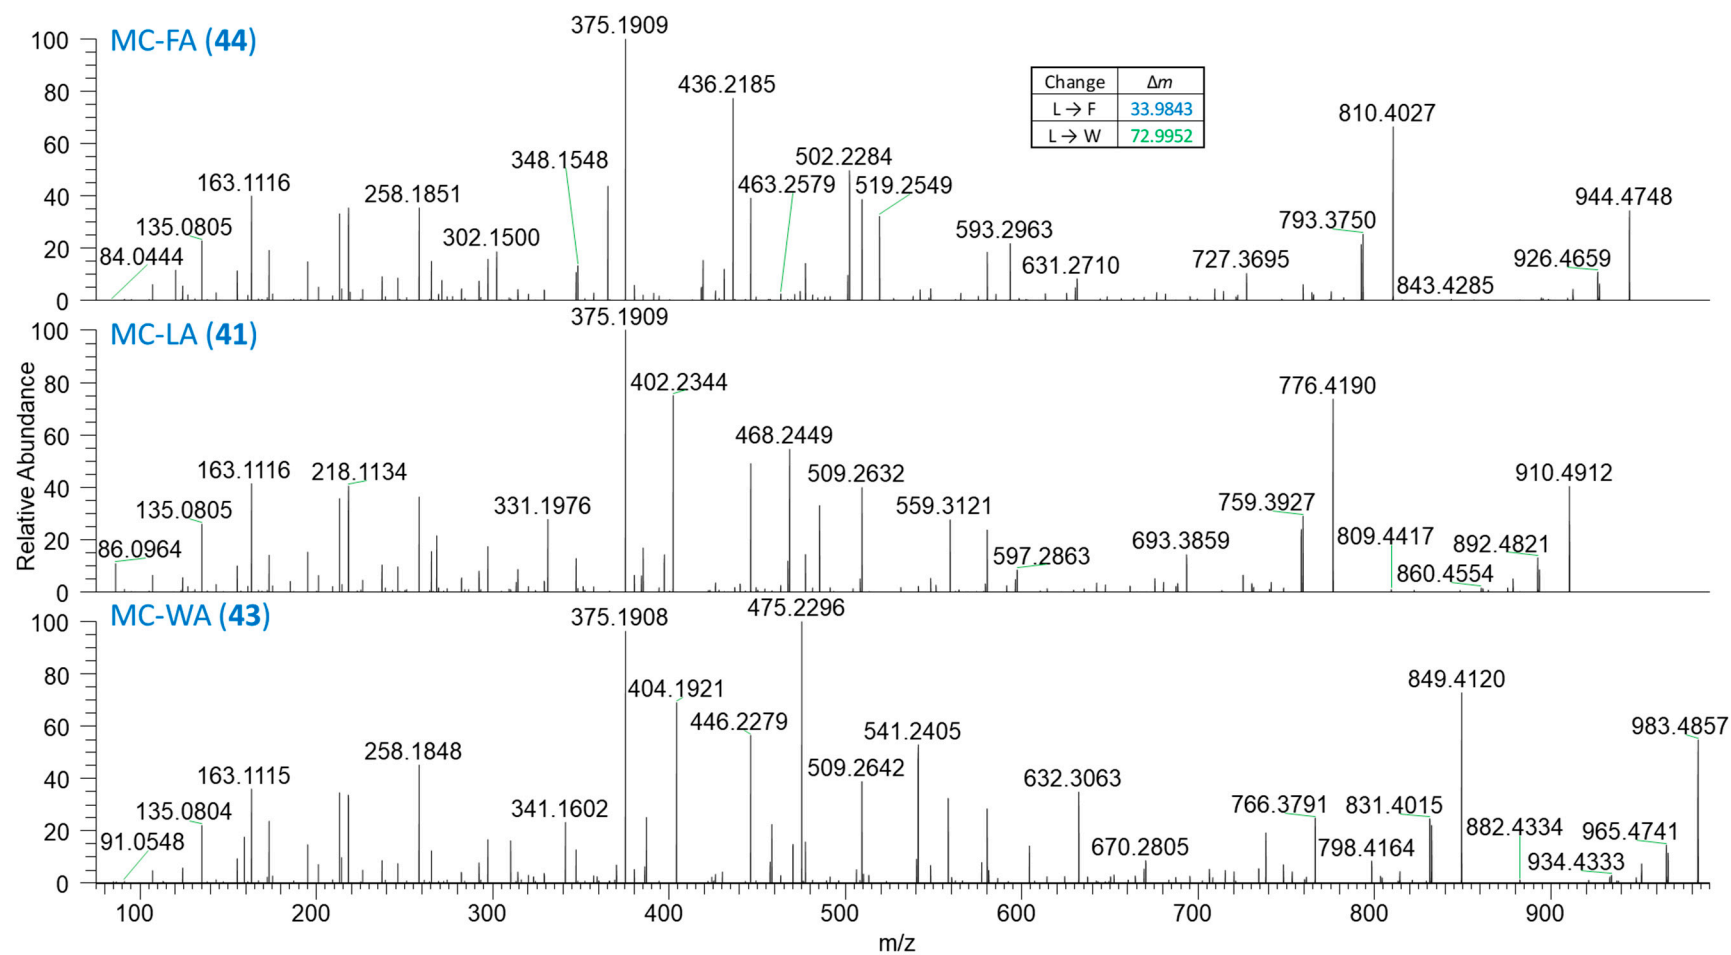

**Figure S37.** LC-HRMS/MS spectra of  $[M+H]^+$  of MC-FA (44), MC-LA (41), and MC-WA (43).

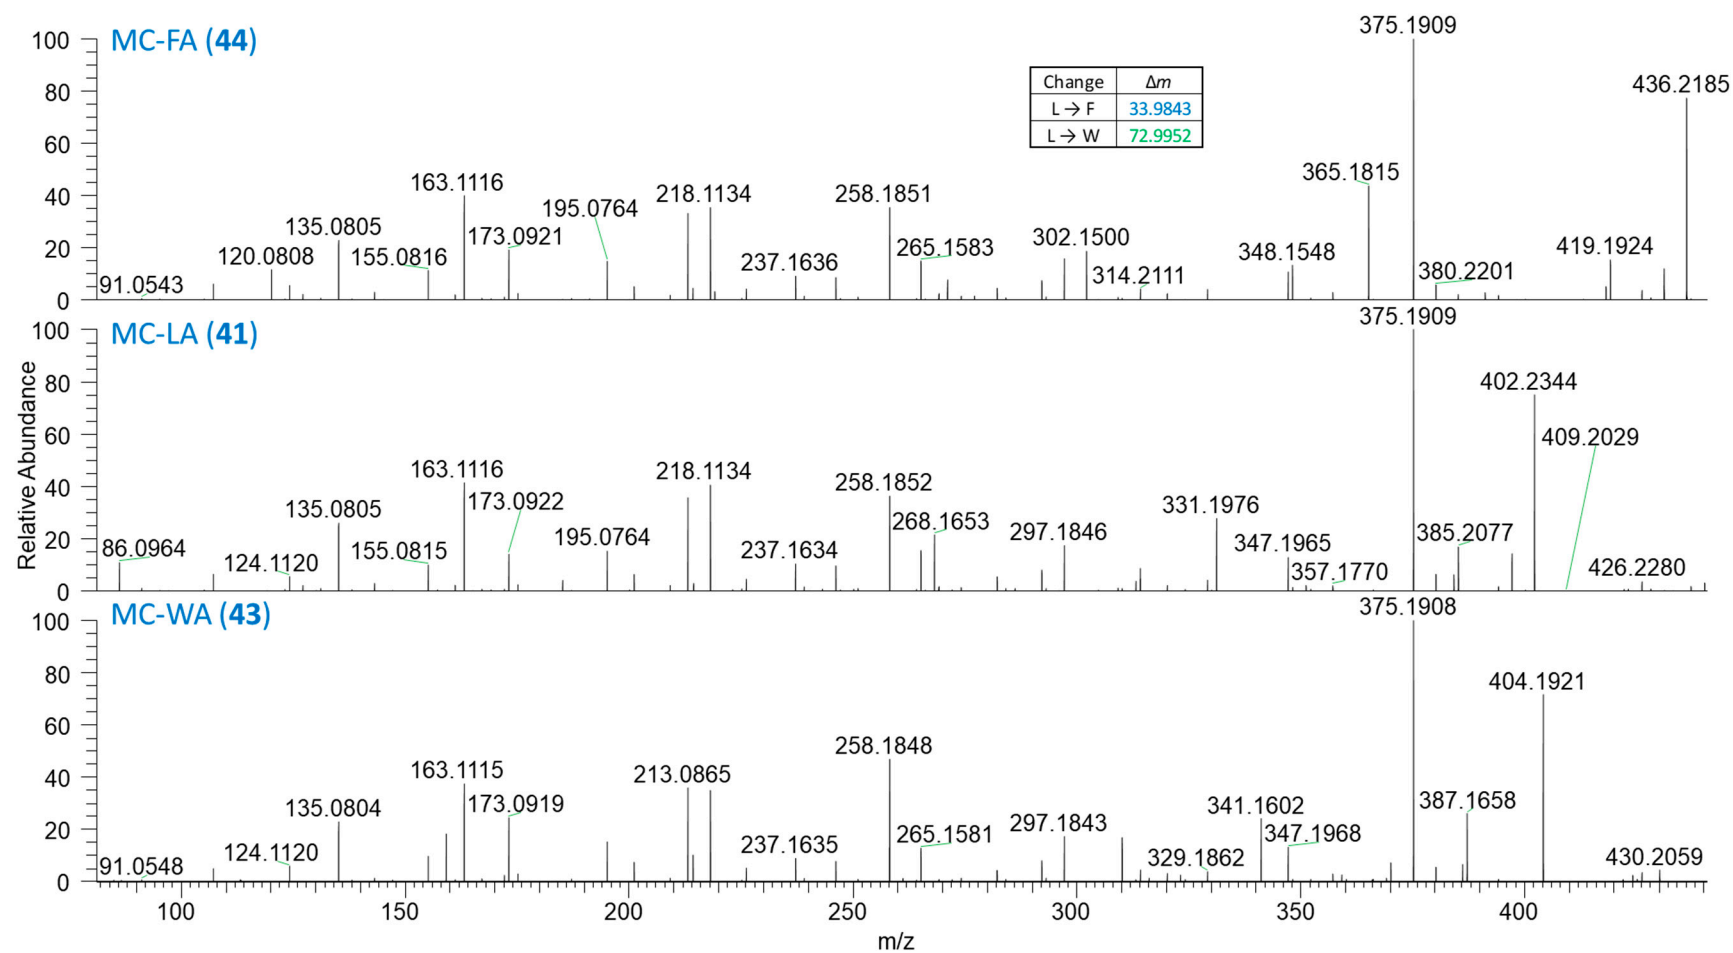

Figure S38. Expansion of LC–HRMS/MS spectra of  $[M+H]^+$  of MC-FA (44), MC-LA (41), and MC-WA (43).

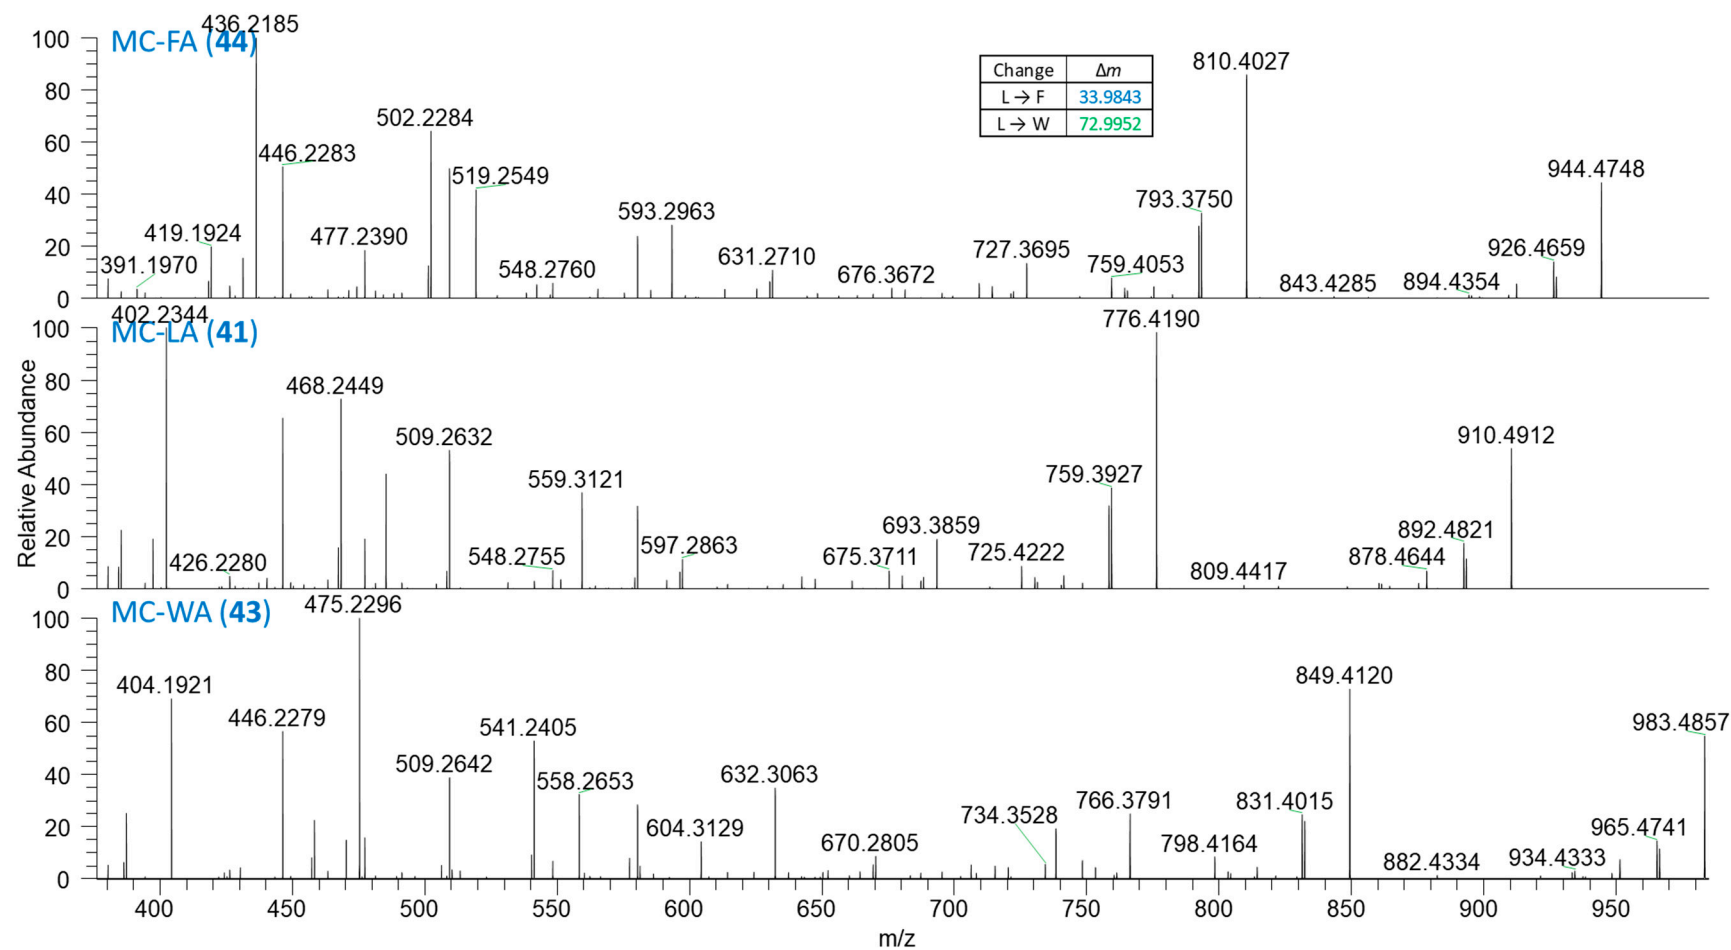

**Figure S39.** Expansion of LC–HRMS/MS spectra of  $[M+H]^+$  of MC-FA (44), MC-LA (41), and MC-WA (43).

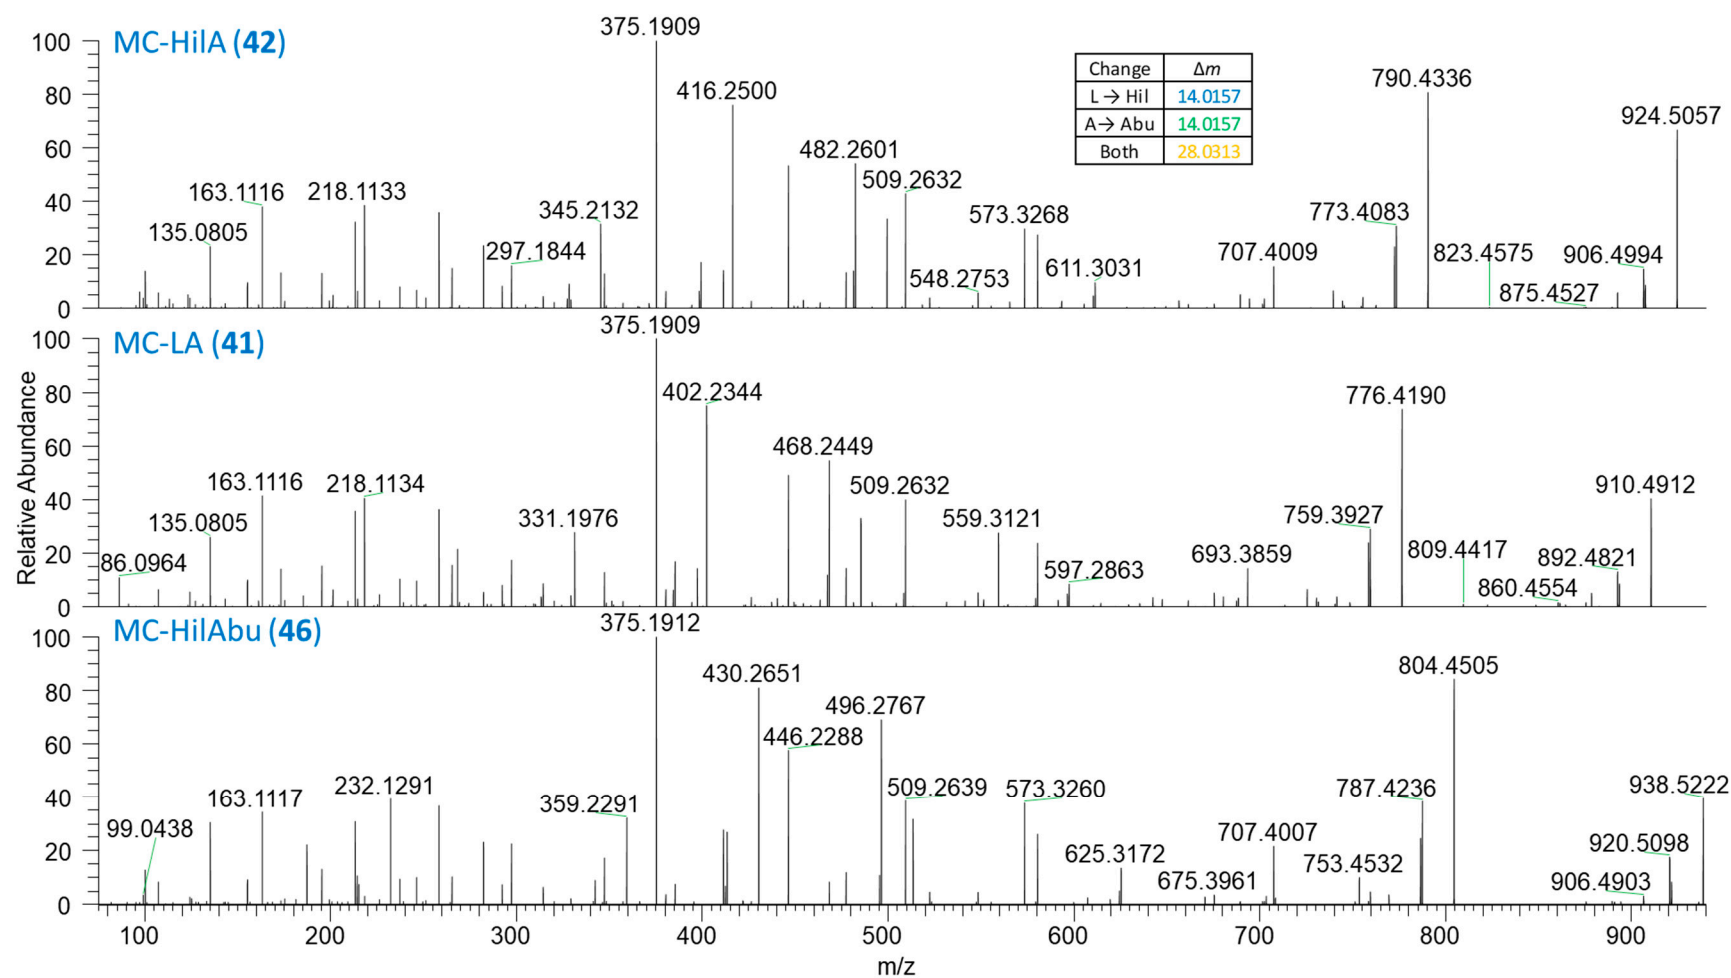

Figure S40. LC-HRMS/MS spectra of  $[M+H]^+$  of MC-HilA (42), MC-LA (41), and MC-HilAbu (46).

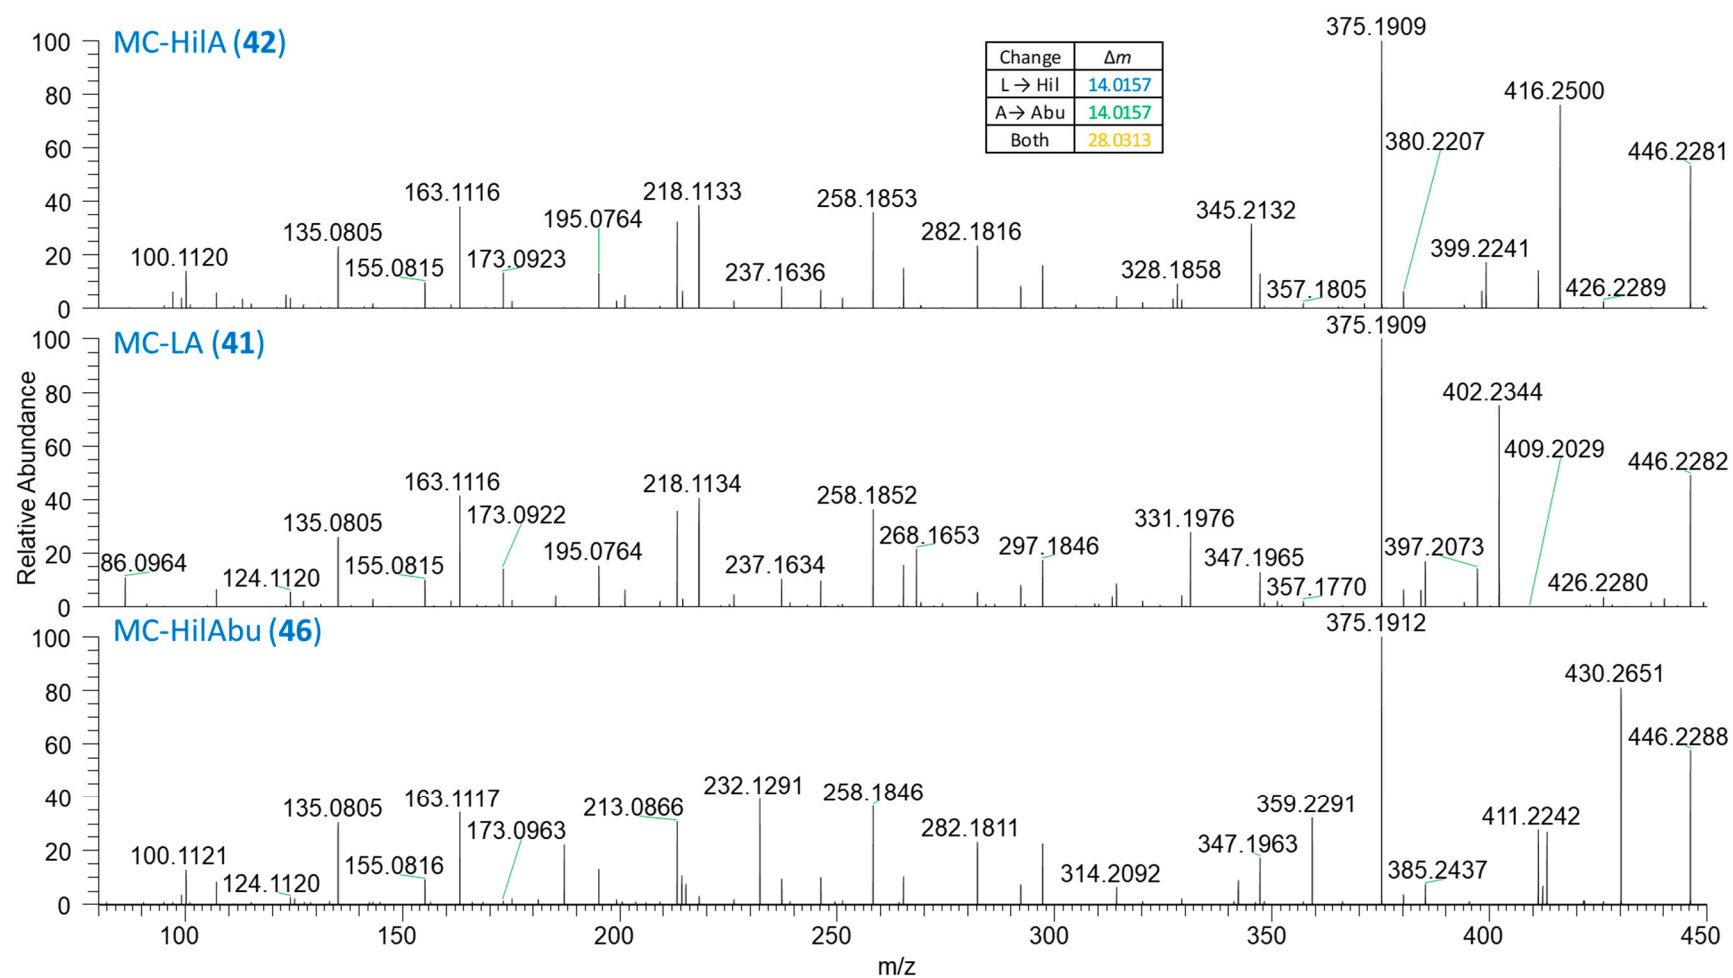

**Figure S41.** Expansion of LC–HRMS/MS spectra of  $[M+H]^+$  of MC-HiLA (42), MC-LA (41), and MC-HiABu (46).

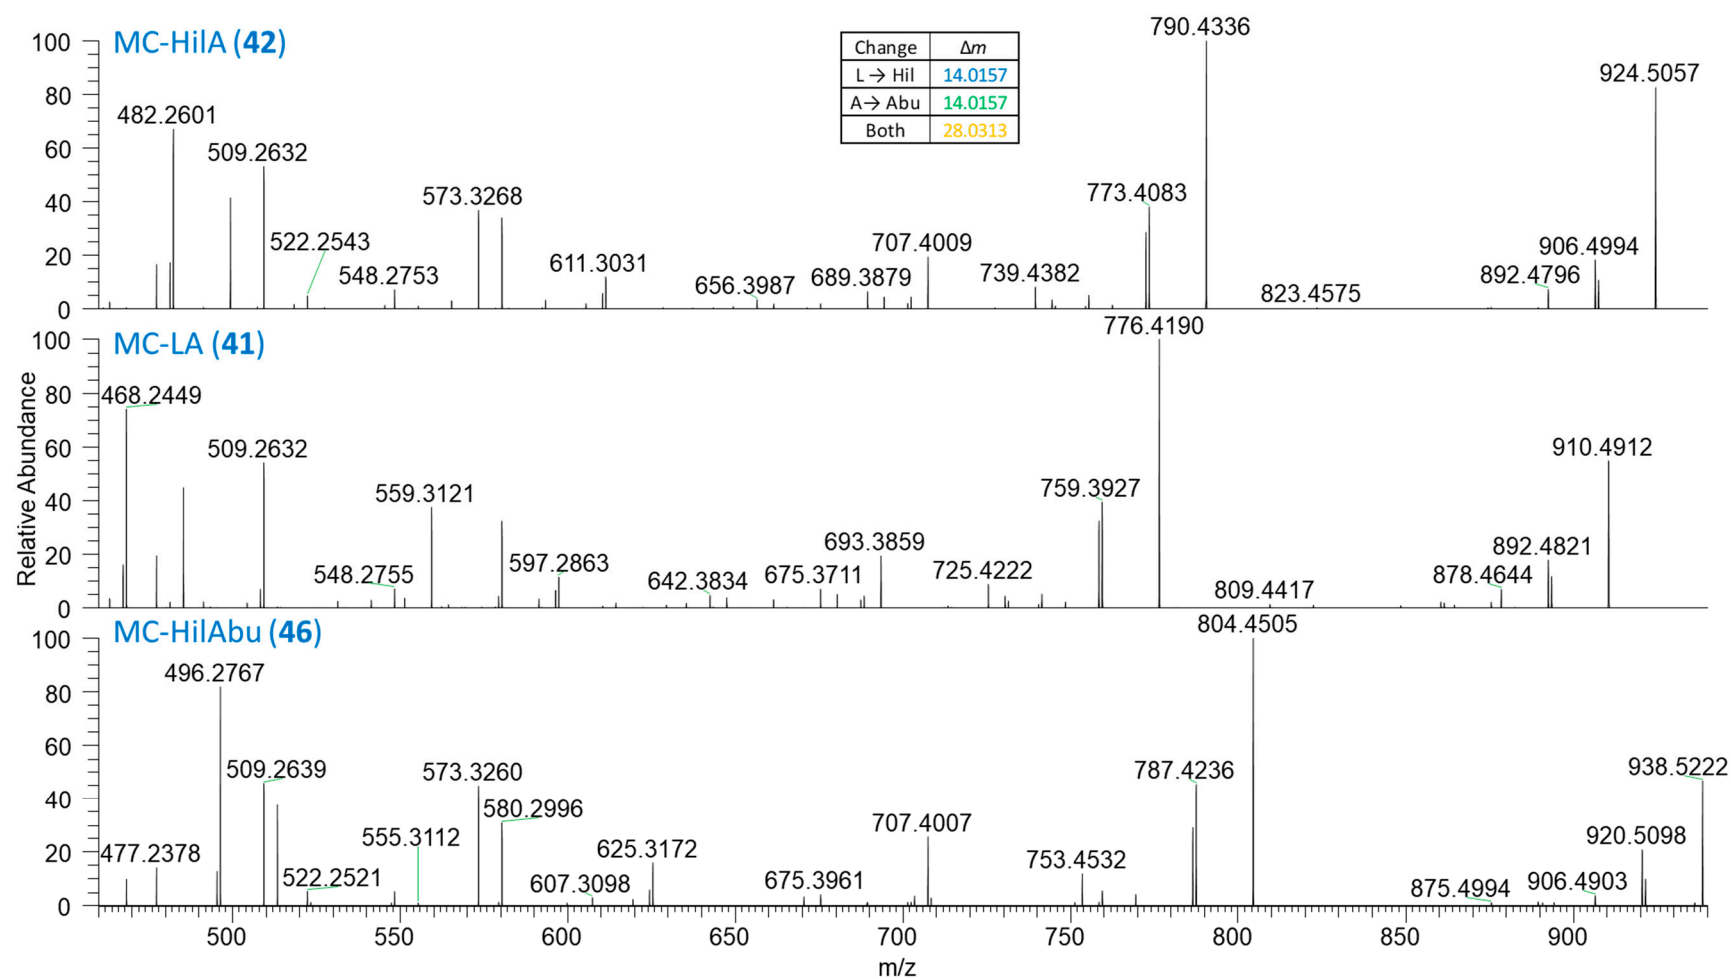

**Figure S42.** Expansion of LC–HRMS/MS spectra of  $[M+H]^+$  of MC-HilA (42), MC-LA (41), and MC-HilAbu (46).

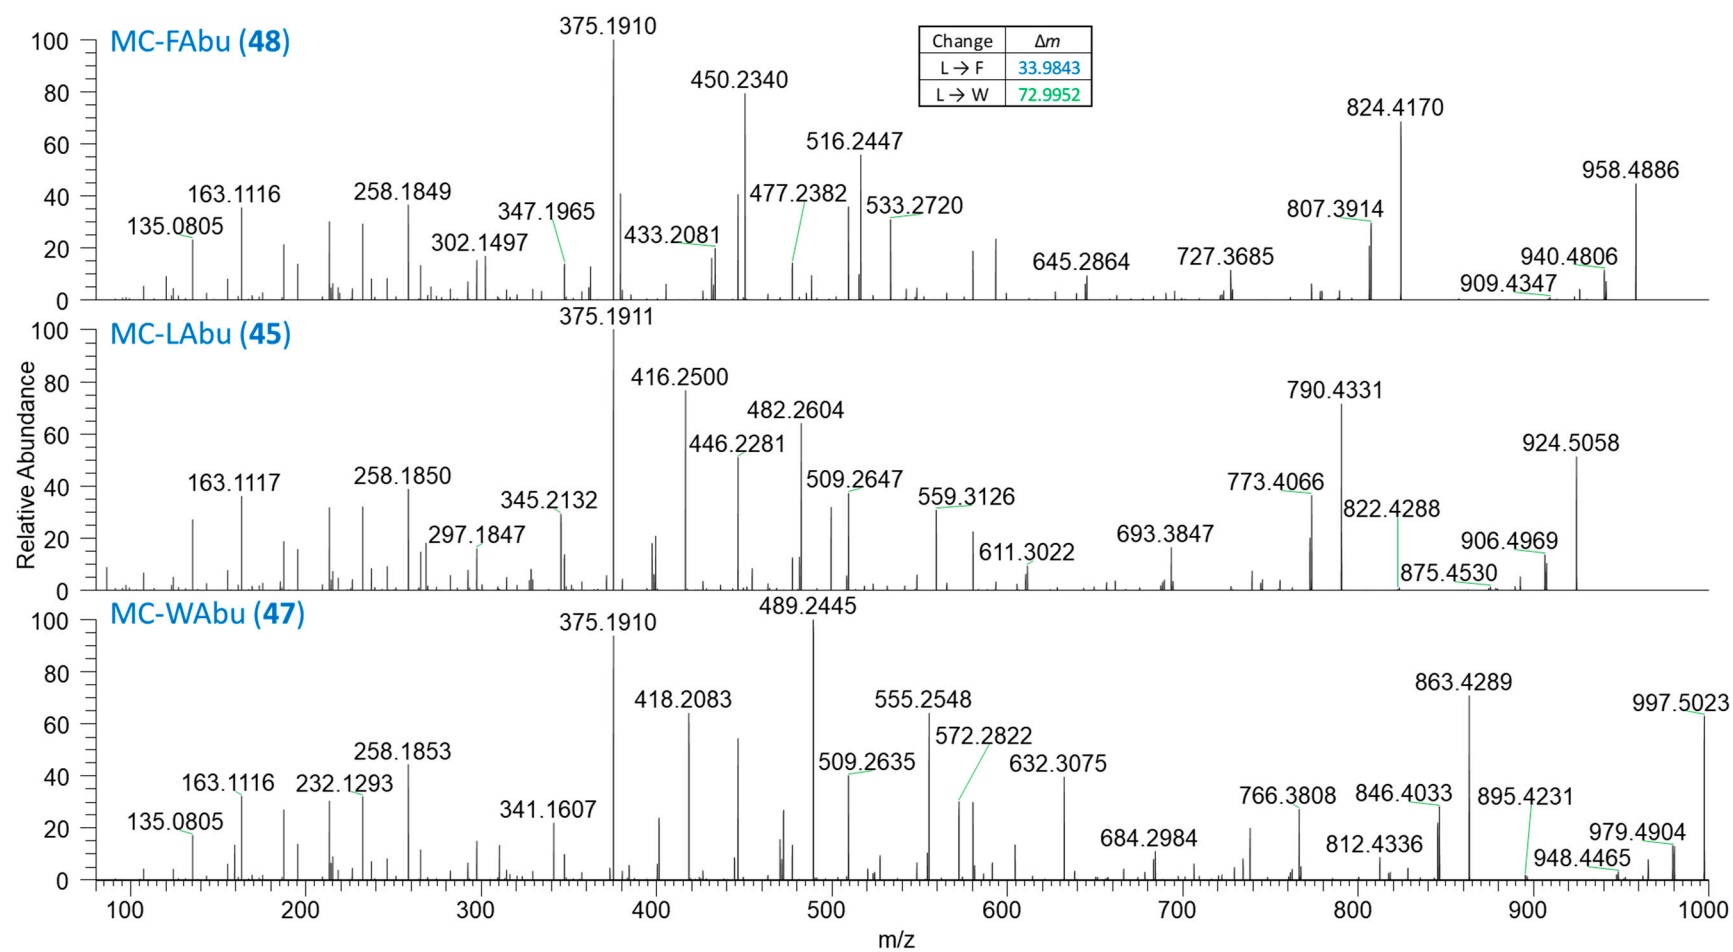

**Figure S43.** LC-HRMS/MS spectra of  $[M+H]^+$  of MC-FAbu (48), MC-LAbu (45), and MC-WAbu (47).



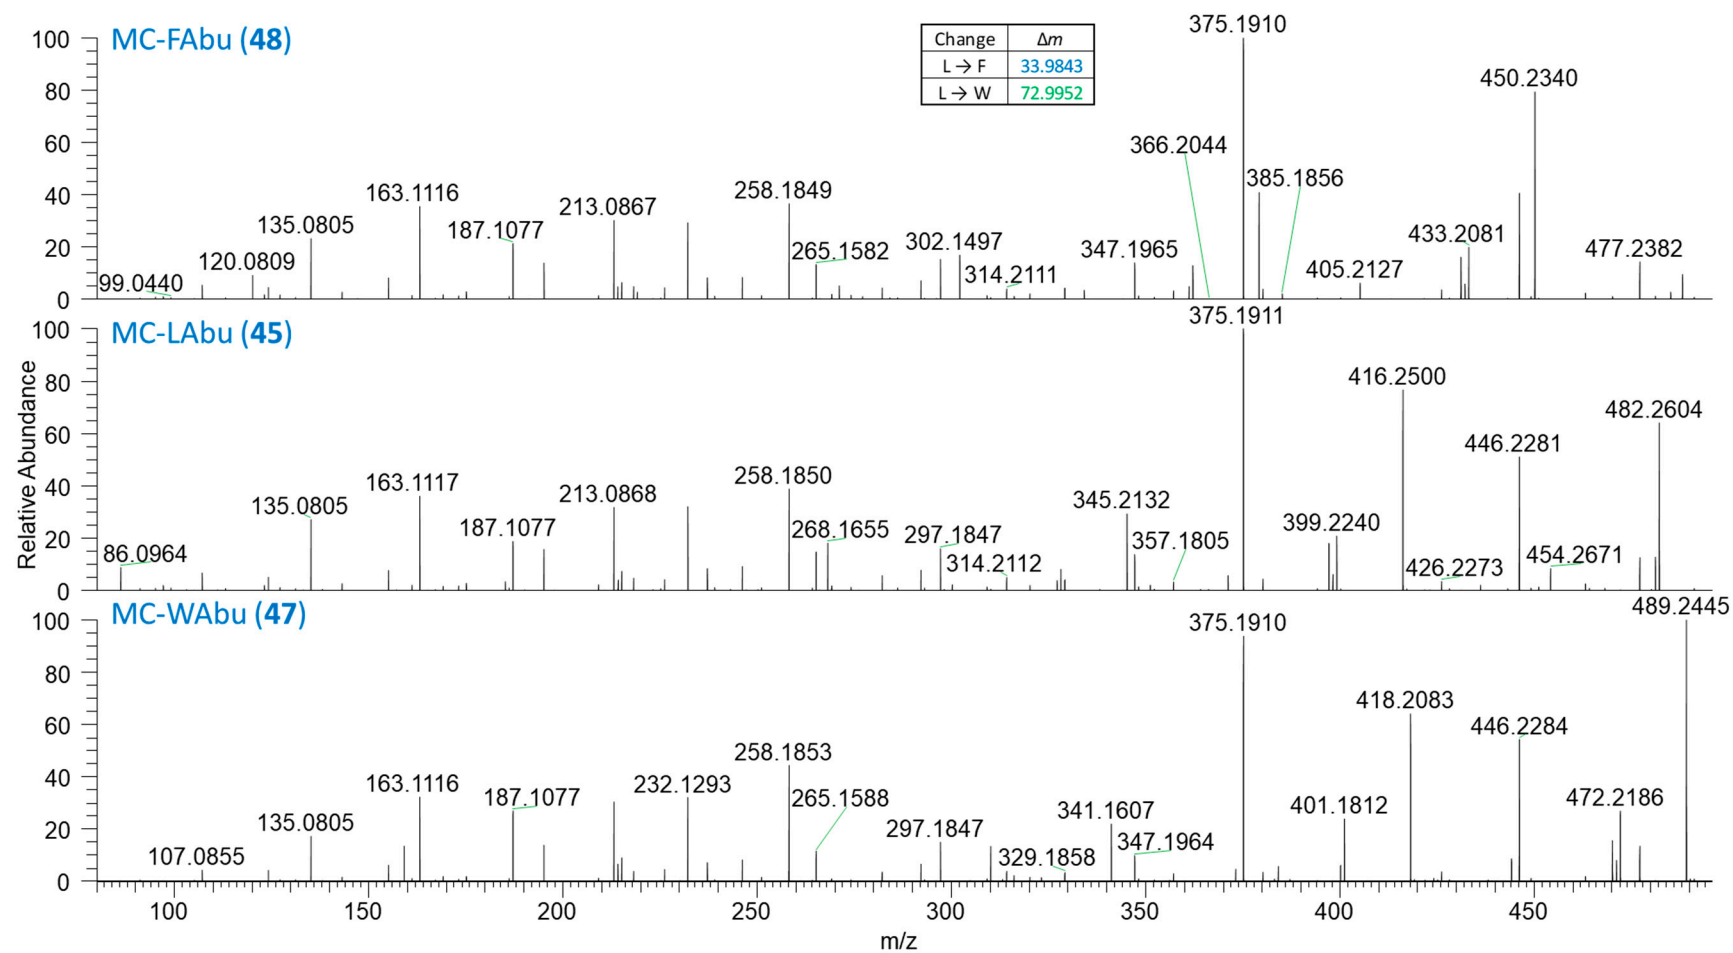

**Figure S44.** Expansion of LC–HRMS/MS spectra of  $[M+H]^+$  of MC-FAbu (48), MC-LAbu (45), and MC-WAbu (47).

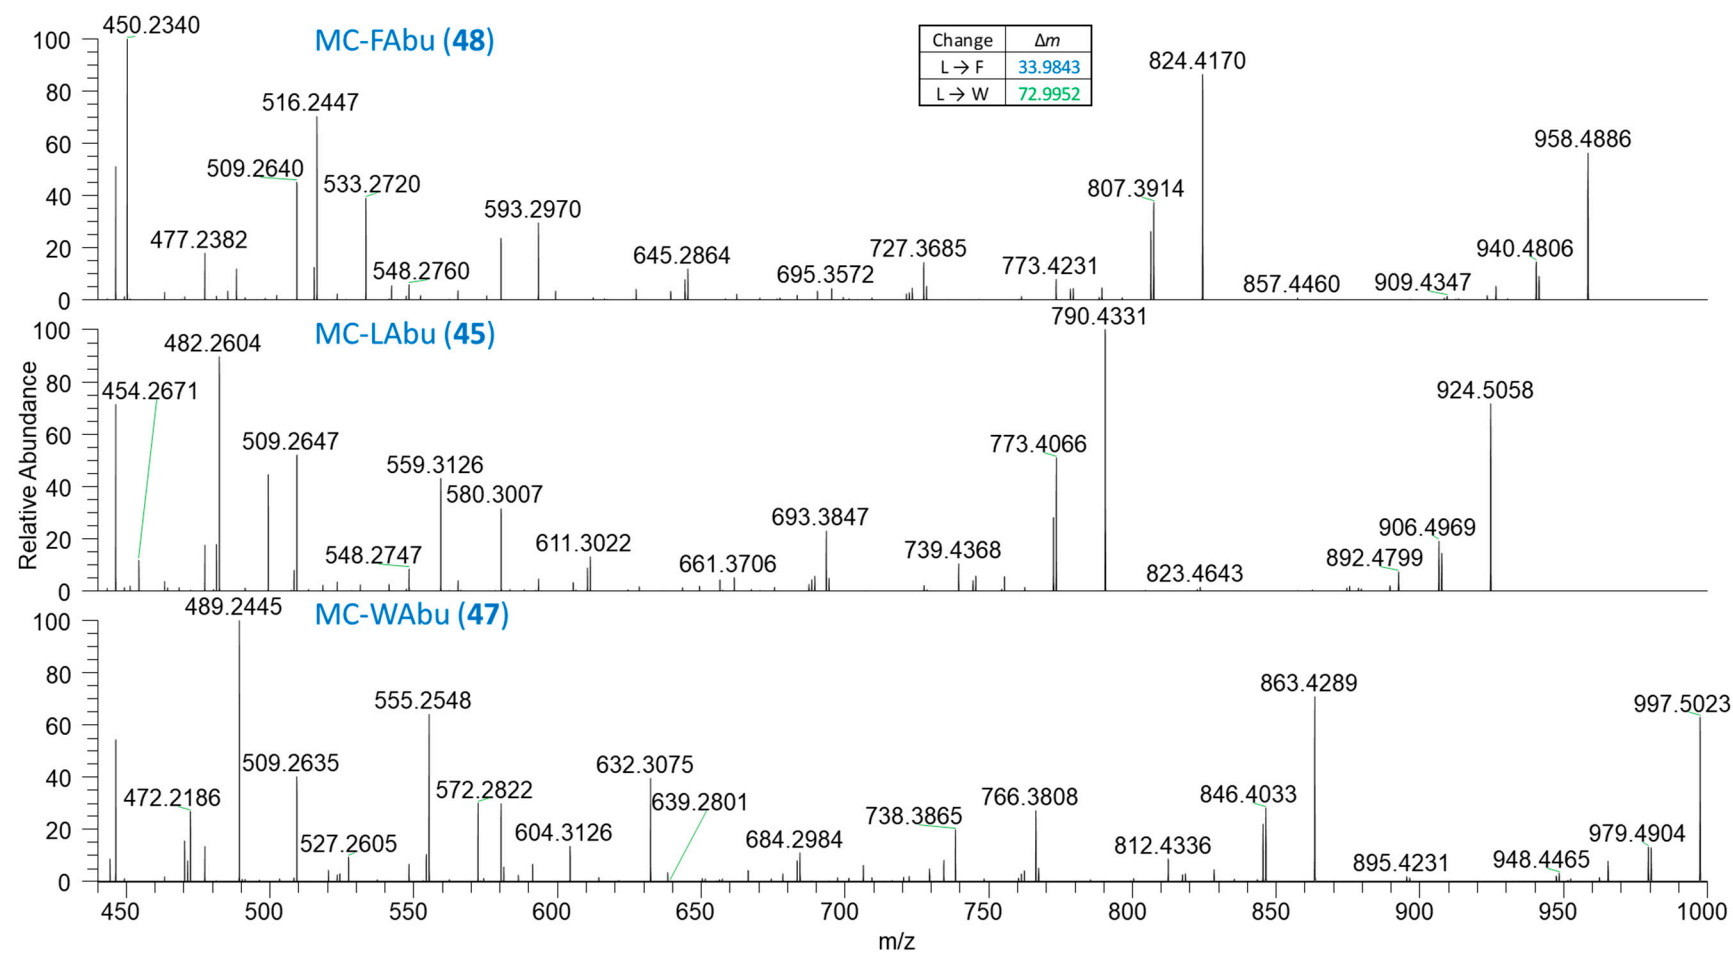

**Figure S45.** Expansion of LC-HRMS/MS spectra of  $[M+H]^+$  of MC-FABu (48), MC-LABu (45), and MC-WABu (47).

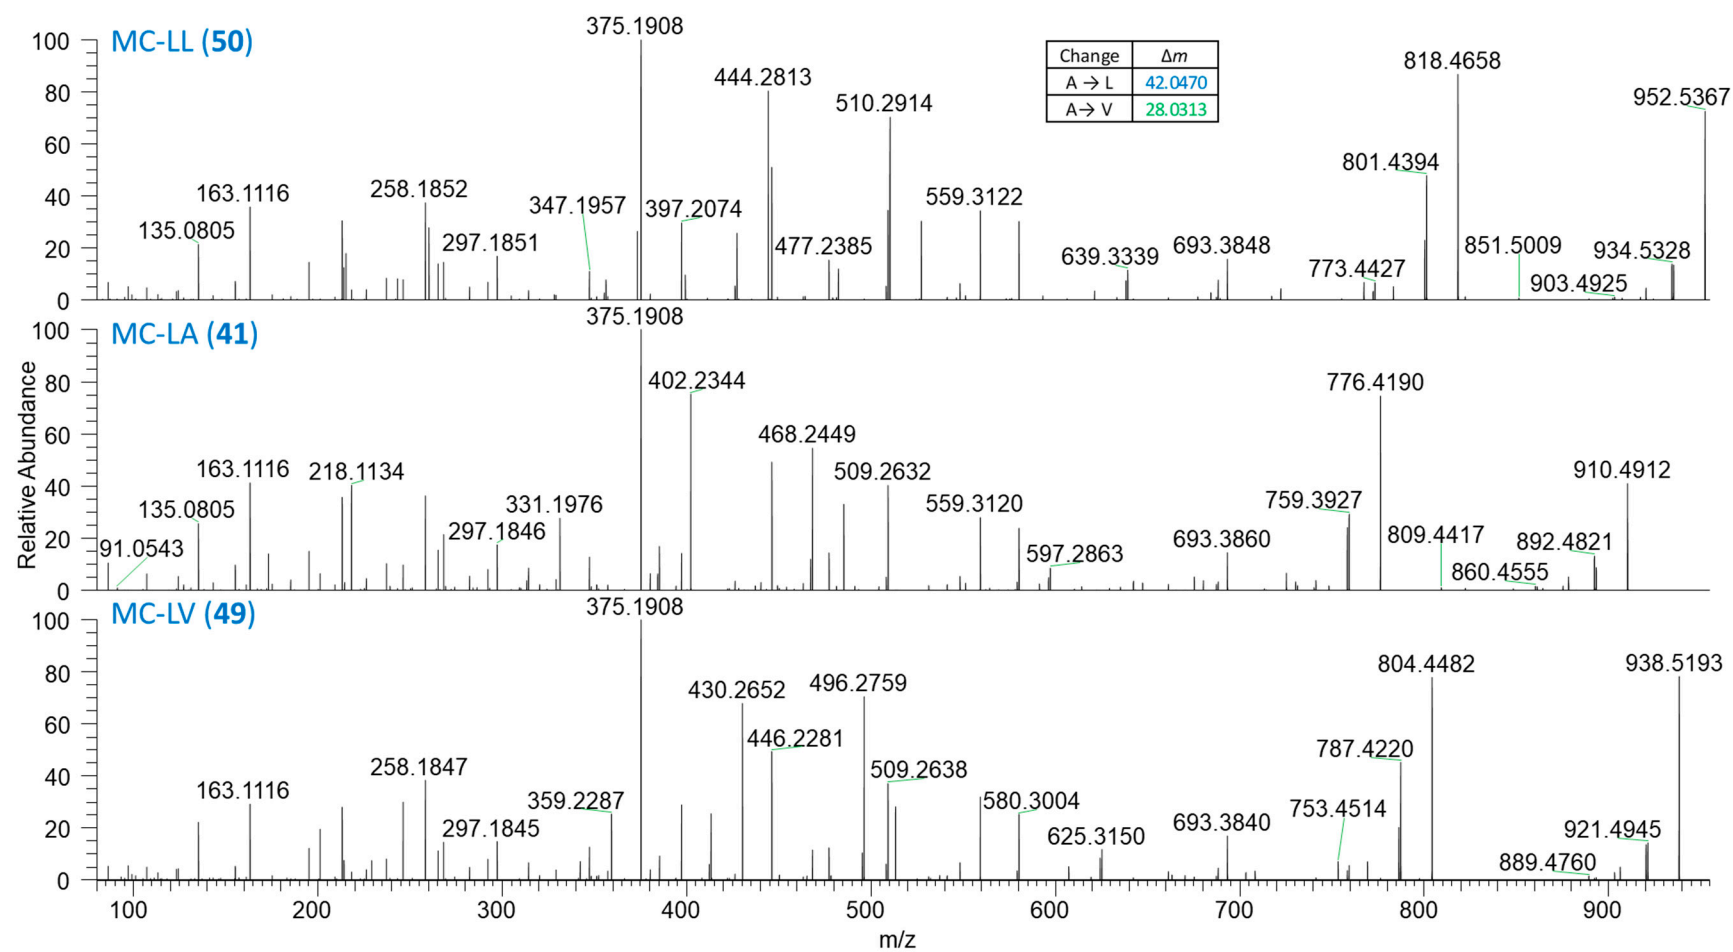

Figure S46. LC-HRMS/MS spectra of  $[M+H]^+$  of MC-LL (50), MC-LA (41), and MC-LV (49).

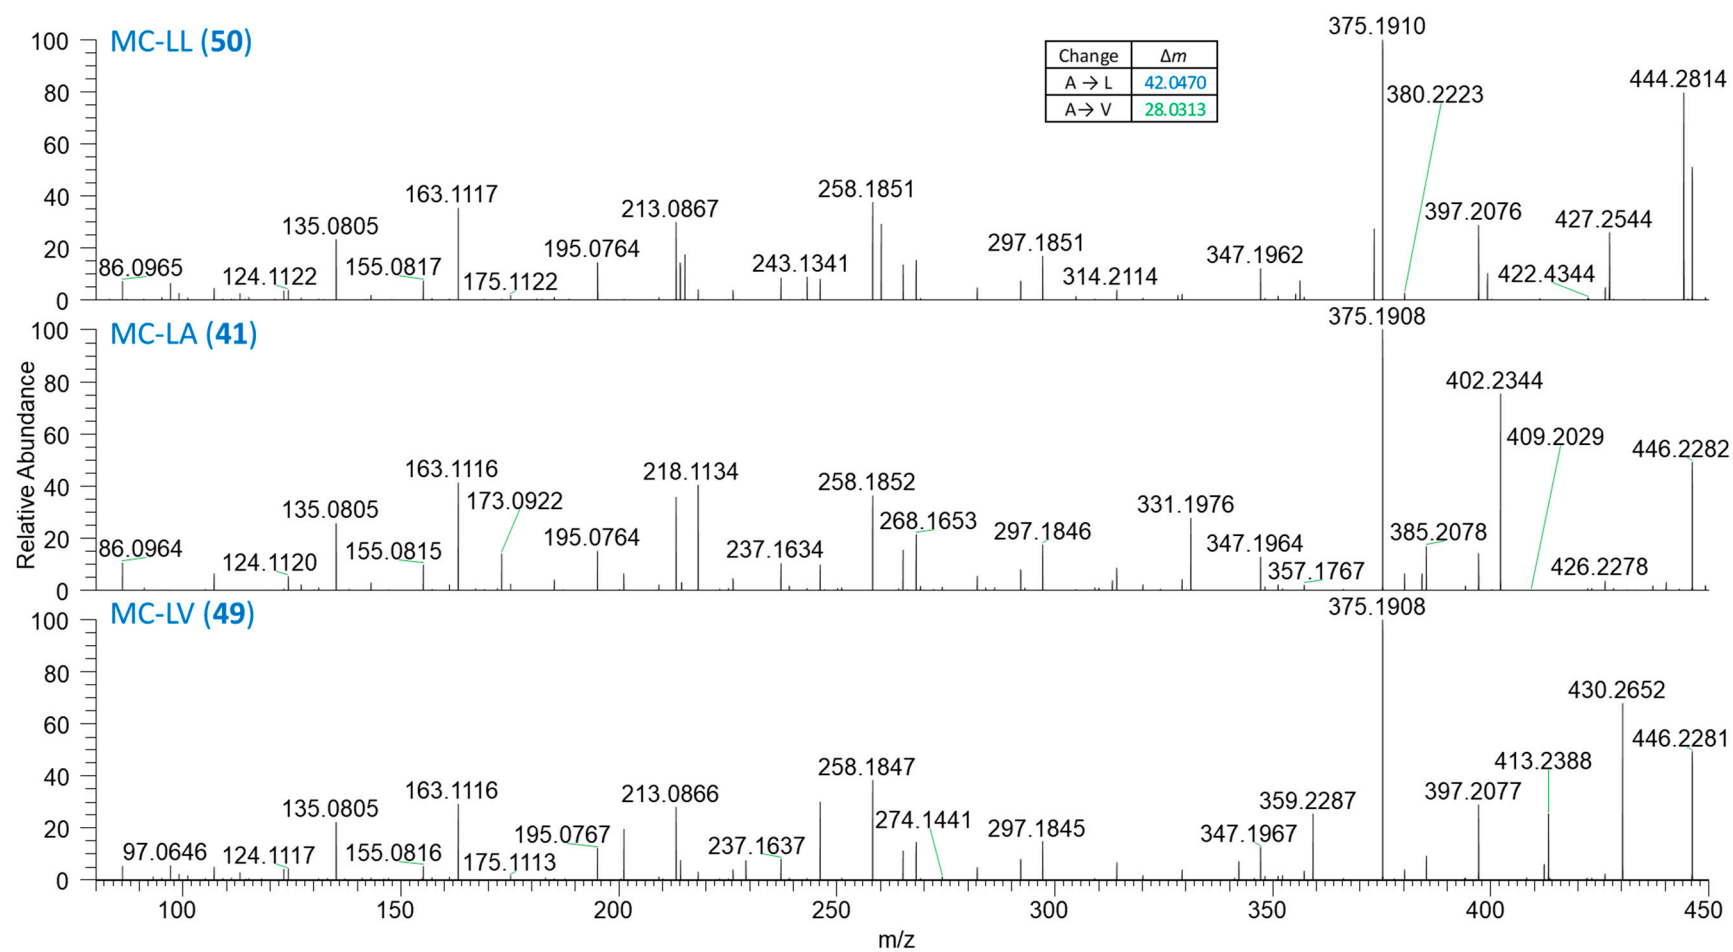

**Figure S47.** Expansion of LC-HRMS/MS spectra of  $[M+H]^+$  of MC-LL (50), MC-LA (41), and MC-LV (49).

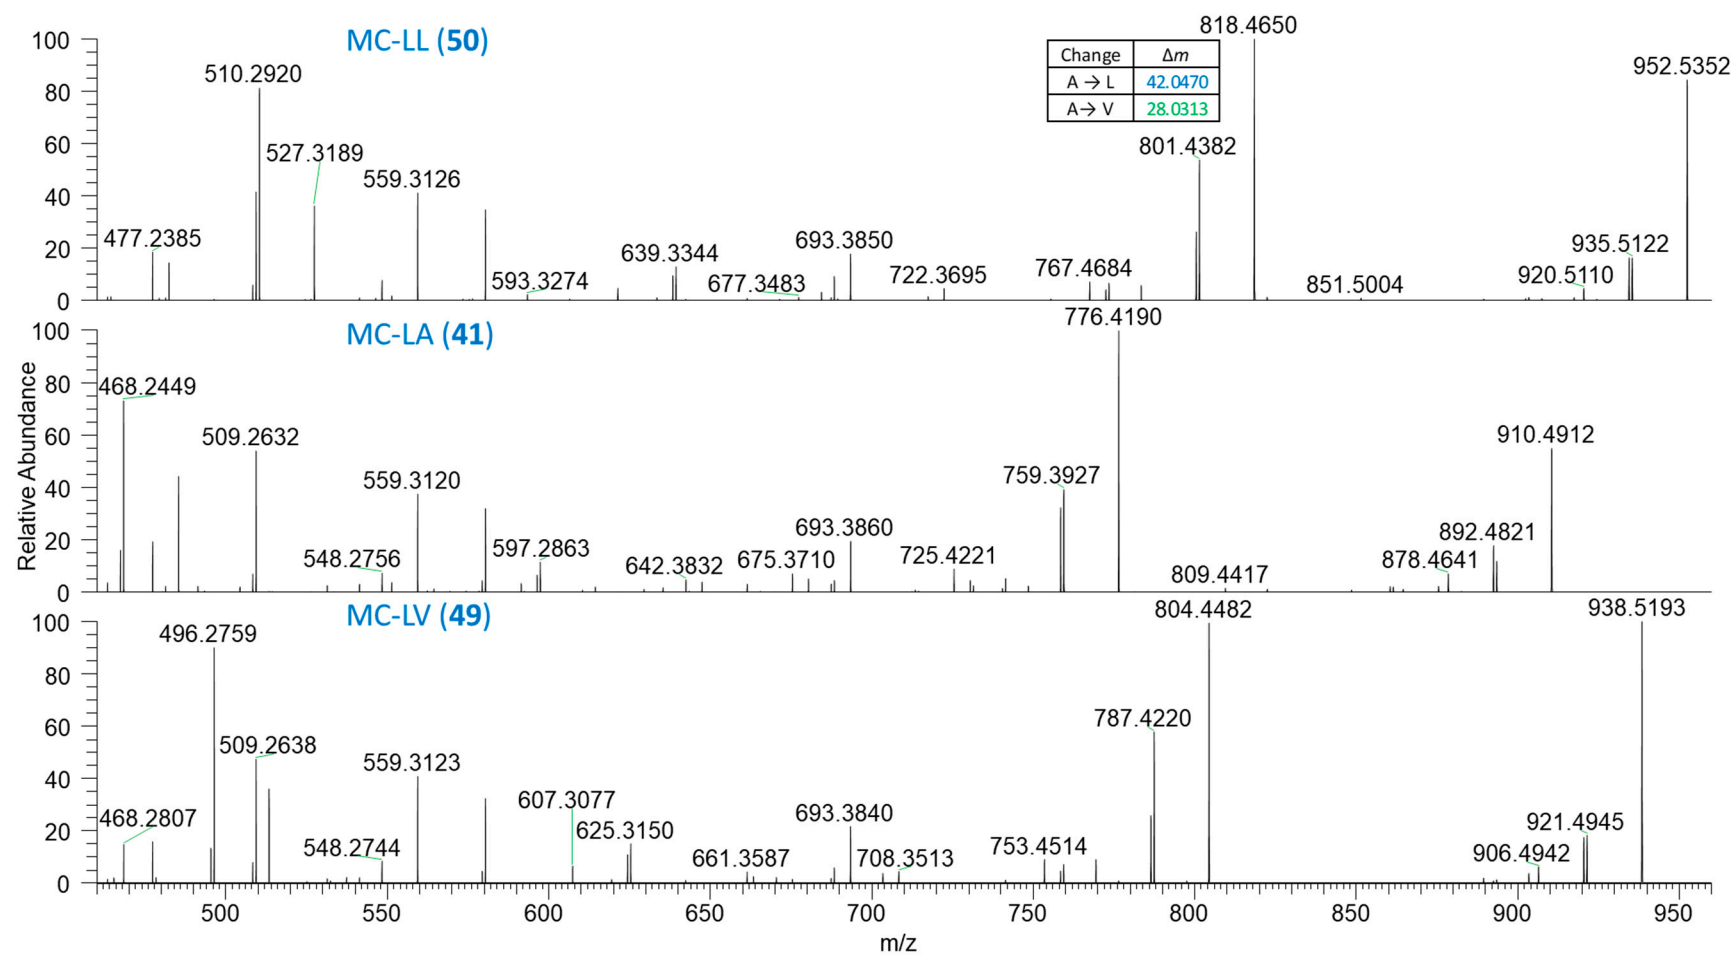

**Figure S48.** Expansion of LC–HRMS/MS spectra of  $[M+H]^+$  of MC-LL (50), MC-LA (41), and MC-LV (49).

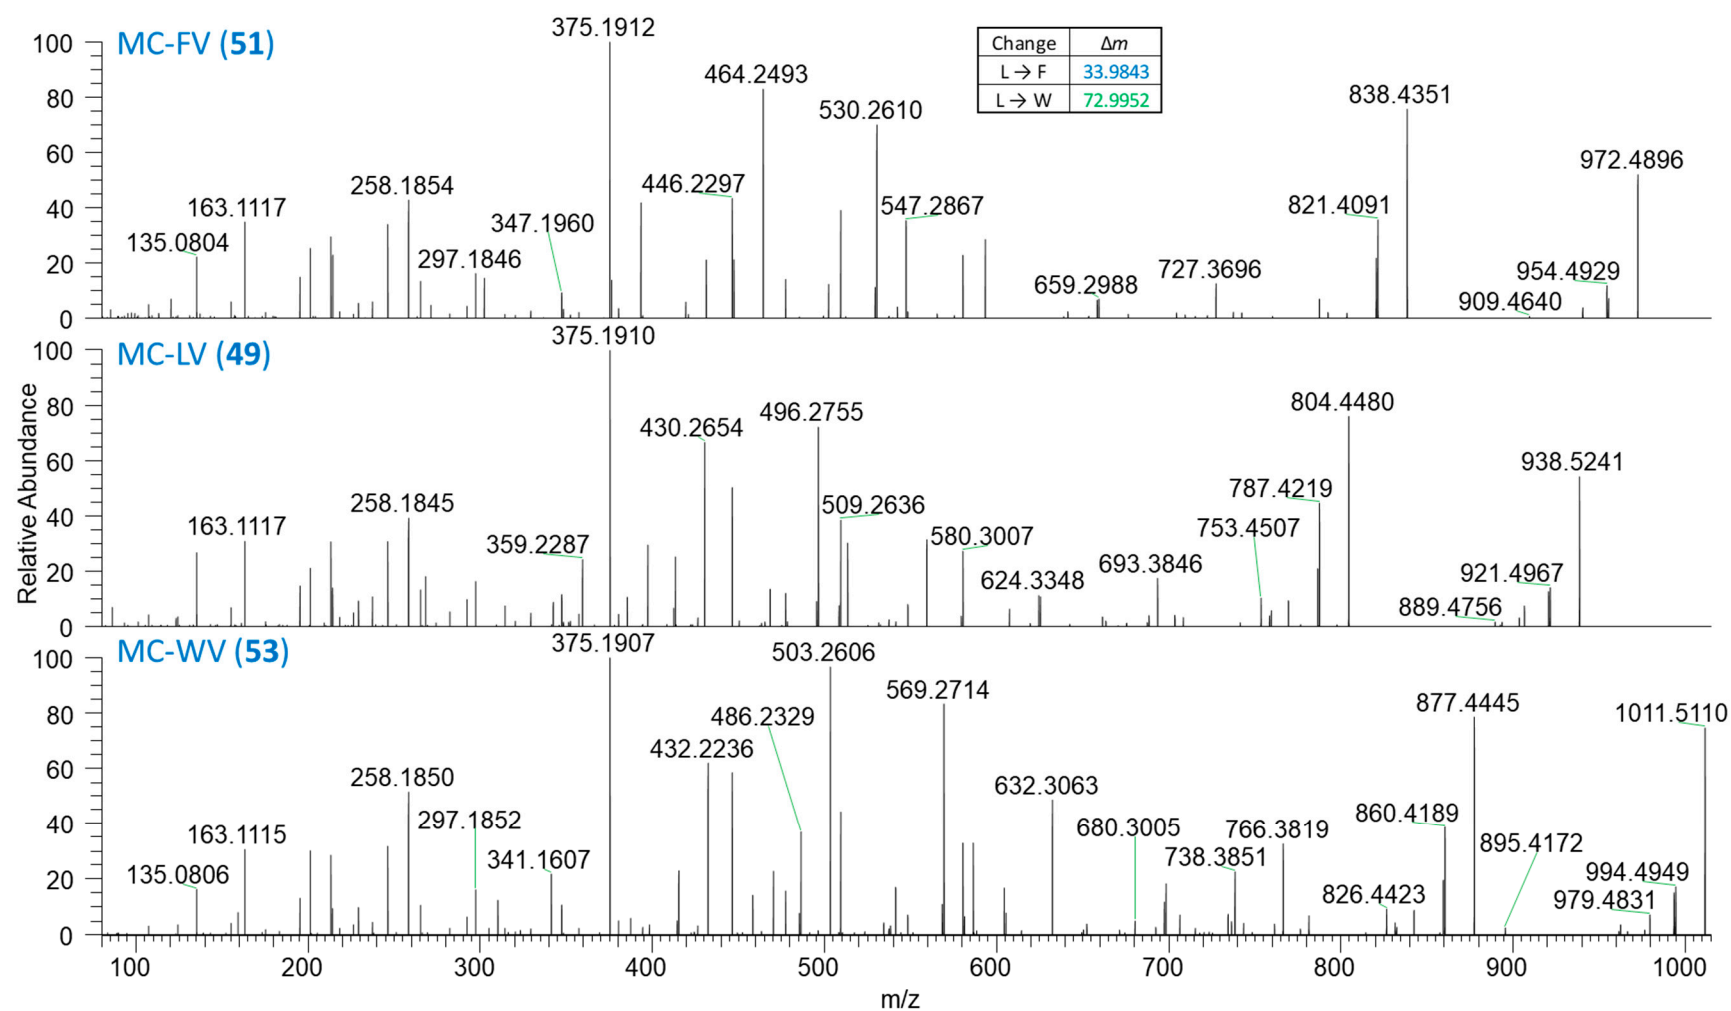

Figure S49. LC-HRMS/MS spectra of  $[M+H]^+$  of MC-FV (51), MC-LV (49), and MC-WV (53).

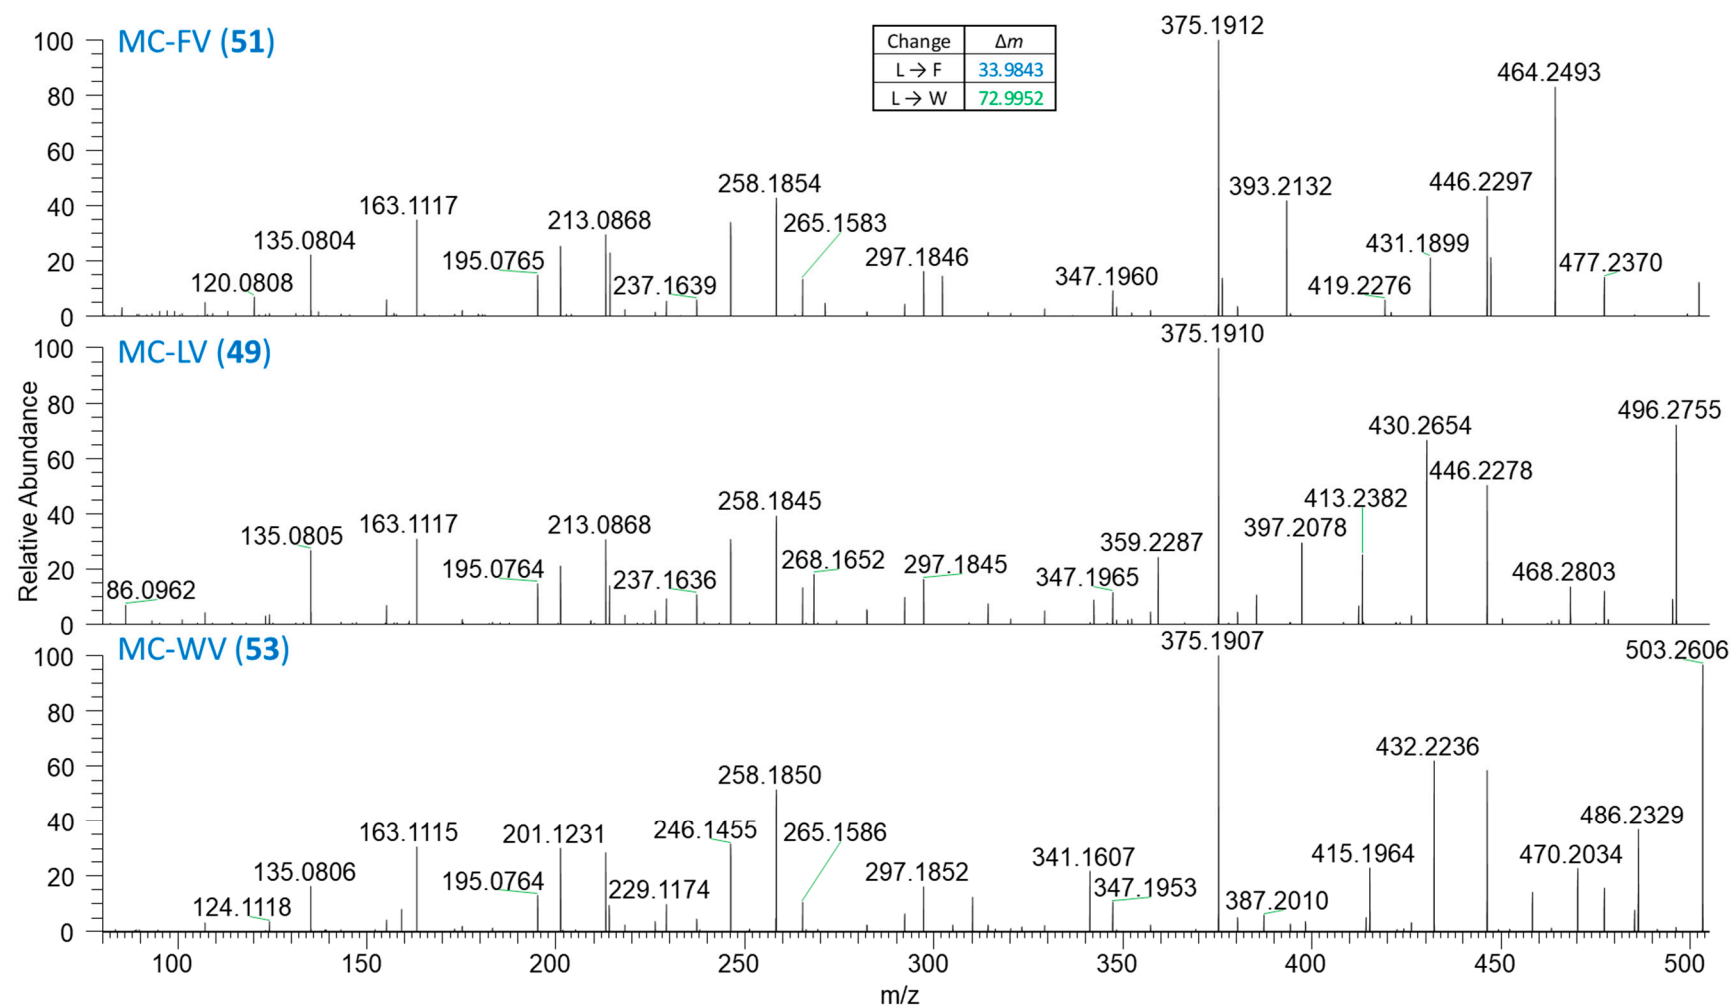

Figure S50. Expansion of LC-HRMS/MS spectra of  $[M+H]^+$  of MC-FV (51), MC-LV (49), and MC-WV (53).

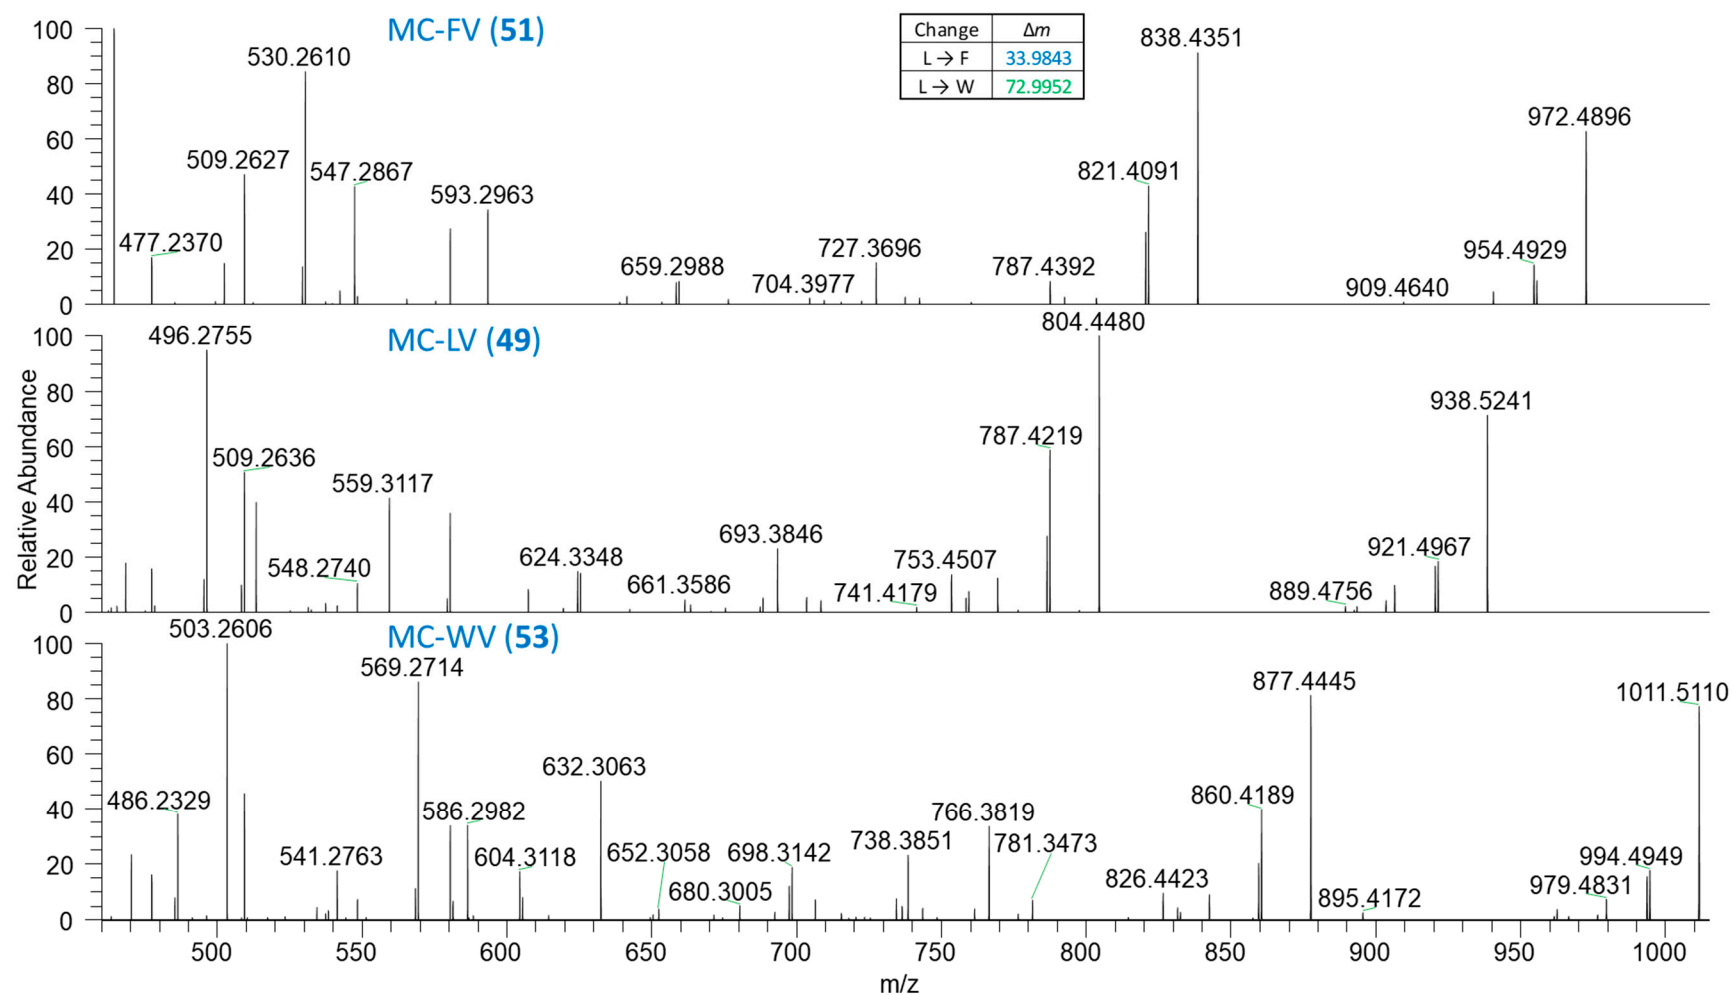

**Figure S51.** Expansion of LC-HRMS/MS spectra of  $[M+H]^+$  of MC-FV (51), MC-LV (49), and MC-WV (53).



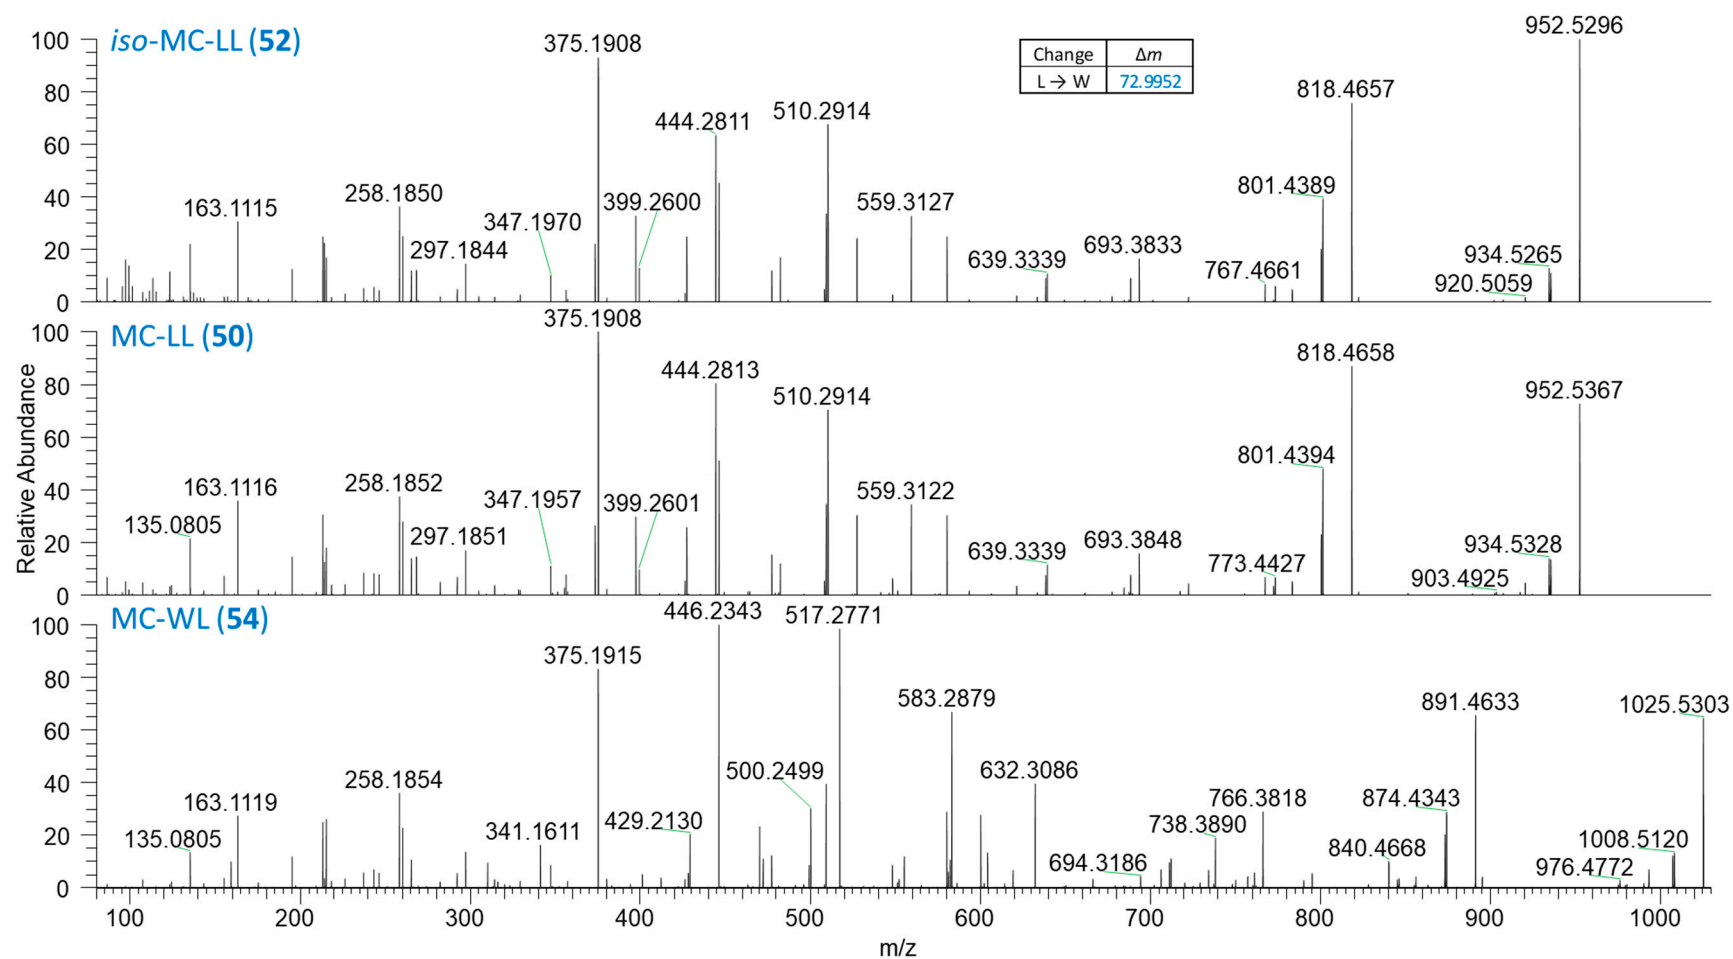

Figure S52. LC-HRMS/MS spectra of  $[M+H]^+$  of *iso*-MC-LL (52), MC-LL (50), and MC-WL (54).

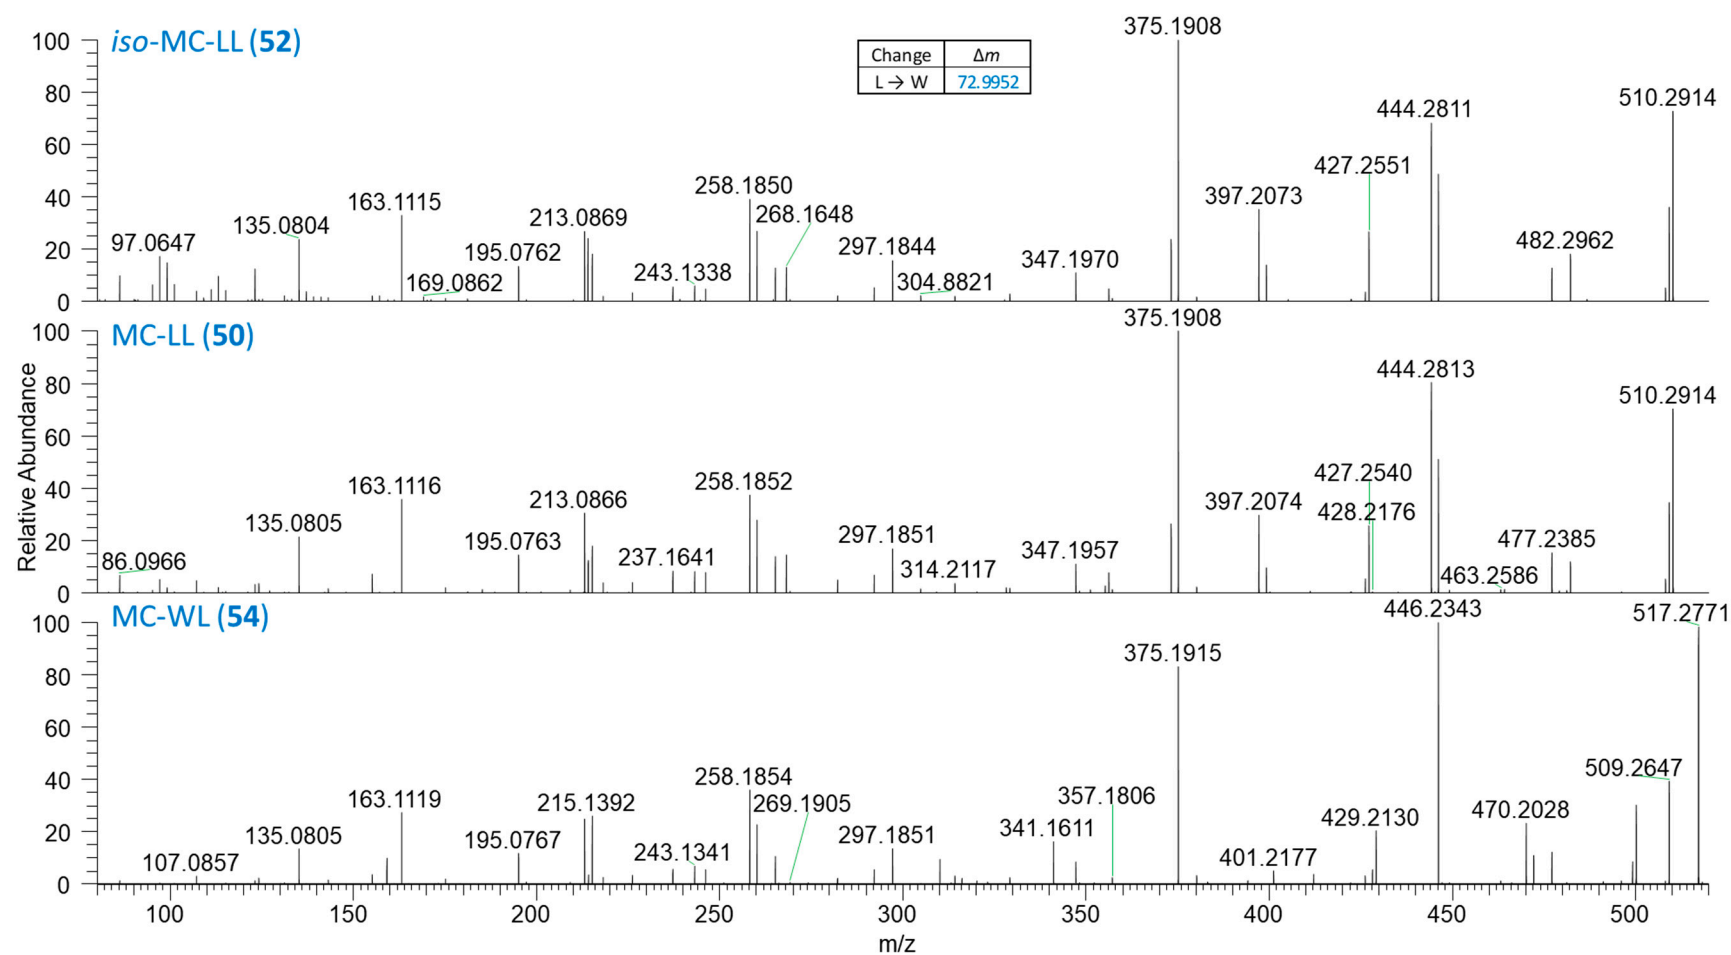

**Figure S53.** Expansion of LC–HRMS/MS spectra of  $[M+H]^+$  of *iso*-MC-LL (52), MC-LL (50), and MC-WL (54).

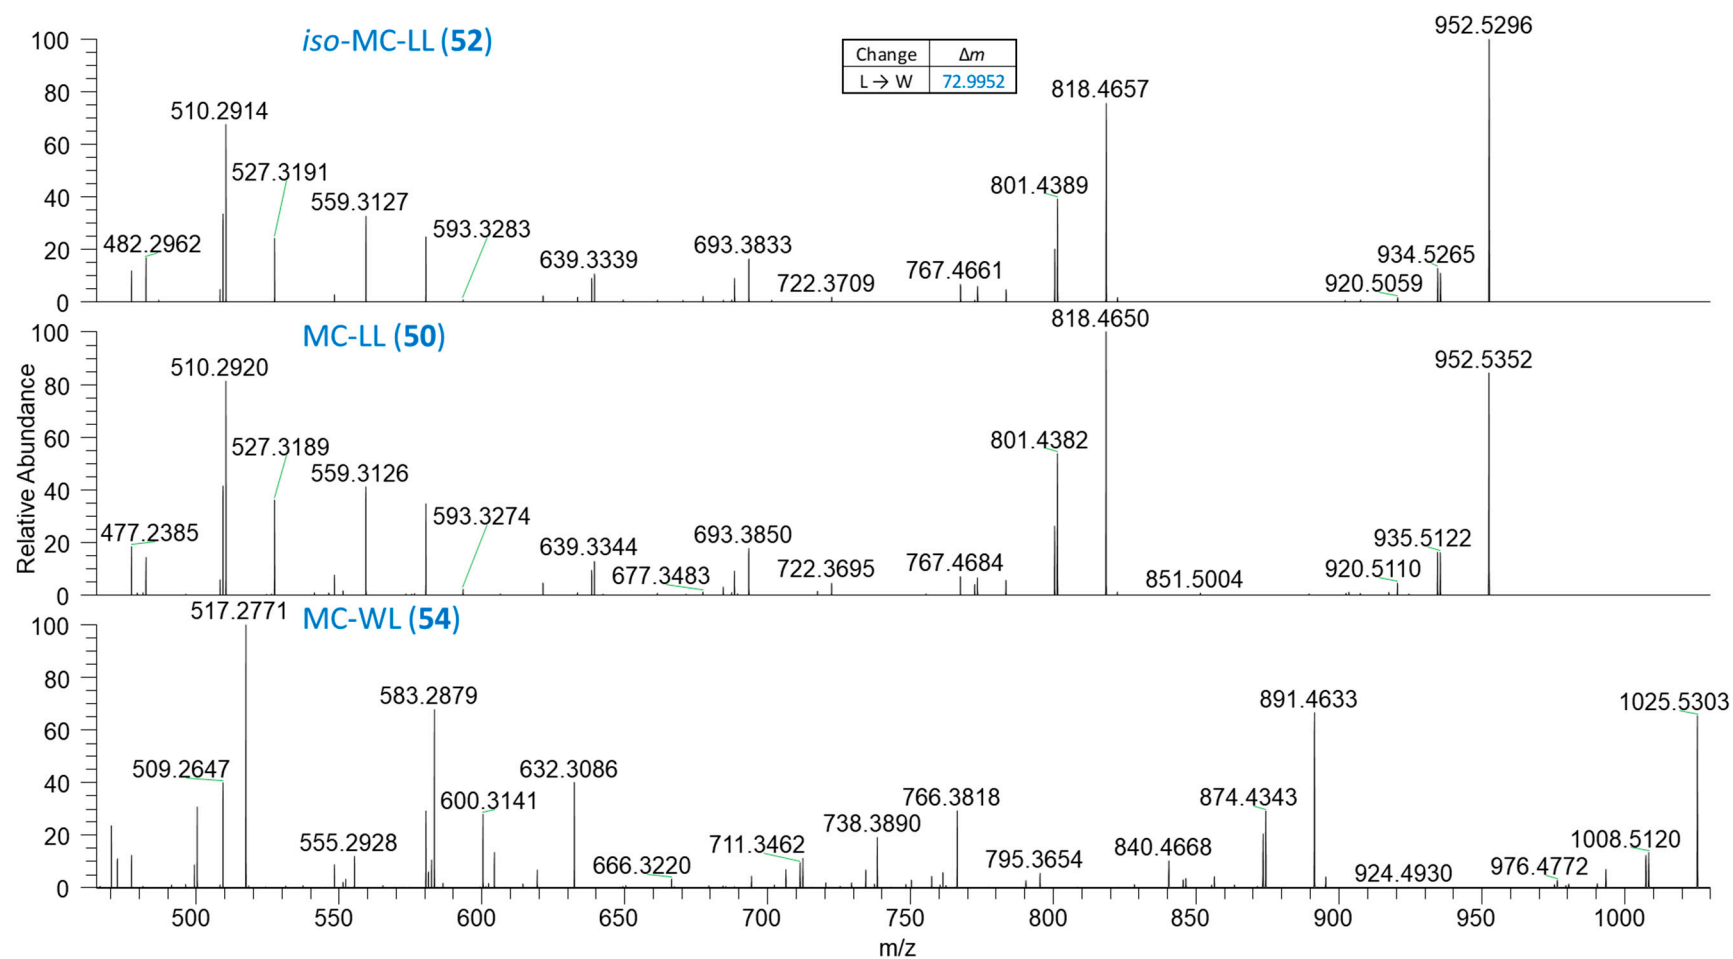

**Figure S54.** Expansion of LC–HRMS/MS spectra of  $[M+H]^+$  of *iso*-MC-LL (52), MC-LL (50), and MC-WL (54).

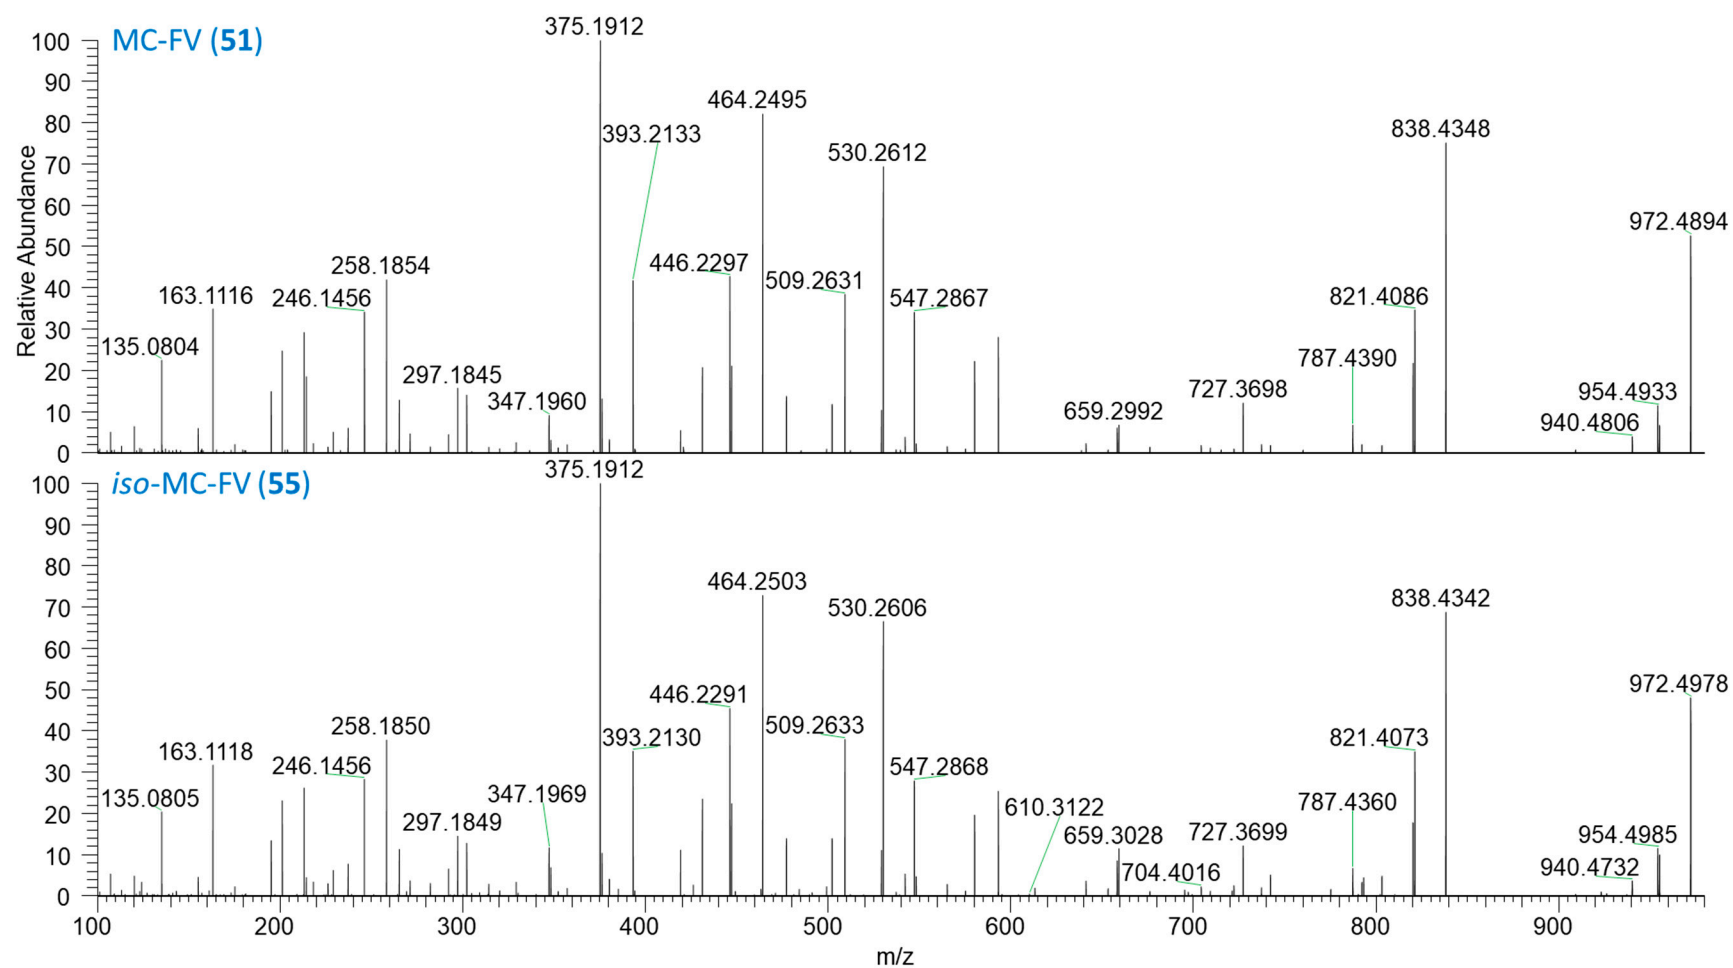

**Figure S55.** LC-HRMS/MS spectra of  $[M+H]^+$  of MC-LL (51), and *iso*-MC-FV (55).

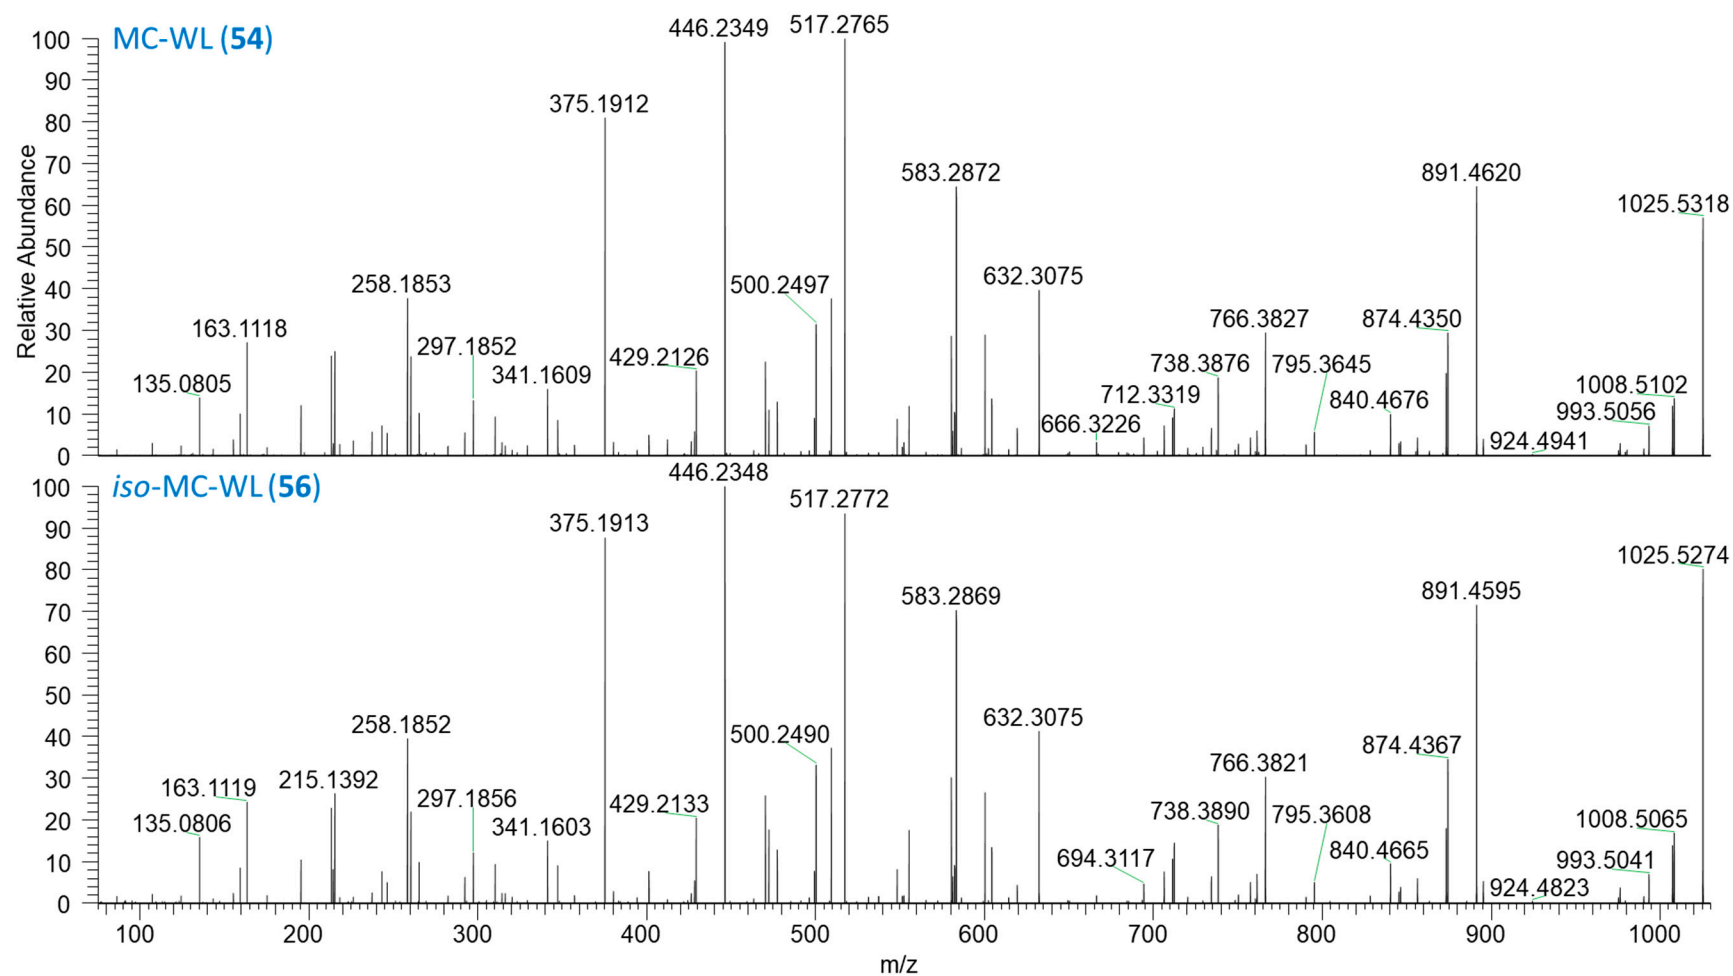

**Figure S56.** LC-HRMS/MS spectra of  $[M+H]^+$  of MC-WL (54), and *iso*-MC-WL (56).

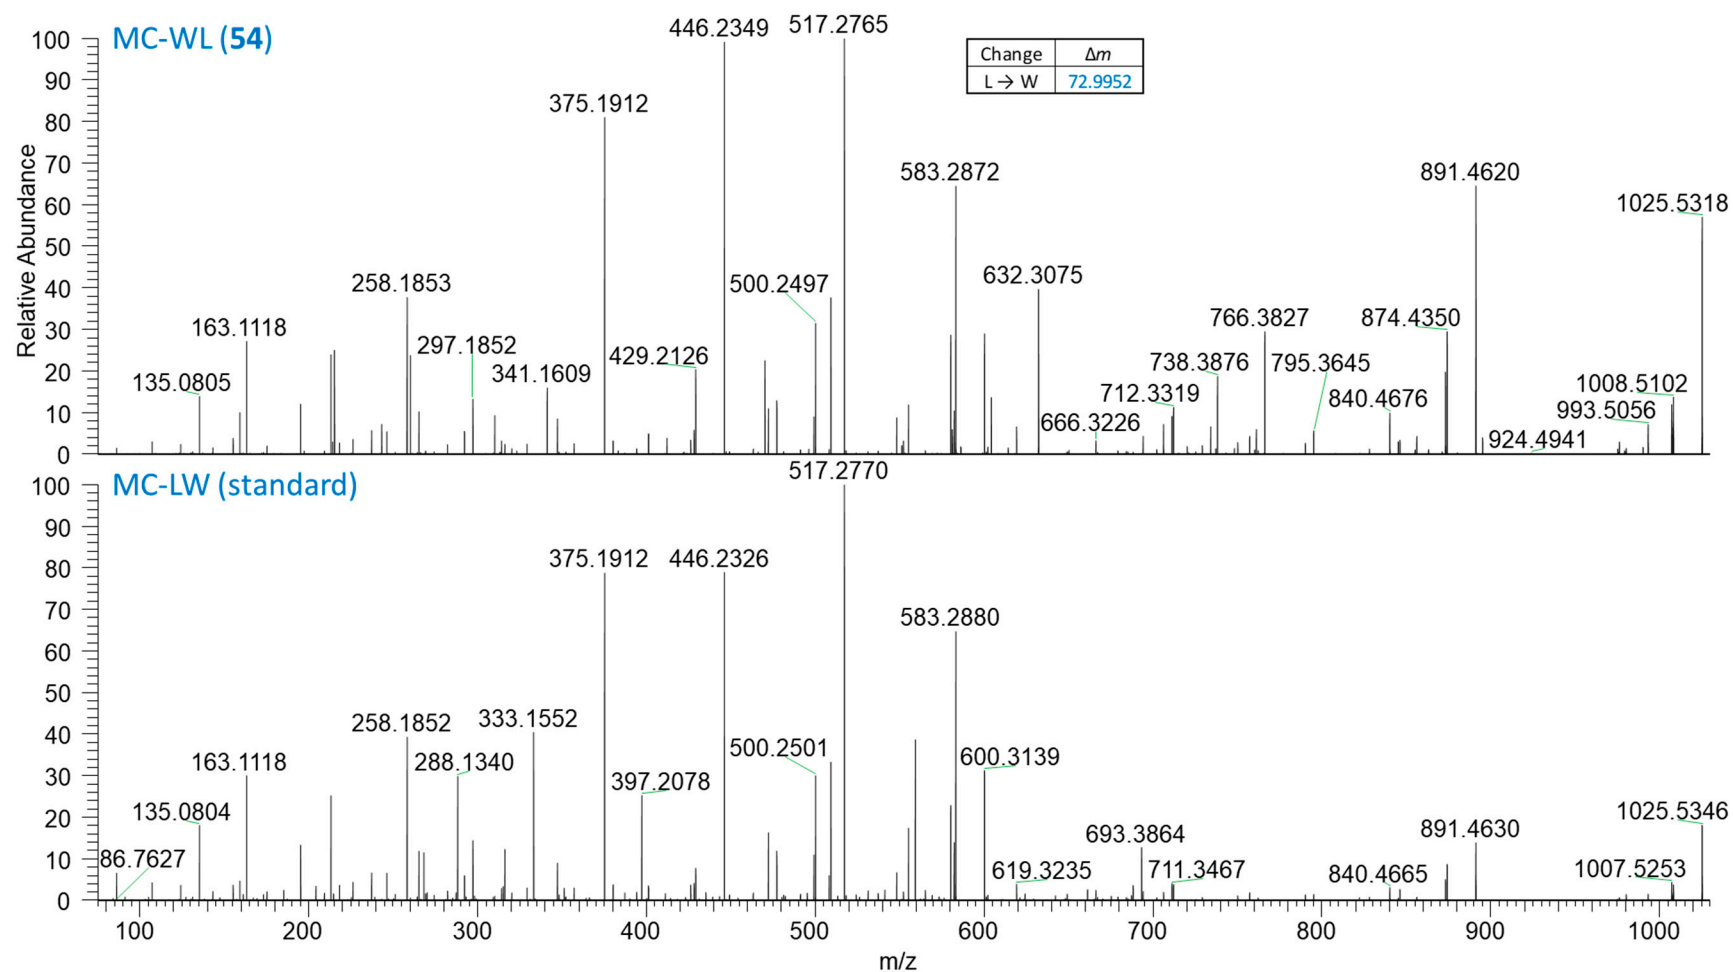

Figure S57. LC–HRMS/MS spectra of  $[M+H]^+$  of MC-WL (54), and a standard of MC-LW.

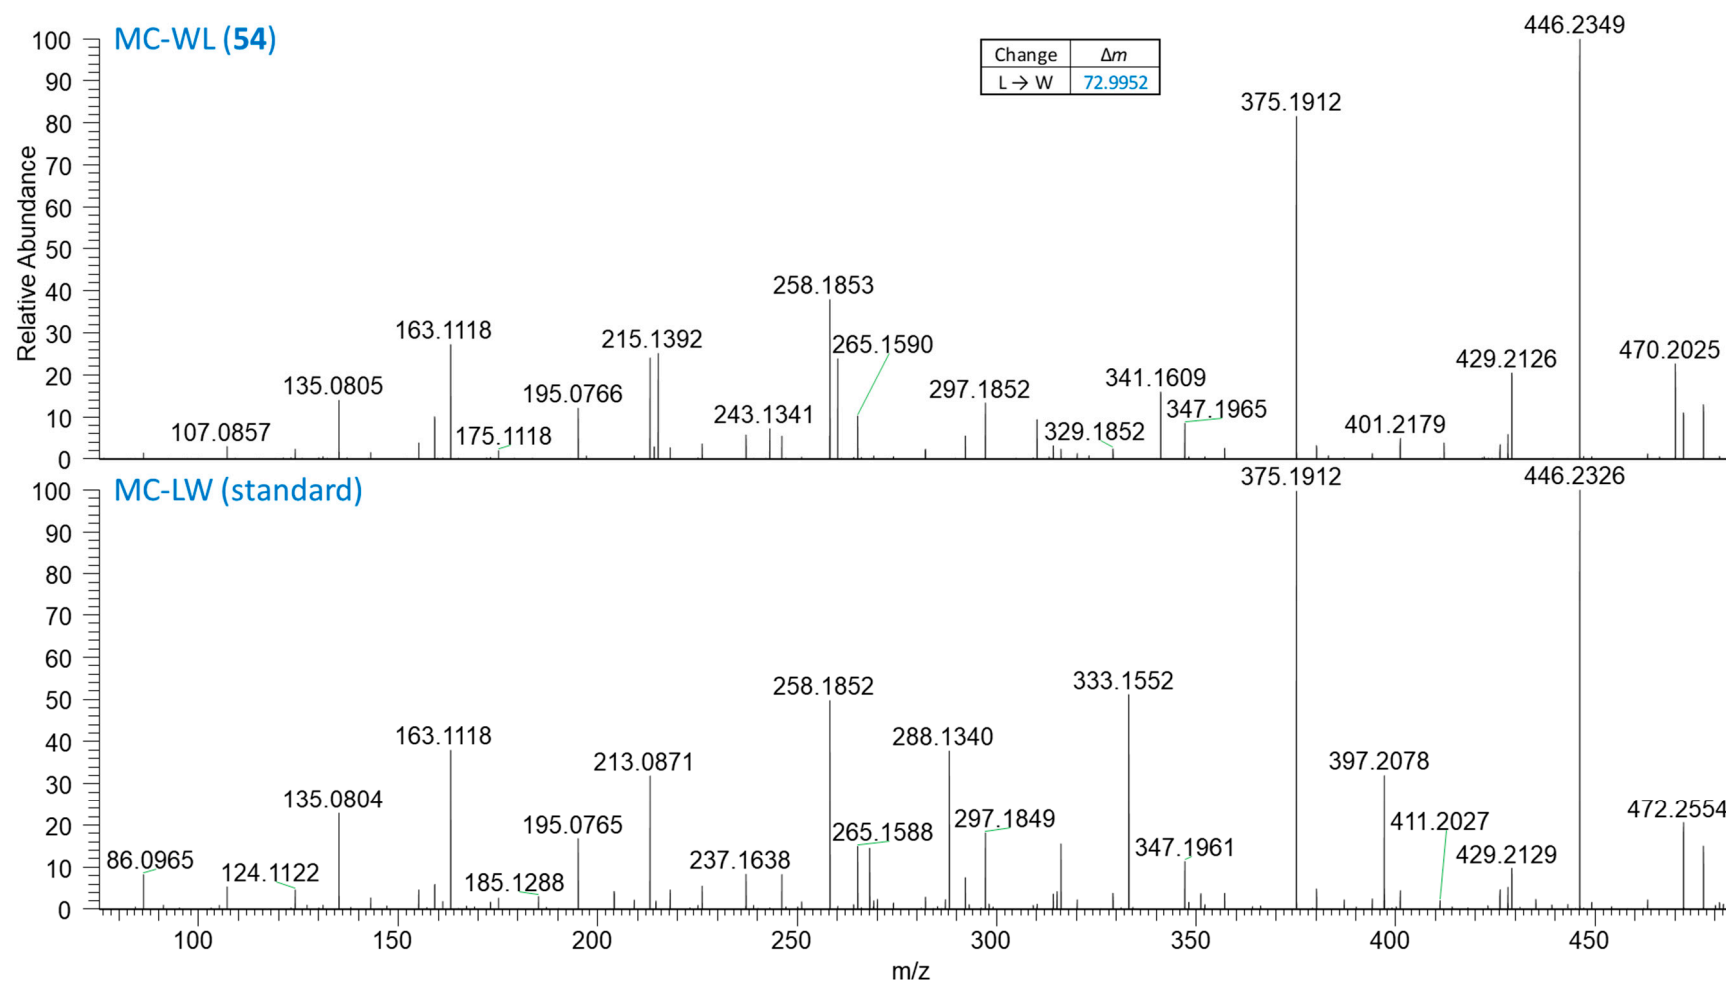

Figure S58. LC-HRMS/MS spectra of  $[M+H]^+$  of MC-WL (54), and a standard of MC-LW.

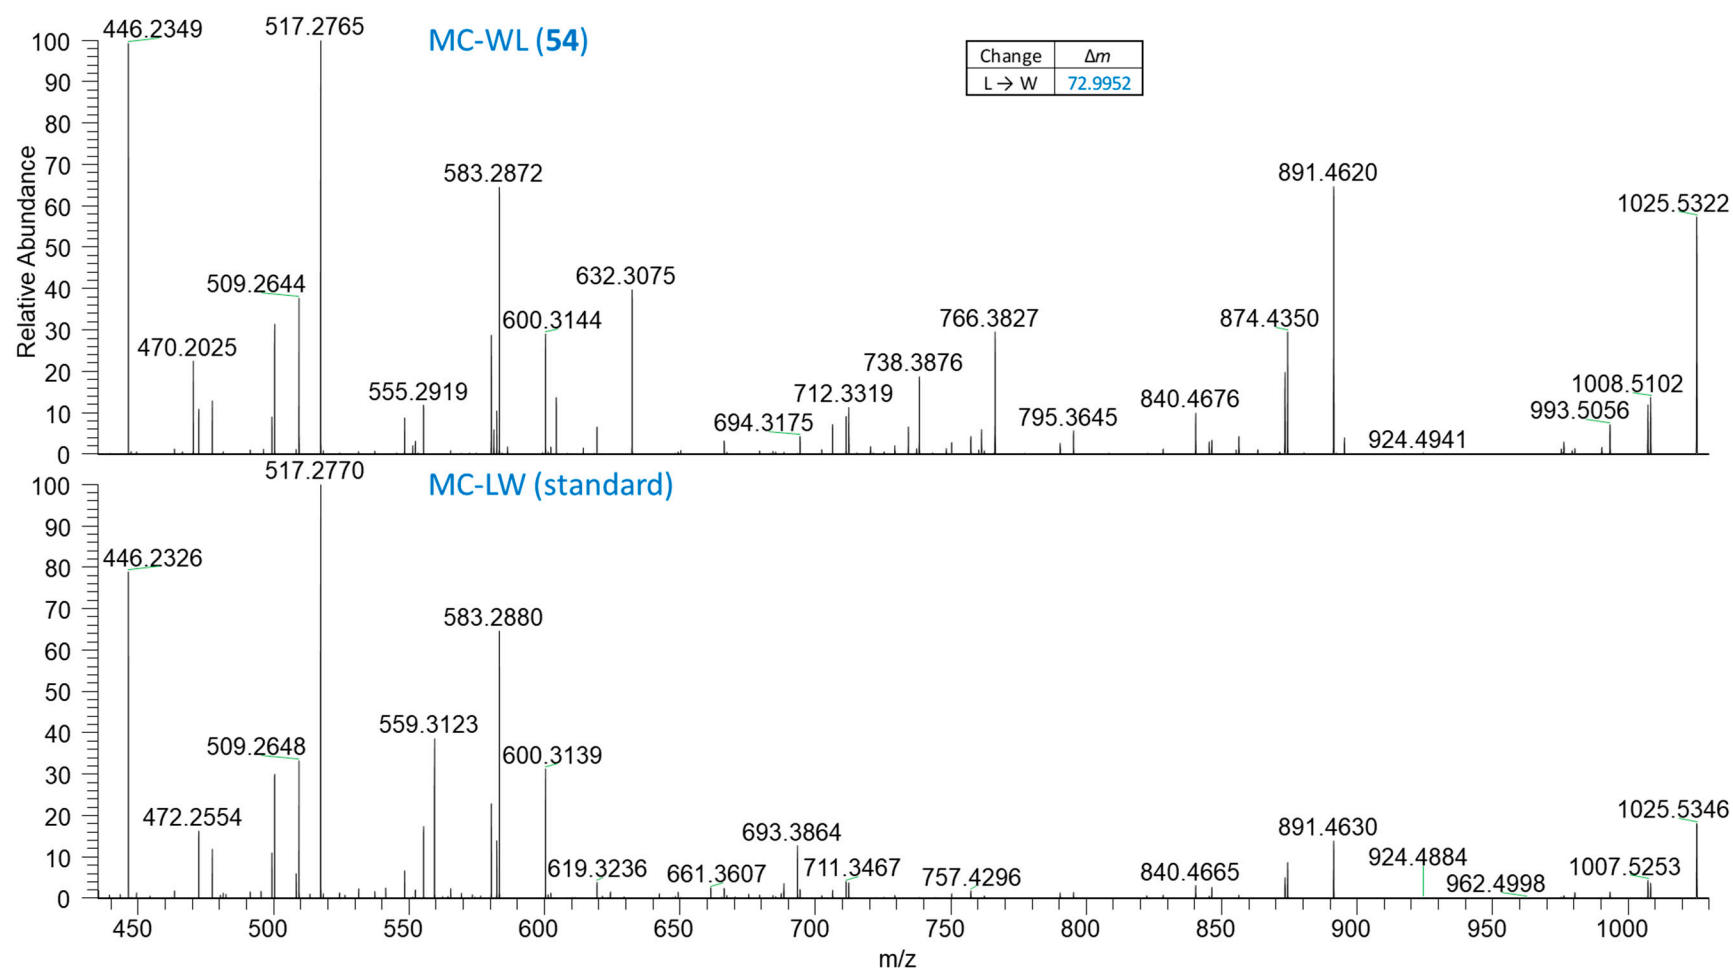

**Figure S59.** LC-HRMS/MS spectra of  $[M+H]^+$  of MC-WL (54), and a standard of MC-LW.



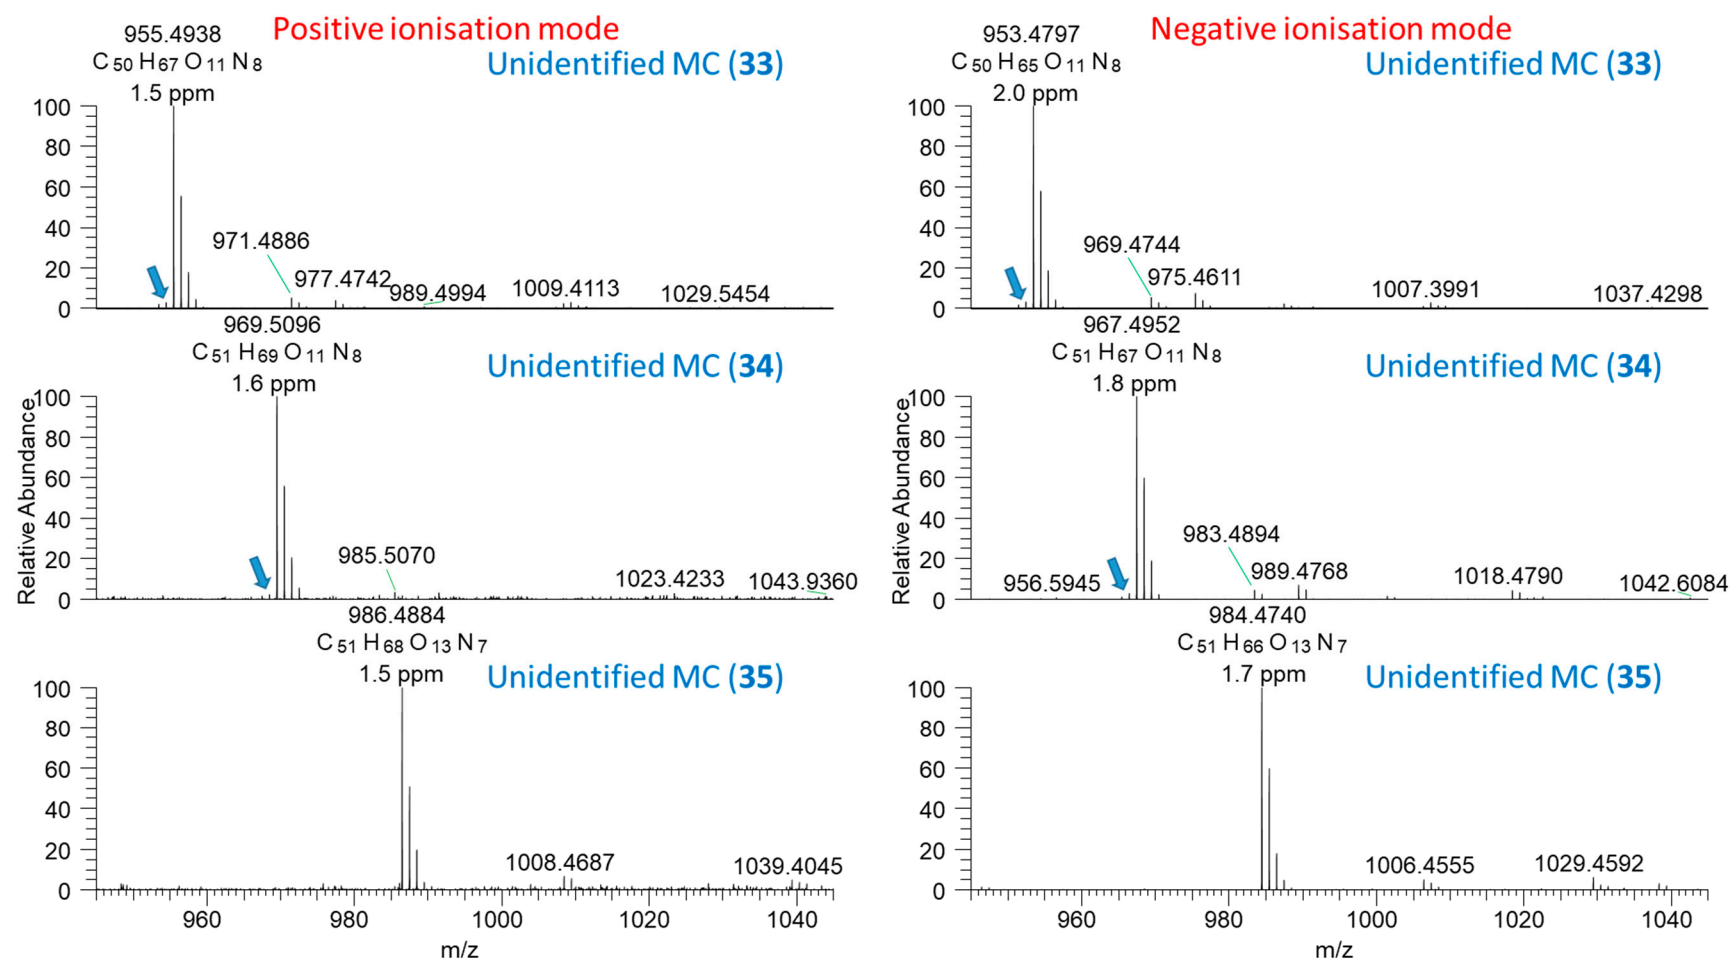

**Figure S60.** LC-HRMS full scan spectra of  $[M+H]^+$  of unidentified microcystins 33–35 in positive (left) and negative (right) ionisation modes. Note the peaks to the low-mass side of the main peaks for 33 and 34, as well as the apparent presence of  $[M+15.9949]$ , in both ionisation modes.
